# Supplementary material for: Temperate Regenerative Agriculture; a win-win for soil carbon and crop yield?
Source: Research Square preprint supplement (doi:10.21203/rs.3.rs-1064515/v1), 2021-11-09
Supplement: Supplementary file 1 [file 14c89ae33ee33b19c8feff68.docx]

| **Table 2**. Estimates of soil organic carbon (g.100g-1) and arable crop yield (t.ha-1) following implementation of no or reduced tillage, cover crops or ley-arable systems. 95% Credible Intervals are given in brackets, with * denoting where these do not overlap with 0. The - symbol denotes predictors not included in that model. Study duration, absolute latitude, baseline SOC, % clay and soil sampling depth were centred before the analysis to assist interpretation of model output. The Intercept corresponds to ‘conventional’ practice (reference category: conventional tillage, no cover cropping or ley phase) for these centred predictor values, with other columns showing the difference from this Intercept for one increment in the unit of the respective predictor. Results are presented for five iterations of the analysis with different levels of data availability and quality (see Methods for further details), with EIBI results discussed in the text. | | | | | | | | | | | | | | | | |
| --- | --- | --- | --- | --- | --- | --- | --- | --- | --- | --- | --- | --- | --- | --- | --- | --- |
| Model | Response | Intercept† | No till | Reduced till | Cover crops‡ | Ley-arable†† | Study duration | Latitude‡‡ | SOC baseline | Soil % clay | Soil sampling depth | SOC-yield residual correlation | R2 | | n | |
| Whole model | Fixed effects | Data points | Studies |
| EP: Error present | SOC | -0.97  (-4.99, 3.60) | 0.11  (0.03, 0.19)* | 0.09  (0.02, 0.17)* | 0.07  (-0.06, 0.20) | 0.03  (0.01, 0.06)* | -0.00  (-0.01, 0.01) | 0.05  (-0.04, 0.13) | - | -0.02  (-0.07, 0.01) | -0.05  (-0.1, -0.00)* | 0.33  (0.05, 0.57) | 0.968 | 0.526 | 66 | 16 |
| Yield | 48.95  (-12.52, 108.57) | -1.78  (-6.39, 2.92) | -0.82  (-5.77, 3.91) | -1.66  (-8.74, 5.74) | 0.23  (-0.72, 1.22) | -0.03  (-0.67, 0.06) | 0.16  (-0.96, 1.33) | - | - | - | 0.947 | 0.946 |
| EI: Error imputed | SOC | 1.68  (1.34, 1.99) | 0.06  (0.00, 0.11)* | 0.09  (0.04, 0.15)* | 0.05  (-0.01, 0.12) | 0.05  (0.03, 0.08)* | 0.00  (-0.00, 0.00) | 0.04  (-0.04, 0.12) | - | -0.04  (-0.08, 0.00) | -0.06  (-0.09, -0.02)* | 0.16  (-0.01, 0.32) | 0.982 | 0.438 | 195 | 40 |
| Yield | 8.64  (3.77, 13.58) | -0.89  (-2.44, 0.66) | -0.49  (-2.00, 1.03) | -0.23  (-2.21, 1.74) | 0.18  (-0.39, 0.76) | -0.08  (-0.19, 0.02) | -0.01  (-0.83, 0.81) | - | - | - | 0.942 | 0.501 |
| EIBP: Baseline present, error imputed | SOC | 1.43  (0.97, 1.75) | 0.07  (0.00, 0.15)* | 0.02  (-0.05, 0.09) | 0.06  (-0.02, 0.15) | 0.05  (0.02, 0.08)* | 0.00  (-0.00 0.00) | 0.03  (-0.03, 0.08) | 0.76  (0.38, 1.10)* | 0.01  (-0.05, 0.04) | -0.01  (-0.07, 0.04) | 0.21  (-0.05, 0.44) | 0.980 | 0.776 | 79 | 14 |
| Yield | 5.43  (-0.67, 10.71) | -1.26  (-2.86, 0.29) | -0.29  (-1.94, 1.35) | -0.08  (-2.21, 2.12) | -0.07  (-0.81, 0.61) | -0.03  (-0.10, 0.05) | 0.13  (-0.50, 0.78) | - | - | - | 0.853 | 0.670 |
| EIBI: Baseline and error imputed | SOC | 1.66  (1.34, 1.96) | 0.06  (0.00, 0.12)* | 0.09  (0.03, 0.15)* | 0.07  (-0.00, 0.14) | 0.05  (0.03, 0.08)* | 0.00  (-0.00, 0.00) | 0.05  (-0.04, 0.12) | 0.10  (-0.04, 0.30) | -0.03  (-0.07, 0.01) | -0.05  (-0.09, -0.02)* | 0.15  (-0.03, 0.31) | 0.983 | 0.460 | 195 | 40 |
| Yield | 8.67  (3.78, 13.58) | -0.89  (-2.44, 0.65) | -0.49  (-1.99, 1.01) | -0.23  (-2.19, 1.72) | 0.18  (-0.40, 0.75) | -0.08  (-0.18, 0.03) | -0.00  (-0.81, 0.80) | - | - | - | 0.943 | 0.500 |
| CA: EIBI data with critical appraisal scores 3&4 | SOC | 1.63  (1.31, 1.94) | 0.05  (-0.01, 0.10) | 0.05  (-0.00, 0.11) | 0.05  (-0.01, 0.12) | 0.06  (0.04, 0.08)* | 0.00  (-0.00, 0.00) | 0.01  (-0.08, 0.10) | 0.02  (-0.32, 0.33) | -0.02  (-0.06, 0.01) | -0.08  (-0.12, -0.05)* | 0.08  (-0.11, 0.27) | 0.979 | 0.596 | 144 | 25 |
| Yield | 4.07  (0.70, 7.17) | -0.77  (-1.83, 0.27) | -0.31  (-1.31, 0.70) | 0.12  (-1.17, 1.41) | 0.23  (-0.12, 0.57) | -0.03  (-0.09, 0.02) | 0.05  (-0.44, 0.52) | - | - | - | 0.975 | 0.888 |
| †Conventional tillage and no cover crops or ley-phase in rotation.  ‡Estimated effect where cover crops are present in every year of the rotation  ††Estimated effect of one year of ley in a rotation, would increase as multiple of total ley duration within rotation.  ‡‡Absolute latitude. | | | | | | | | | | | | | | | | |
