# Supplementary material for: Temperate Regenerative Agriculture; a win-win for soil carbon and crop yield?
Source: Research Square preprint supplement (doi:10.21203/rs.3.rs-1064515/v1), 2021-11-09
Supplement: Supplementary file 3 [file e794e3d785b8f4e770b63962.xlsx]

## Sheet: NTCCLA_datasheet_SOC_Yield_Cfb_
Unique_article_ID	Author	Year	Title	Abstract	Journal	Volume	Issue	Pages	Other_articles_same_study_uniqueID	Other_articles_same_study_citation	Unique_study_ID	Extra_calc_performed	TILL_data	CC_data	LA_data	SOC_error	Yield_error	SOC_study_design	Yield_study_design	Study Country	Location	Latitude	Longitude	Experimental Design	Plot_dimensions_m	Plot_area_m2	Spatial Replicates	Notes	Temporal Replicates	Notes	Sampling Precision	Notes	Soil_type	Clay (%)	Silt (%)	Sand (%)	Bulk_density_g.cm-3	pH	pH_type	Soil_properties_notes	CA _spatial	CA_temporal	CA_treatment	CA_duration	CA_depth	CA_spatial_treatment_sum	CA_overall	Intervention_started	Intervention_ended_Last_sampled
2021RGHL_CCLANT025	I. Mijangos; I. Albizu; L. Epelde; A. Ibarra; C. Garbisu	2008	Effect of tillage and slurry application on soil quality and CO<sub>2</sub> emissions		Multifunctional grasslands in a changing world	1	29		2021RGHL_CCLANT026	I. Mijangos; I. Albizu; L. Epelde; M. Pinto; O. d. Hierro; H. Arriaga; C. Garbisu (2008) Effects of direct seeding and cow slurry application on maize production in fine-textured soils. (Grassland Science in Europe, Volume 13), Proceedings of the 22nd General Meeting of the European Grassland Federation, Uppsala, Sweden, 9-12 June 2008; 2008 613-615 5 ref	2021RGHL_CCLANT025	Yield data extracted from figure	Yes			Yes	Yes	BACI	ELCI	Spain	Basque Country	43.064	-2.65	Randomised complete block	5x3.5	17.5	3		2		15		Silty clay loam	33				5.1	H2O		1	0	2	-2	0	3	High	2005	2008
2021RGHL_CCLANT025	I. Mijangos; I. Albizu; L. Epelde; A. Ibarra; C. Garbisu	2008	Effect of tillage and slurry application on soil quality and CO<sub>2</sub> emissions		Multifunctional grasslands in a changing world	1	29		2021RGHL_CCLANT026	I. Mijangos; I. Albizu; L. Epelde; M. Pinto; O. d. Hierro; H. Arriaga; C. Garbisu (2008) Effects of direct seeding and cow slurry application on maize production in fine-textured soils. (Grassland Science in Europe, Volume 13), Proceedings of the 22nd General Meeting of the European Grassland Federation, Uppsala, Sweden, 9-12 June 2008; 2008 613-615 5 ref	2021RGHL_CCLANT025	Yield data extracted from figure	Yes			Yes	Yes	BACI	ELCI	Spain	Basque Country	43.064	-2.65	Randomised complete block	5x3.5	17.5	3		2		15		Silty clay loam	33				5.1	H2O		1	0	2	-2	0	3	High	2005	2008
2021RGHL_CCLANT025	I. Mijangos; I. Albizu; L. Epelde; A. Ibarra; C. Garbisu	2008	Effect of tillage and slurry application on soil quality and CO<sub>2</sub> emissions		Multifunctional grasslands in a changing world	1	29		2021RGHL_CCLANT026	I. Mijangos; I. Albizu; L. Epelde; M. Pinto; O. d. Hierro; H. Arriaga; C. Garbisu (2008) Effects of direct seeding and cow slurry application on maize production in fine-textured soils. (Grassland Science in Europe, Volume 13), Proceedings of the 22nd General Meeting of the European Grassland Federation, Uppsala, Sweden, 9-12 June 2008; 2008 613-615 5 ref	2021RGHL_CCLANT025	Yield data extracted from figure	Yes			Yes	Yes	BACI	ELCI	Spain	Basque Country	43.064	-2.65	Randomised complete block	5x3.5	17.5	3		2		15		Silty clay loam	33				5.1	H2O		1	0	2	-2	0	3	High	2005	2008
2021RGHL_CCLANT025	I. Mijangos; I. Albizu; L. Epelde; A. Ibarra; C. Garbisu	2008	Effect of tillage and slurry application on soil quality and CO<sub>2</sub> emissions		Multifunctional grasslands in a changing world	1	29		2021RGHL_CCLANT026	I. Mijangos; I. Albizu; L. Epelde; M. Pinto; O. d. Hierro; H. Arriaga; C. Garbisu (2008) Effects of direct seeding and cow slurry application on maize production in fine-textured soils. (Grassland Science in Europe, Volume 13), Proceedings of the 22nd General Meeting of the European Grassland Federation, Uppsala, Sweden, 9-12 June 2008; 2008 613-615 5 ref	2021RGHL_CCLANT025	Yield data extracted from figure	Yes			Yes	Yes	BACI	ELCI	Spain	Basque Country	43.064	-2.65	Randomised complete block	5x3.5	17.5	3		2		15		Silty clay loam	33				5.1	H2O		1	0	2	-2	0	3	High	2005	2008
2021RGHL_CCLANT029	W. J. Ridgman; R. B. Wedgwood	1987	Some residual effects of crop rotation on light land	Effects of previous rotations maintained for 21 years on wheat and potatoes grown after 5 years of uniform cropping are described and discussed. Effects of length of ley in the rotation were detected in soil organic carbon, yield of wheat and yield of potatoes 6, 6 and 7 years, resp., after the last ley was ploughed up. The effect of grazing the leys compared with mowing was detected in soil orga…	Journal of Agricultural Science	108	1	189-193			2021RGHL_CCLANT029	Yield weighted average across 3 N treatments			Yes	Yes	Yes	ELCI	CI	England	Cambridge University Farm	52.228	0.08	Split-plot	36.6x5.5	201.3	1		1		15	Plot size for main plot (rotation)									-1	0	2	1	1	1	Low	1953-58	1979-84
2021RGHL_CCLANT029	W. J. Ridgman; R. B. Wedgwood	1987	Some residual effects of crop rotation on light land	Effects of previous rotations maintained for 21 years on wheat and potatoes grown after 5 years of uniform cropping are described and discussed. Effects of length of ley in the rotation were detected in soil organic carbon, yield of wheat and yield of potatoes 6, 6 and 7 years, resp., after the last ley was ploughed up. The effect of grazing the leys compared with mowing was detected in soil orga…	Journal of Agricultural Science	108	1	189-193			2021RGHL_CCLANT029	Yield weighted average across 3 N treatments			Yes	Yes	Yes	ELCI	CI	England	Cambridge University Farm	52.228	0.08	Split-plot	36.6x5.5	201.3	1		1		15	Plot size for main plot (rotation)									-1	0	2	1	1	1	Low	1953-58	1979-84
2021RGHL_CCLANT029	W. J. Ridgman; R. B. Wedgwood	1987	Some residual effects of crop rotation on light land	Effects of previous rotations maintained for 21 years on wheat and potatoes grown after 5 years of uniform cropping are described and discussed. Effects of length of ley in the rotation were detected in soil organic carbon, yield of wheat and yield of potatoes 6, 6 and 7 years, resp., after the last ley was ploughed up. The effect of grazing the leys compared with mowing was detected in soil orga…	Journal of Agricultural Science	108	1	189-193			2021RGHL_CCLANT029	Yield weighted average across 3 N treatments			Yes	Yes	Yes	ELCI	CI	England	Cambridge University Farm	52.228	0.08	Split-plot	36.6x5.5	201.3	1		1		15	Plot size for main plot (rotation)									-1	0	2	1	1	1	Low	1953-58	1979-84
2021RGHL_CCLANT029	W. J. Ridgman; R. B. Wedgwood	1987	Some residual effects of crop rotation on light land	Effects of previous rotations maintained for 21 years on wheat and potatoes grown after 5 years of uniform cropping are described and discussed. Effects of length of ley in the rotation were detected in soil organic carbon, yield of wheat and yield of potatoes 6, 6 and 7 years, resp., after the last ley was ploughed up. The effect of grazing the leys compared with mowing was detected in soil orga…	Journal of Agricultural Science	108	1	189-193			2021RGHL_CCLANT029	Yield weighted average across 3 N treatments			Yes	Yes	Yes	ELCI	CI	England	Cambridge University Farm	52.228	0.08	Split-plot	36.6x5.5	201.3	1		1		15	Plot size for main plot (rotation)									-1	0	2	1	1	1	Low	1953-58	1979-84
2021RGHL_CCLANT029	F. Hanley; W.J. Ridgman	1979	Results from three cycles of six-course rotations on light land	A rotation experiment comparing the effects of length, type and management of leys on three test crops in six-course rotations during three cycles is described and the results discussed. Although the yields of the test crops varied from cycle to cycle there were no clear-out trends to suggest that the yield improves or deteriorates as time goes on with these particular rotations; the full benefit…	Journal of Agricultural Science	92		717-728			2021RGHL_CCLANT029	Yield averaged across 3 N treatments			Yes	Yes	No	ELCI	CI	England	Cambridge University Farm	52.228	0.08	Split-plot	36.6x5.5	201.3	6		3		15	Plot size for main plot (rotation)									2	0	2	0	1	4	High	1953-58	1970-75
2021RGHL_CCLANT029	F. Hanley; W.J. Ridgman	1979	Results from three cycles of six-course rotations on light land	A rotation experiment comparing the effects of length, type and management of leys on three test crops in six-course rotations during three cycles is described and the results discussed. Although the yields of the test crops varied from cycle to cycle there were no clear-out trends to suggest that the yield improves or deteriorates as time goes on with these particular rotations; the full benefit…	Journal of Agricultural Science	92		717-728			2021RGHL_CCLANT029	Yield averaged across 3 N treatments			Yes	Yes	No	ELCI	CI	England	Cambridge University Farm	52.228	0.08	Split-plot	36.6x5.5	201.3	6		3		15	Plot size for main plot (rotation)									2	0	2	0	1	4	High	1953-58	1970-75
2021RGHL_CCLANT029	F. Hanley; W.J. Ridgman	1979	Results from three cycles of six-course rotations on light land	A rotation experiment comparing the effects of length, type and management of leys on three test crops in six-course rotations during three cycles is described and the results discussed. Although the yields of the test crops varied from cycle to cycle there were no clear-out trends to suggest that the yield improves or deteriorates as time goes on with these particular rotations; the full benefit…	Journal of Agricultural Science	92		717-728			2021RGHL_CCLANT029	Yield averaged across 3 N treatments			Yes	Yes	No	ELCI	CI	England	Cambridge University Farm	52.228	0.08	Split-plot	36.6x5.5	201.3	6		3		15	Plot size for main plot (rotation)									2	0	2	0	1	4	High	1953-58	1970-75
2021RGHL_CCLANT029	F. Hanley; W.J. Ridgman	1979	Results from three cycles of six-course rotations on light land	A rotation experiment comparing the effects of length, type and management of leys on three test crops in six-course rotations during three cycles is described and the results discussed. Although the yields of the test crops varied from cycle to cycle there were no clear-out trends to suggest that the yield improves or deteriorates as time goes on with these particular rotations; the full benefit…	Journal of Agricultural Science	92		717-728			2021RGHL_CCLANT029	Yield averaged across 3 N treatments			Yes	Yes	No	ELCI	CI	England	Cambridge University Farm	52.228	0.08	Split-plot	36.6x5.5	201.3	6		3		15	Plot size for main plot (rotation)									2	0	2	0	1	4	High	1953-58	1970-75
2021RGHL_CCLANT029	F. Hanley; W.J. Ridgman	1979	Results from three cycles of six-course rotations on light land	A rotation experiment comparing the effects of length, type and management of leys on three test crops in six-course rotations during three cycles is described and the results discussed. Although the yields of the test crops varied from cycle to cycle there were no clear-out trends to suggest that the yield improves or deteriorates as time goes on with these particular rotations; the full benefit…	Journal of Agricultural Science	92		717-728			2021RGHL_CCLANT029	Yield averaged across 3 N treatments			Yes	Yes	No	ELCI	CI	England	Cambridge University Farm	52.228	0.08	Split-plot	36.6x5.5	201.3	6		3		15	Plot size for main plot (rotation)									2	0	2	0	1	4	High	1953-58	1970-75
2021RGHL_CCLANT029	F. Hanley; W.J. Ridgman	1979	Results from three cycles of six-course rotations on light land	A rotation experiment comparing the effects of length, type and management of leys on three test crops in six-course rotations during three cycles is described and the results discussed. Although the yields of the test crops varied from cycle to cycle there were no clear-out trends to suggest that the yield improves or deteriorates as time goes on with these particular rotations; the full benefit…	Journal of Agricultural Science	92		717-728			2021RGHL_CCLANT029	Yield averaged across 3 N treatments			Yes	Yes	No	ELCI	CI	England	Cambridge University Farm	52.228	0.08	Split-plot	36.6x5.5	201.3	6		3		15	Plot size for main plot (rotation)									2	0	2	0	1	4	High	1953-58	1970-75
2021RGHL_CCLANT029	F. Hanley; W.J. Ridgman	1979	Results from three cycles of six-course rotations on light land	A rotation experiment comparing the effects of length, type and management of leys on three test crops in six-course rotations during three cycles is described and the results discussed. Although the yields of the test crops varied from cycle to cycle there were no clear-out trends to suggest that the yield improves or deteriorates as time goes on with these particular rotations; the full benefit…	Journal of Agricultural Science	92		717-728			2021RGHL_CCLANT029	Yield averaged across 3 N treatments			Yes	Yes	No	ELCI	CI	England	Cambridge University Farm	52.228	0.08	Split-plot	36.6x5.5	201.3	6		3		15	Plot size for main plot (rotation)									2	0	2	0	1	4	High	1953-58	1970-75
2021RGHL_CCLANT029	F. Hanley; W.J. Ridgman	1979	Results from three cycles of six-course rotations on light land	A rotation experiment comparing the effects of length, type and management of leys on three test crops in six-course rotations during three cycles is described and the results discussed. Although the yields of the test crops varied from cycle to cycle there were no clear-out trends to suggest that the yield improves or deteriorates as time goes on with these particular rotations; the full benefit…	Journal of Agricultural Science	92		717-728			2021RGHL_CCLANT029	Yield averaged across 3 N treatments			Yes	Yes	No	ELCI	CI	England	Cambridge University Farm	52.228	0.08	Split-plot	36.6x5.5	201.3	6		3		15	Plot size for main plot (rotation)									2	0	2	0	1	4	High	1953-58	1970-75
2021RGHL_CCLANT029	F. Hanley; W.J. Ridgman	1979	Results from three cycles of six-course rotations on light land	A rotation experiment comparing the effects of length, type and management of leys on three test crops in six-course rotations during three cycles is described and the results discussed. Although the yields of the test crops varied from cycle to cycle there were no clear-out trends to suggest that the yield improves or deteriorates as time goes on with these particular rotations; the full benefit…	Journal of Agricultural Science	92		717-728			2021RGHL_CCLANT029	Yield averaged across 3 N treatments			Yes	Yes	No	ELCI	CI	England	Cambridge University Farm	52.228	0.08	Split-plot	36.6x5.5	201.3	6		3		15	Plot size for main plot (rotation)									2	0	2	0	1	4	High	1953-58	1970-75
2020UPDTCCLA003	R. D. Armstrong; R. Perris; M. Munn; K. Dunsford; F. Robertson; G. J. Hollaway; G. J. O'Leary	2019	Effects of long-term rotation and tillage practice on grain yield and protein of wheat and soil fertility on a vertosol in a medium-rainfall temperate environment	Fundamental changes in farming systems occurred throughout the medium-rainfall zone of southern Australia during the late 1990s. Pulse and canola crops replaced pastures and long-fallowing, and minimal-tillage practices were increasingly adopted. An experiment was established in 1998 to examine long-term effects of these changes on crop productivity and soil fertility. Nine rotation-tillage treat…	Crop & Pasture Science	70	1	2015-01-01			2020UPDTCCLA003		Yes	Yes	Yes	Yes	Yes	BACI	ELCI	Australia	Longerenong	-36.84	142.818	Phase-replicated	14x36	504	3		18		15		Grey Vertosol	46	17	29	1.07	7.7	CaCl2	Values for 0-10cm. Also present H2O pH	1	0	2	0	0	3	Low	1998	2017
2020UPDTCCLA003	R. D. Armstrong; R. Perris; M. Munn; K. Dunsford; F. Robertson; G. J. Hollaway; G. J. O'Leary	2019	Effects of long-term rotation and tillage practice on grain yield and protein of wheat and soil fertility on a vertosol in a medium-rainfall temperate environment	Fundamental changes in farming systems occurred throughout the medium-rainfall zone of southern Australia during the late 1990s. Pulse and canola crops replaced pastures and long-fallowing, and minimal-tillage practices were increasingly adopted. An experiment was established in 1998 to examine long-term effects of these changes on crop productivity and soil fertility. Nine rotation-tillage treat…	Crop & Pasture Science	70	1	2015-01-01			2020UPDTCCLA003		Yes	Yes	Yes	Yes	Yes	BACI	ELCI	Australia	Longerenong	-36.84	142.818	Phase-replicated	14x36	504	3		18		15		Grey Vertosol	46	17	29	1.07	7.7	CaCl2	Values for 0-10cm. Also present H2O pH	1	0	2	0	0	3	Low	1998	2017
2020UPDTCCLA003	R. D. Armstrong; R. Perris; M. Munn; K. Dunsford; F. Robertson; G. J. Hollaway; G. J. O'Leary	2019	Effects of long-term rotation and tillage practice on grain yield and protein of wheat and soil fertility on a vertosol in a medium-rainfall temperate environment	Fundamental changes in farming systems occurred throughout the medium-rainfall zone of southern Australia during the late 1990s. Pulse and canola crops replaced pastures and long-fallowing, and minimal-tillage practices were increasingly adopted. An experiment was established in 1998 to examine long-term effects of these changes on crop productivity and soil fertility. Nine rotation-tillage treat…	Crop & Pasture Science	70	1	2015-01-01			2020UPDTCCLA003		Yes	Yes	Yes	Yes	Yes	BACI	ELCI	Australia	Longerenong	-36.84	142.818	Phase-replicated	14x36	504	3		18		15		Grey Vertosol	46	17	29	1.07	7.7	CaCl2	Values for 0-10cm. Also present H2O pH	1	0	2	0	0	3	Low	1998	2017
2020UPDTCCLA003	R. D. Armstrong; R. Perris; M. Munn; K. Dunsford; F. Robertson; G. J. Hollaway; G. J. O'Leary	2019	Effects of long-term rotation and tillage practice on grain yield and protein of wheat and soil fertility on a vertosol in a medium-rainfall temperate environment	Fundamental changes in farming systems occurred throughout the medium-rainfall zone of southern Australia during the late 1990s. Pulse and canola crops replaced pastures and long-fallowing, and minimal-tillage practices were increasingly adopted. An experiment was established in 1998 to examine long-term effects of these changes on crop productivity and soil fertility. Nine rotation-tillage treat…	Crop & Pasture Science	70	1	2015-01-01			2020UPDTCCLA003		Yes	Yes	Yes	Yes	Yes	BACI	ELCI	Australia	Longerenong	-36.84	142.818	Phase-replicated	14x36	504	3		18		15		Grey Vertosol	46	17	29	1.07	7.7	CaCl2	Values for 0-10cm. Also present H2O pH	1	0	2	0	0	3	Low	1998	2017
2020UPDTCCLA003	R. D. Armstrong; R. Perris; M. Munn; K. Dunsford; F. Robertson; G. J. Hollaway; G. J. O'Leary	2019	Effects of long-term rotation and tillage practice on grain yield and protein of wheat and soil fertility on a vertosol in a medium-rainfall temperate environment	Fundamental changes in farming systems occurred throughout the medium-rainfall zone of southern Australia during the late 1990s. Pulse and canola crops replaced pastures and long-fallowing, and minimal-tillage practices were increasingly adopted. An experiment was established in 1998 to examine long-term effects of these changes on crop productivity and soil fertility. Nine rotation-tillage treat…	Crop & Pasture Science	70	1	2015-01-01			2020UPDTCCLA003		Yes	Yes	Yes	Yes	Yes	BACI	ELCI	Australia	Longerenong	-36.84	142.818	Phase-replicated	14x36	504	3		18		15		Grey Vertosol	46	17	29	1.07	7.7	CaCl2	Values for 0-10cm. Also present H2O pH	1	0	2	0	0	3	Low	1998	2017
2020UPDTCCLA003	R. D. Armstrong; R. Perris; M. Munn; K. Dunsford; F. Robertson; G. J. Hollaway; G. J. O'Leary	2019	Effects of long-term rotation and tillage practice on grain yield and protein of wheat and soil fertility on a vertosol in a medium-rainfall temperate environment	Fundamental changes in farming systems occurred throughout the medium-rainfall zone of southern Australia during the late 1990s. Pulse and canola crops replaced pastures and long-fallowing, and minimal-tillage practices were increasingly adopted. An experiment was established in 1998 to examine long-term effects of these changes on crop productivity and soil fertility. Nine rotation-tillage treat…	Crop & Pasture Science	70	1	2015-01-01			2020UPDTCCLA003		Yes	Yes	Yes	Yes	Yes	BACI	ELCI	Australia	Longerenong	-36.84	142.818	Phase-replicated	14x36	504	3		18		15		Grey Vertosol	46	17	29	1.07	7.7	CaCl2	Values for 0-10cm. Also present H2O pH	1	0	2	0	0	3	Low	1998	2017
2020UPDTCCLA003	R. D. Armstrong; R. Perris; M. Munn; K. Dunsford; F. Robertson; G. J. Hollaway; G. J. O'Leary	2019	Effects of long-term rotation and tillage practice on grain yield and protein of wheat and soil fertility on a vertosol in a medium-rainfall temperate environment	Fundamental changes in farming systems occurred throughout the medium-rainfall zone of southern Australia during the late 1990s. Pulse and canola crops replaced pastures and long-fallowing, and minimal-tillage practices were increasingly adopted. An experiment was established in 1998 to examine long-term effects of these changes on crop productivity and soil fertility. Nine rotation-tillage treat…	Crop & Pasture Science	70	1	2015-01-01			2020UPDTCCLA003		Yes	Yes	Yes	Yes	Yes	BACI	ELCI	Australia	Longerenong	-36.84	142.818	Phase-replicated	14x36	504	3		18		15		Grey Vertosol	46	17	29	1.07	7.7	CaCl2	Values for 0-10cm. Also present H2O pH	1	0	2	0	0	3	Low	1998	2017
2020UPDTCCLA003	R. D. Armstrong; R. Perris; M. Munn; K. Dunsford; F. Robertson; G. J. Hollaway; G. J. O'Leary	2019	Effects of long-term rotation and tillage practice on grain yield and protein of wheat and soil fertility on a vertosol in a medium-rainfall temperate environment	Fundamental changes in farming systems occurred throughout the medium-rainfall zone of southern Australia during the late 1990s. Pulse and canola crops replaced pastures and long-fallowing, and minimal-tillage practices were increasingly adopted. An experiment was established in 1998 to examine long-term effects of these changes on crop productivity and soil fertility. Nine rotation-tillage treat…	Crop & Pasture Science	70	1	2015-01-01			2020UPDTCCLA003		Yes	Yes	Yes	Yes	Yes	BACI	ELCI	Australia	Longerenong	-36.84	142.818	Phase-replicated	14x36	504	3		18		15		Grey Vertosol	46	17	29	1.07	7.7	CaCl2	Values for 0-10cm. Also present H2O pH	1	0	2	0	0	3	Low	1998	2017
2020UPDTCCLA003	R. D. Armstrong; R. Perris; M. Munn; K. Dunsford; F. Robertson; G. J. Hollaway; G. J. O'Leary	2019	Effects of long-term rotation and tillage practice on grain yield and protein of wheat and soil fertility on a vertosol in a medium-rainfall temperate environment	Fundamental changes in farming systems occurred throughout the medium-rainfall zone of southern Australia during the late 1990s. Pulse and canola crops replaced pastures and long-fallowing, and minimal-tillage practices were increasingly adopted. An experiment was established in 1998 to examine long-term effects of these changes on crop productivity and soil fertility. Nine rotation-tillage treat…	Crop & Pasture Science	70	1	2015-01-01			2020UPDTCCLA003		Yes	Yes	Yes	Yes	Yes	BACI	ELCI	Australia	Longerenong	-36.84	142.818	Phase-replicated	14x36	504	3		18		15		Grey Vertosol	46	17	29	1.07	7.7	CaCl2	Values for 0-10cm. Also present H2O pH	1	0	2	0	0	3	Low	1998	2017
2020UPDTCCLA037_2016UPDT014	B. Dimassi; B. Mary; R. Wylleman; J. Labreuche; D. Couture; F. Piraux; J.-P. Cohan	2014	Long-term effect of contrasted tillage and crop management on soil carbon dynamics during 41 years	Although numerous studies have been conducted on the effect of tillage on soil organic carbon (SOC), there is still no consensus on the importance of sequestration which can be expected from reduced tillage. Most studies have used a synchronic approach in fields or long-term experiments which were often poorly characterized with respect to initial conditions. In this paper, we used a diachronic a…	Agriculture Ecosystems & Environment	188		134-146			2020UPDTCCLA037_2016UPDT014		Yes	Yes		Yes	No	BACI	ELCI	France	Arvalis-Institut du Végétal, Boigneville	48.33	2.38	Randomised block with split plots			4		3		4			24.6	64.5	7.5	1.45	6.9	H2O		1	0	2	0	2	3	High	1970	2011
2020UPDTCCLA037_2016UPDT014	B. Dimassi; B. Mary; R. Wylleman; J. Labreuche; D. Couture; F. Piraux; J.-P. Cohan	2014	Long-term effect of contrasted tillage and crop management on soil carbon dynamics during 41 years	Although numerous studies have been conducted on the effect of tillage on soil organic carbon (SOC), there is still no consensus on the importance of sequestration which can be expected from reduced tillage. Most studies have used a synchronic approach in fields or long-term experiments which were often poorly characterized with respect to initial conditions. In this paper, we used a diachronic a…	Agriculture Ecosystems & Environment	188		134-146			2020UPDTCCLA037_2016UPDT014		Yes	Yes		Yes	No	BACI	ELCI	France	Arvalis-Institut du Végétal, Boigneville	48.33	2.38	Randomised block with split plots			4		3		4			24.6	64.5	7.5	1.45	6.9	H2O		1	0	2	0	2	3	High	2002	2011
2020UPDTCCLA037_2016UPDT014	B. Dimassi; B. Mary; R. Wylleman; J. Labreuche; D. Couture; F. Piraux; J.-P. Cohan	2014	Long-term effect of contrasted tillage and crop management on soil carbon dynamics during 41 years	Although numerous studies have been conducted on the effect of tillage on soil organic carbon (SOC), there is still no consensus on the importance of sequestration which can be expected from reduced tillage. Most studies have used a synchronic approach in fields or long-term experiments which were often poorly characterized with respect to initial conditions. In this paper, we used a diachronic a…	Agriculture Ecosystems & Environment	188		134-146			2020UPDTCCLA037_2016UPDT014		Yes	Yes		Yes	No	BACI	ELCI	France	Arvalis-Institut du Végétal, Boigneville	48.33	2.38	Randomised block with split plots			4		3		4			24.6	64.5	7.5	1.45	6.9	H2O		1	0	2	0	2	3	High	1998	2011
2020UPDTCCLA037_2016UPDT014	B. Dimassi; B. Mary; R. Wylleman; J. Labreuche; D. Couture; F. Piraux; J.-P. Cohan	2014	Long-term effect of contrasted tillage and crop management on soil carbon dynamics during 41 years	Although numerous studies have been conducted on the effect of tillage on soil organic carbon (SOC), there is still no consensus on the importance of sequestration which can be expected from reduced tillage. Most studies have used a synchronic approach in fields or long-term experiments which were often poorly characterized with respect to initial conditions. In this paper, we used a diachronic a…	Agriculture Ecosystems & Environment	188		134-146			2020UPDTCCLA037_2016UPDT014		Yes	Yes		Yes	No	BACI	ELCI	France	Arvalis-Institut du Végétal, Boigneville	48.33	2.38	Randomised block with split plots			4		3		4			24.6	64.5	7.5	1.45	6.9	H2O		1	0	2	0	2	3	High	1998	2011
2020UPDTCCLA037_2016UPDT014	B. Dimassi; B. Mary; R. Wylleman; J. Labreuche; D. Couture; F. Piraux; J.-P. Cohan	2014	Long-term effect of contrasted tillage and crop management on soil carbon dynamics during 41 years	Although numerous studies have been conducted on the effect of tillage on soil organic carbon (SOC), there is still no consensus on the importance of sequestration which can be expected from reduced tillage. Most studies have used a synchronic approach in fields or long-term experiments which were often poorly characterized with respect to initial conditions. In this paper, we used a diachronic a…	Agriculture Ecosystems & Environment	188		134-146			2020UPDTCCLA037_2016UPDT014		Yes	Yes		Yes	No	BACI	ELCI	France	Arvalis-Institut du Végétal, Boigneville	48.33	2.38	Randomised block with split plots			4		3		4			24.6	64.5	7.5	1.45	6.9	H2O		1	0	2	0	2	3	High	2002	2011
2020UPDTCCLA037_2016UPDT014	B. Dimassi; B. Mary; R. Wylleman; J. Labreuche; D. Couture; F. Piraux; J.-P. Cohan	2014	Long-term effect of contrasted tillage and crop management on soil carbon dynamics during 41 years	Although numerous studies have been conducted on the effect of tillage on soil organic carbon (SOC), there is still no consensus on the importance of sequestration which can be expected from reduced tillage. Most studies have used a synchronic approach in fields or long-term experiments which were often poorly characterized with respect to initial conditions. In this paper, we used a diachronic a…	Agriculture Ecosystems & Environment	188		134-146			2020UPDTCCLA037_2016UPDT014		Yes	Yes		Yes	No	BACI	ELCI	France	Arvalis-Institut du Végétal, Boigneville	48.33	2.38	Randomised block with split plots			4		3		4			24.6	64.5	7.5	1.45	6.9	H2O		1	0	2	0	2	3	High	1982	2011
2020UPDTCCLA037_2016UPDT014	B. Dimassi; B. Mary; R. Wylleman; J. Labreuche; D. Couture; F. Piraux; J.-P. Cohan	2014	Long-term effect of contrasted tillage and crop management on soil carbon dynamics during 41 years	Although numerous studies have been conducted on the effect of tillage on soil organic carbon (SOC), there is still no consensus on the importance of sequestration which can be expected from reduced tillage. Most studies have used a synchronic approach in fields or long-term experiments which were often poorly characterized with respect to initial conditions. In this paper, we used a diachronic a…	Agriculture Ecosystems & Environment	188		134-146			2020UPDTCCLA037_2016UPDT014		Yes	Yes		Yes	No	BACI	ELCI	France	Arvalis-Institut du Végétal, Boigneville	48.33	2.38	Randomised block with split plots			4		3		4			23.7	65.7	7.9	1.45	6.7	H2O		1	0	2	0	2	3	High	1970	2011
2020UPDTCCLA037_2016UPDT014	B. Dimassi; B. Mary; R. Wylleman; J. Labreuche; D. Couture; F. Piraux; J.-P. Cohan	2014	Long-term effect of contrasted tillage and crop management on soil carbon dynamics during 41 years	Although numerous studies have been conducted on the effect of tillage on soil organic carbon (SOC), there is still no consensus on the importance of sequestration which can be expected from reduced tillage. Most studies have used a synchronic approach in fields or long-term experiments which were often poorly characterized with respect to initial conditions. In this paper, we used a diachronic a…	Agriculture Ecosystems & Environment	188		134-146			2020UPDTCCLA037_2016UPDT014		Yes	Yes		Yes	No	BACI	ELCI	France	Arvalis-Institut du Végétal, Boigneville	48.33	2.38	Randomised block with split plots			4		3		4			23.7	65.7	7.9	1.45	6.7	H2O		1	0	2	0	2	3	High	2002	2011
2020UPDTCCLA037_2016UPDT014	B. Dimassi; B. Mary; R. Wylleman; J. Labreuche; D. Couture; F. Piraux; J.-P. Cohan	2014	Long-term effect of contrasted tillage and crop management on soil carbon dynamics during 41 years	Although numerous studies have been conducted on the effect of tillage on soil organic carbon (SOC), there is still no consensus on the importance of sequestration which can be expected from reduced tillage. Most studies have used a synchronic approach in fields or long-term experiments which were often poorly characterized with respect to initial conditions. In this paper, we used a diachronic a…	Agriculture Ecosystems & Environment	188		134-146			2020UPDTCCLA037_2016UPDT014		Yes	Yes		Yes	No	BACI	ELCI	France	Arvalis-Institut du Végétal, Boigneville	48.33	2.38	Randomised block with split plots			4		3		4			23.7	65.7	7.9	1.45	6.7	H2O		1	0	2	0	2	3	High	1998	2011
2020UPDTCCLA037_2016UPDT014	B. Dimassi; B. Mary; R. Wylleman; J. Labreuche; D. Couture; F. Piraux; J.-P. Cohan	2014	Long-term effect of contrasted tillage and crop management on soil carbon dynamics during 41 years	Although numerous studies have been conducted on the effect of tillage on soil organic carbon (SOC), there is still no consensus on the importance of sequestration which can be expected from reduced tillage. Most studies have used a synchronic approach in fields or long-term experiments which were often poorly characterized with respect to initial conditions. In this paper, we used a diachronic a…	Agriculture Ecosystems & Environment	188		134-146			2020UPDTCCLA037_2016UPDT014		Yes	Yes		Yes	No	BACI	ELCI	France	Arvalis-Institut du Végétal, Boigneville	48.33	2.38	Randomised block with split plots			4		3		4			23.7	65.7	7.9	1.45	6.7	H2O		1	0	2	0	2	3	High	1998	2011
2020UPDTCCLA037_2016UPDT014	B. Dimassi; B. Mary; R. Wylleman; J. Labreuche; D. Couture; F. Piraux; J.-P. Cohan	2014	Long-term effect of contrasted tillage and crop management on soil carbon dynamics during 41 years	Although numerous studies have been conducted on the effect of tillage on soil organic carbon (SOC), there is still no consensus on the importance of sequestration which can be expected from reduced tillage. Most studies have used a synchronic approach in fields or long-term experiments which were often poorly characterized with respect to initial conditions. In this paper, we used a diachronic a…	Agriculture Ecosystems & Environment	188		134-146			2020UPDTCCLA037_2016UPDT014		Yes	Yes		Yes	No	BACI	ELCI	France	Arvalis-Institut du Végétal, Boigneville	48.33	2.38	Randomised block with split plots			4		3		4			23.7	65.7	7.9	1.45	6.7	H2O		1	0	2	0	2	3	High	2002	2011
2020UPDTCCLA037_2016UPDT014	B. Dimassi; B. Mary; R. Wylleman; J. Labreuche; D. Couture; F. Piraux; J.-P. Cohan	2014	Long-term effect of contrasted tillage and crop management on soil carbon dynamics during 41 years	Although numerous studies have been conducted on the effect of tillage on soil organic carbon (SOC), there is still no consensus on the importance of sequestration which can be expected from reduced tillage. Most studies have used a synchronic approach in fields or long-term experiments which were often poorly characterized with respect to initial conditions. In this paper, we used a diachronic a…	Agriculture Ecosystems & Environment	188		134-146			2020UPDTCCLA037_2016UPDT014		Yes	Yes		Yes	No	BACI	ELCI	France	Arvalis-Institut du Végétal, Boigneville	48.33	2.38	Randomised block with split plots			4		3		4			23.7	65.7	7.9	1.45	6.7	H2O		1	0	2	0	2	3	High	1982	2011
2020UPDTCCLA037_2016UPDT014	B. Dimassi; B. Mary; R. Wylleman; J. Labreuche; D. Couture; F. Piraux; J.-P. Cohan	2014	Long-term effect of contrasted tillage and crop management on soil carbon dynamics during 41 years	Although numerous studies have been conducted on the effect of tillage on soil organic carbon (SOC), there is still no consensus on the importance of sequestration which can be expected from reduced tillage. Most studies have used a synchronic approach in fields or long-term experiments which were often poorly characterized with respect to initial conditions. In this paper, we used a diachronic a…	Agriculture Ecosystems & Environment	188		134-146			2020UPDTCCLA037_2016UPDT014		Yes	Yes		Yes	No	BACI	ELCI	France	Arvalis-Institut du Végétal, Boigneville	48.33	2.38	Randomised block with split plots			4		3		4			23.4	65.3	8.1	1.45	6.6	H2O		1	0	2	0	2	3	High	1970	2011
2020UPDTCCLA037_2016UPDT014	B. Dimassi; B. Mary; R. Wylleman; J. Labreuche; D. Couture; F. Piraux; J.-P. Cohan	2014	Long-term effect of contrasted tillage and crop management on soil carbon dynamics during 41 years	Although numerous studies have been conducted on the effect of tillage on soil organic carbon (SOC), there is still no consensus on the importance of sequestration which can be expected from reduced tillage. Most studies have used a synchronic approach in fields or long-term experiments which were often poorly characterized with respect to initial conditions. In this paper, we used a diachronic a…	Agriculture Ecosystems & Environment	188		134-146			2020UPDTCCLA037_2016UPDT014		Yes	Yes		Yes	No	BACI	ELCI	France	Arvalis-Institut du Végétal, Boigneville	48.33	2.38	Randomised block with split plots			4		3		4			23.4	65.3	8.1	1.45	6.6	H2O		1	0	2	0	2	3	High	2002	2011
2020UPDTCCLA037_2016UPDT014	B. Dimassi; B. Mary; R. Wylleman; J. Labreuche; D. Couture; F. Piraux; J.-P. Cohan	2014	Long-term effect of contrasted tillage and crop management on soil carbon dynamics during 41 years	Although numerous studies have been conducted on the effect of tillage on soil organic carbon (SOC), there is still no consensus on the importance of sequestration which can be expected from reduced tillage. Most studies have used a synchronic approach in fields or long-term experiments which were often poorly characterized with respect to initial conditions. In this paper, we used a diachronic a…	Agriculture Ecosystems & Environment	188		134-146			2020UPDTCCLA037_2016UPDT014		Yes	Yes		Yes	No	BACI	ELCI	France	Arvalis-Institut du Végétal, Boigneville	48.33	2.38	Randomised block with split plots			4		3		4			23.4	65.3	8.1	1.45	6.6	H2O		1	0	2	0	2	3	High	1998	2011
2020UPDTCCLA037_2016UPDT014	B. Dimassi; B. Mary; R. Wylleman; J. Labreuche; D. Couture; F. Piraux; J.-P. Cohan	2014	Long-term effect of contrasted tillage and crop management on soil carbon dynamics during 41 years	Although numerous studies have been conducted on the effect of tillage on soil organic carbon (SOC), there is still no consensus on the importance of sequestration which can be expected from reduced tillage. Most studies have used a synchronic approach in fields or long-term experiments which were often poorly characterized with respect to initial conditions. In this paper, we used a diachronic a…	Agriculture Ecosystems & Environment	188		134-146			2020UPDTCCLA037_2016UPDT014		Yes	Yes		Yes	No	BACI	ELCI	France	Arvalis-Institut du Végétal, Boigneville	48.33	2.38	Randomised block with split plots			4		3		4			23.4	65.3	8.1	1.45	6.6	H2O		1	0	2	0	2	3	High	1998	2011
2020UPDTCCLA037_2016UPDT014	B. Dimassi; B. Mary; R. Wylleman; J. Labreuche; D. Couture; F. Piraux; J.-P. Cohan	2014	Long-term effect of contrasted tillage and crop management on soil carbon dynamics during 41 years	Although numerous studies have been conducted on the effect of tillage on soil organic carbon (SOC), there is still no consensus on the importance of sequestration which can be expected from reduced tillage. Most studies have used a synchronic approach in fields or long-term experiments which were often poorly characterized with respect to initial conditions. In this paper, we used a diachronic a…	Agriculture Ecosystems & Environment	188		134-146			2020UPDTCCLA037_2016UPDT014		Yes	Yes		Yes	No	BACI	ELCI	France	Arvalis-Institut du Végétal, Boigneville	48.33	2.38	Randomised block with split plots			4		3		4			23.4	65.3	8.1	1.45	6.6	H2O		1	0	2	0	2	3	High	2002	2011
2020UPDTCCLA037_2016UPDT014	B. Dimassi; B. Mary; R. Wylleman; J. Labreuche; D. Couture; F. Piraux; J.-P. Cohan	2014	Long-term effect of contrasted tillage and crop management on soil carbon dynamics during 41 years	Although numerous studies have been conducted on the effect of tillage on soil organic carbon (SOC), there is still no consensus on the importance of sequestration which can be expected from reduced tillage. Most studies have used a synchronic approach in fields or long-term experiments which were often poorly characterized with respect to initial conditions. In this paper, we used a diachronic a…	Agriculture Ecosystems & Environment	188		134-146			2020UPDTCCLA037_2016UPDT014		Yes	Yes		Yes	No	BACI	ELCI	France	Arvalis-Institut du Végétal, Boigneville	48.33	2.38	Randomised block with split plots			4		3		4			23.4	65.3	8.1	1.45	6.6	H2O		1	0	2	0	2	3	High	1982	2011
2020UPDTCCLA061	T. Hu; P. Sorensen; J. E. Olesen	2018	Soil carbon varies between different organic and conventional management schemes in arable agriculture	The effects of organic versus conventional farming systems on changes in soil organic carbon (SOC) has long been debated. The effects of such comparisons may depend considerably on the design of the respective systems and climate and soil conditions under which they are performed. Here, we compare a range of arable organic and conventional crop systems at three sites (Jyndevad, Foulum and Flakkeb…	European Journal of Agronomy	94		79-88		A. Shah, M. Askegaard, I. A. Rasmussen, E. M. Cordoba Jimenez, J. E. Olesen (2017) Productivity of organic and conventional arable cropping systems in long- term experiments in Denmark. European Journal of Agronomy 90: 12-22; J. E. Olesen, E. M. Hansen, M. Askegaard, I. A. Rasmussen (2007) The value of catch crops and organic manures for spring barley in organic arable farming. Field Crops Resear…	2020UPDTCCLA061a	SOC calculated from Table 4 and Section 2.1 Hu 2018, see Supplementary file		Yes	Yes	No	No	BACI	ELCI	Denmark	Jyndevad	54.901	9.152	Fully factorial		378	8	2 replicates of each phase of 4-course rotation, where each phase of rotation present every year, so 8 replicates overall	3		8		Orthic Haplohumod	4.5			1.572	6	NS		2	0	2	0	1	4	High	1997	2004
2020UPDTCCLA061	T. Hu; P. Sorensen; J. E. Olesen	2018	Soil carbon varies between different organic and conventional management schemes in arable agriculture	The effects of organic versus conventional farming systems on changes in soil organic carbon (SOC) has long been debated. The effects of such comparisons may depend considerably on the design of the respective systems and climate and soil conditions under which they are performed. Here, we compare a range of arable organic and conventional crop systems at three sites (Jyndevad, Foulum and Flakkeb…	European Journal of Agronomy	94		79-88		A. Shah, M. Askegaard, I. A. Rasmussen, E. M. Cordoba Jimenez, J. E. Olesen (2017) Productivity of organic and conventional arable cropping systems in long- term experiments in Denmark. European Journal of Agronomy 90: 12-22; J. E. Olesen, E. M. Hansen, M. Askegaard, I. A. Rasmussen (2007) The value of catch crops and organic manures for spring barley in organic arable farming. Field Crops Resear…	2020UPDTCCLA061a	SOC calculated from Table 4 and Section 2.1 Hu 2018, see Supplementary file		Yes	Yes	No	No	BACI	ELCI	Denmark	Jyndevad	54.901	9.152	Fully factorial		378	8	2 replicates of each phase of 4-course rotation, where each phase of rotation present every year, so 8 replicates overall	3		8		Orthic Haplohumod	4.5			1.572	6	NS		2	0	2	0	1	4	High	1997	2004
2020UPDTCCLA061	T. Hu; P. Sorensen; J. E. Olesen	2018	Soil carbon varies between different organic and conventional management schemes in arable agriculture	The effects of organic versus conventional farming systems on changes in soil organic carbon (SOC) has long been debated. The effects of such comparisons may depend considerably on the design of the respective systems and climate and soil conditions under which they are performed. Here, we compare a range of arable organic and conventional crop systems at three sites (Jyndevad, Foulum and Flakkeb…	European Journal of Agronomy	94		79-88		A. Shah, M. Askegaard, I. A. Rasmussen, E. M. Cordoba Jimenez, J. E. Olesen (2017) Productivity of organic and conventional arable cropping systems in long- term experiments in Denmark. European Journal of Agronomy 90: 12-22; J. E. Olesen, E. M. Hansen, M. Askegaard, I. A. Rasmussen (2007) The value of catch crops and organic manures for spring barley in organic arable farming. Field Crops Resear…	2020UPDTCCLA061a	SOC calculated from Table 4 and Section 2.1 Hu 2018, see Supplementary file		Yes	Yes	No	No	BACI	ELCI	Denmark	Jyndevad	54.901	9.152	Fully factorial		378	8	2 replicates of each phase of 4-course rotation, where each phase of rotation present every year, so 8 replicates overall	3		8		Orthic Haplohumod	4.5			1.572	6	NS		2	0	2	0	1	4	High	1997	2004
2020UPDTCCLA061	T. Hu; P. Sorensen; J. E. Olesen	2018	Soil carbon varies between different organic and conventional management schemes in arable agriculture	The effects of organic versus conventional farming systems on changes in soil organic carbon (SOC) has long been debated. The effects of such comparisons may depend considerably on the design of the respective systems and climate and soil conditions under which they are performed. Here, we compare a range of arable organic and conventional crop systems at three sites (Jyndevad, Foulum and Flakkeb…	European Journal of Agronomy	94		79-88		A. Shah, M. Askegaard, I. A. Rasmussen, E. M. Cordoba Jimenez, J. E. Olesen (2017) Productivity of organic and conventional arable cropping systems in long- term experiments in Denmark. European Journal of Agronomy 90: 12-22; J. E. Olesen, E. M. Hansen, M. Askegaard, I. A. Rasmussen (2007) The value of catch crops and organic manures for spring barley in organic arable farming. Field Crops Resear…	2020UPDTCCLA061a	SOC calculated from Table 4 and Section 2.1 Hu 2018, see Supplementary file		Yes	Yes	No	No	BACI	ELCI	Denmark	Jyndevad	54.901	9.152	Fully factorial		378	8	2 replicates of each phase of 4-course rotation, where each phase of rotation present every year, so 8 replicates overall	3		8		Orthic Haplohumod	4.5			1.572	6	NS		2	0	2	0	1	4	High	1997	2004
2020UPDTCCLA061	T. Hu; P. Sorensen; J. E. Olesen	2018	Soil carbon varies between different organic and conventional management schemes in arable agriculture	The effects of organic versus conventional farming systems on changes in soil organic carbon (SOC) has long been debated. The effects of such comparisons may depend considerably on the design of the respective systems and climate and soil conditions under which they are performed. Here, we compare a range of arable organic and conventional crop systems at three sites (Jyndevad, Foulum and Flakkeb…	European Journal of Agronomy	94		79-88		A. Shah, M. Askegaard, I. A. Rasmussen, E. M. Cordoba Jimenez, J. E. Olesen (2017) Productivity of organic and conventional arable cropping systems in long- term experiments in Denmark. European Journal of Agronomy 90: 12-22; J. E. Olesen, E. M. Hansen, M. Askegaard, I. A. Rasmussen (2007) The value of catch crops and organic manures for spring barley in organic arable farming. Field Crops Resear…	2020UPDTCCLA061a	SOC calculated from Table 4 and Section 2.1 Hu 2018, see Supplementary file		Yes	Yes	No	No	BACI	ELCI	Denmark	Jyndevad	54.901	9.152	Fully factorial		378	8	2 replicates of each phase of 4-course rotation, where each phase of rotation present every year, so 8 replicates overall	3		8		Orthic Haplohumod	4.5			1.572	6	NS		2	0	2	0	1	4	High	1997	2004
2020UPDTCCLA061	T. Hu; P. Sorensen; J. E. Olesen	2018	Soil carbon varies between different organic and conventional management schemes in arable agriculture	The effects of organic versus conventional farming systems on changes in soil organic carbon (SOC) has long been debated. The effects of such comparisons may depend considerably on the design of the respective systems and climate and soil conditions under which they are performed. Here, we compare a range of arable organic and conventional crop systems at three sites (Jyndevad, Foulum and Flakkeb…	European Journal of Agronomy	94		79-88		A. Shah, M. Askegaard, I. A. Rasmussen, E. M. Cordoba Jimenez, J. E. Olesen (2017) Productivity of organic and conventional arable cropping systems in long- term experiments in Denmark. European Journal of Agronomy 90: 12-22; J. E. Olesen, E. M. Hansen, M. Askegaard, I. A. Rasmussen (2007) The value of catch crops and organic manures for spring barley in organic arable farming. Field Crops Resear…	2020UPDTCCLA061a	SOC calculated from Table 4 and Section 2.1 Hu 2018, see Supplementary file		Yes	Yes	No	No	BACI	ELCI	Denmark	Jyndevad	54.901	9.152	Fully factorial		378	8	2 replicates of each phase of 4-course rotation, where each phase of rotation present every year, so 8 replicates overall	3		8		Orthic Haplohumod	4.5			1.572	6	NS		2	0	2	0	1	4	High	1997	2008
2020UPDTCCLA061	T. Hu; P. Sorensen; J. E. Olesen	2018	Soil carbon varies between different organic and conventional management schemes in arable agriculture	The effects of organic versus conventional farming systems on changes in soil organic carbon (SOC) has long been debated. The effects of such comparisons may depend considerably on the design of the respective systems and climate and soil conditions under which they are performed. Here, we compare a range of arable organic and conventional crop systems at three sites (Jyndevad, Foulum and Flakkeb…	European Journal of Agronomy	94		79-88		A. Shah, M. Askegaard, I. A. Rasmussen, E. M. Cordoba Jimenez, J. E. Olesen (2017) Productivity of organic and conventional arable cropping systems in long- term experiments in Denmark. European Journal of Agronomy 90: 12-22; J. E. Olesen, E. M. Hansen, M. Askegaard, I. A. Rasmussen (2007) The value of catch crops and organic manures for spring barley in organic arable farming. Field Crops Resear…	2020UPDTCCLA061a	SOC calculated from Table 4 and Section 2.1 Hu 2018, see Supplementary file		Yes	Yes	No	No	BACI	ELCI	Denmark	Jyndevad	54.901	9.152	Fully factorial		378	8	2 replicates of each phase of 4-course rotation, where each phase of rotation present every year, so 8 replicates overall	3		8		Orthic Haplohumod	4.5			1.572	6	NS		2	0	2	0	1	4	High	1997	2008
2020UPDTCCLA061	T. Hu; P. Sorensen; J. E. Olesen	2018	Soil carbon varies between different organic and conventional management schemes in arable agriculture	The effects of organic versus conventional farming systems on changes in soil organic carbon (SOC) has long been debated. The effects of such comparisons may depend considerably on the design of the respective systems and climate and soil conditions under which they are performed. Here, we compare a range of arable organic and conventional crop systems at three sites (Jyndevad, Foulum and Flakkeb…	European Journal of Agronomy	94		79-88		A. Shah, M. Askegaard, I. A. Rasmussen, E. M. Cordoba Jimenez, J. E. Olesen (2017) Productivity of organic and conventional arable cropping systems in long- term experiments in Denmark. European Journal of Agronomy 90: 12-22; J. E. Olesen, E. M. Hansen, M. Askegaard, I. A. Rasmussen (2007) The value of catch crops and organic manures for spring barley in organic arable farming. Field Crops Resear…	2020UPDTCCLA061a	SOC calculated from Table 4 and Section 2.1 Hu 2018, see Supplementary file		Yes	Yes	No	No	BACI	ELCI	Denmark	Jyndevad	54.901	9.152	Fully factorial		378	8	2 replicates of each phase of 4-course rotation, where each phase of rotation present every year, so 8 replicates overall	3		8		Orthic Haplohumod	4.5			1.572	6	NS		2	0	2	0	1	4	High	1997	2008
2020UPDTCCLA061	T. Hu; P. Sorensen; J. E. Olesen	2018	Soil carbon varies between different organic and conventional management schemes in arable agriculture	The effects of organic versus conventional farming systems on changes in soil organic carbon (SOC) has long been debated. The effects of such comparisons may depend considerably on the design of the respective systems and climate and soil conditions under which they are performed. Here, we compare a range of arable organic and conventional crop systems at three sites (Jyndevad, Foulum and Flakkeb…	European Journal of Agronomy	94		79-88		A. Shah, M. Askegaard, I. A. Rasmussen, E. M. Cordoba Jimenez, J. E. Olesen (2017) Productivity of organic and conventional arable cropping systems in long- term experiments in Denmark. European Journal of Agronomy 90: 12-22; J. E. Olesen, E. M. Hansen, M. Askegaard, I. A. Rasmussen (2007) The value of catch crops and organic manures for spring barley in organic arable farming. Field Crops Resear…	2020UPDTCCLA061a	SOC calculated from Table 4 and Section 2.1 Hu 2018, see Supplementary file		Yes	Yes	No	No	BACI	ELCI	Denmark	Jyndevad	54.901	9.152	Fully factorial		378	8	2 replicates of each phase of 4-course rotation, where each phase of rotation present every year, so 8 replicates overall	3		8		Orthic Haplohumod	4.5			1.572	6	NS		2	0	2	0	1	4	High	2005	2008
2020UPDTCCLA061	T. Hu; P. Sorensen; J. E. Olesen	2018	Soil carbon varies between different organic and conventional management schemes in arable agriculture	The effects of organic versus conventional farming systems on changes in soil organic carbon (SOC) has long been debated. The effects of such comparisons may depend considerably on the design of the respective systems and climate and soil conditions under which they are performed. Here, we compare a range of arable organic and conventional crop systems at three sites (Jyndevad, Foulum and Flakkeb…	European Journal of Agronomy	94		79-88		A. Shah, M. Askegaard, I. A. Rasmussen, E. M. Cordoba Jimenez, J. E. Olesen (2017) Productivity of organic and conventional arable cropping systems in long- term experiments in Denmark. European Journal of Agronomy 90: 12-22; J. E. Olesen, E. M. Hansen, M. Askegaard, I. A. Rasmussen (2007) The value of catch crops and organic manures for spring barley in organic arable farming. Field Crops Resear…	2020UPDTCCLA061a	SOC calculated from Table 4 and Section 2.1 Hu 2018, see Supplementary file		Yes	Yes	No	No	BACI	ELCI	Denmark	Jyndevad	54.901	9.152	Fully factorial		378	8	2 replicates of each phase of 4-course rotation, where each phase of rotation present every year, so 8 replicates overall	3		8		Orthic Haplohumod	4.5			1.572	6	NS		2	0	2	0	1	4	High	2005	2008
2020UPDTCCLA061	T. Hu; P. Sorensen; J. E. Olesen	2018	Soil carbon varies between different organic and conventional management schemes in arable agriculture	The effects of organic versus conventional farming systems on changes in soil organic carbon (SOC) has long been debated. The effects of such comparisons may depend considerably on the design of the respective systems and climate and soil conditions under which they are performed. Here, we compare a range of arable organic and conventional crop systems at three sites (Jyndevad, Foulum and Flakkeb…	European Journal of Agronomy	94		79-88		A. Shah, M. Askegaard, I. A. Rasmussen, E. M. Cordoba Jimenez, J. E. Olesen (2017) Productivity of organic and conventional arable cropping systems in long- term experiments in Denmark. European Journal of Agronomy 90: 12-22; J. E. Olesen, E. M. Hansen, M. Askegaard, I. A. Rasmussen (2007) The value of catch crops and organic manures for spring barley in organic arable farming. Field Crops Resear…	2020UPDTCCLA061a	SOC calculated from Table 4 and Section 2.1 Hu 2018, see Supplementary file		Yes	Yes	No	No	BACI	ELCI	Denmark	Jyndevad	54.901	9.152	Fully factorial		378	8	2 replicates of each phase of 4-course rotation, where each phase of rotation present every year, so 8 replicates overall	3		8		Orthic Haplohumod	4.5			1.572	6	NS		2	0	2	0	1	4	High	2005	2008
2020UPDTCCLA061	T. Hu; P. Sorensen; J. E. Olesen	2018	Soil carbon varies between different organic and conventional management schemes in arable agriculture	The effects of organic versus conventional farming systems on changes in soil organic carbon (SOC) has long been debated. The effects of such comparisons may depend considerably on the design of the respective systems and climate and soil conditions under which they are performed. Here, we compare a range of arable organic and conventional crop systems at three sites (Jyndevad, Foulum and Flakkeb…	European Journal of Agronomy	94		79-88		A. Shah, M. Askegaard, I. A. Rasmussen, E. M. Cordoba Jimenez, J. E. Olesen (2017) Productivity of organic and conventional arable cropping systems in long- term experiments in Denmark. European Journal of Agronomy 90: 12-22; J. E. Olesen, E. M. Hansen, M. Askegaard, I. A. Rasmussen (2007) The value of catch crops and organic manures for spring barley in organic arable farming. Field Crops Resear…	2020UPDTCCLA061a	SOC calculated from Table 4 and Section 2.1 Hu 2018, see Supplementary file		Yes	Yes	No	No	BACI	ELCI	Denmark	Jyndevad	54.901	9.152	Fully factorial		378	8	2 replicates of each phase of 4-course rotation, where each phase of rotation present every year, so 8 replicates overall	3		8		Orthic Haplohumod	4.5			1.572	6	NS		2	0	2	0	1	4	High	2005	2008
2020UPDTCCLA061	T. Hu; P. Sorensen; J. E. Olesen	2018	Soil carbon varies between different organic and conventional management schemes in arable agriculture	The effects of organic versus conventional farming systems on changes in soil organic carbon (SOC) has long been debated. The effects of such comparisons may depend considerably on the design of the respective systems and climate and soil conditions under which they are performed. Here, we compare a range of arable organic and conventional crop systems at three sites (Jyndevad, Foulum and Flakkeb…	European Journal of Agronomy	94		79-88		A. Shah, M. Askegaard, I. A. Rasmussen, E. M. Cordoba Jimenez, J. E. Olesen (2017) Productivity of organic and conventional arable cropping systems in long- term experiments in Denmark. European Journal of Agronomy 90: 12-22; J. E. Olesen, E. M. Hansen, M. Askegaard, I. A. Rasmussen (2007) The value of catch crops and organic manures for spring barley in organic arable farming. Field Crops Resear…	2020UPDTCCLA061a	SOC calculated from Table 4 and Section 2.1 Hu 2018, see Supplementary file		Yes	Yes	No	No	BACI	ELCI	Denmark	Jyndevad	54.901	9.152	Fully factorial		378	8	2 replicates of each phase of 4-course rotation, where each phase of rotation present every year, so 8 replicates overall	3		8		Orthic Haplohumod	4.5			1.572	6	NS		2	0	2	0	1	4	High	2005	2008
2020UPDTCCLA061	T. Hu; P. Sorensen; J. E. Olesen	2018	Soil carbon varies between different organic and conventional management schemes in arable agriculture	The effects of organic versus conventional farming systems on changes in soil organic carbon (SOC) has long been debated. The effects of such comparisons may depend considerably on the design of the respective systems and climate and soil conditions under which they are performed. Here, we compare a range of arable organic and conventional crop systems at three sites (Jyndevad, Foulum and Flakkeb…	European Journal of Agronomy	94		79-88		A. Shah, M. Askegaard, I. A. Rasmussen, E. M. Cordoba Jimenez, J. E. Olesen (2017) Productivity of organic and conventional arable cropping systems in long- term experiments in Denmark. European Journal of Agronomy 90: 12-22; J. E. Olesen, E. M. Hansen, M. Askegaard, I. A. Rasmussen (2007) The value of catch crops and organic manures for spring barley in organic arable farming. Field Crops Resear…	2020UPDTCCLA061c	SOC calculated from Table 4 and Section 2.1 Hu 2018, see Supplementary file		Yes	Yes	No	No	BACI	ELCI	Denmark	Flakkebjerg	55.318	11.388	Fully factorial		169	8	2 replicates of each phase of 4-course rotation, where each phase of rotation present every year, so 8 replicates overall	3		8		Typic Agrudalf	15.5			1.702	7.4	NS		2	0	2	0	1	4	High	1997	2004
2020UPDTCCLA061	T. Hu; P. Sorensen; J. E. Olesen	2018	Soil carbon varies between different organic and conventional management schemes in arable agriculture	The effects of organic versus conventional farming systems on changes in soil organic carbon (SOC) has long been debated. The effects of such comparisons may depend considerably on the design of the respective systems and climate and soil conditions under which they are performed. Here, we compare a range of arable organic and conventional crop systems at three sites (Jyndevad, Foulum and Flakkeb…	European Journal of Agronomy	94		79-88		A. Shah, M. Askegaard, I. A. Rasmussen, E. M. Cordoba Jimenez, J. E. Olesen (2017) Productivity of organic and conventional arable cropping systems in long- term experiments in Denmark. European Journal of Agronomy 90: 12-22; J. E. Olesen, E. M. Hansen, M. Askegaard, I. A. Rasmussen (2007) The value of catch crops and organic manures for spring barley in organic arable farming. Field Crops Resear…	2020UPDTCCLA061c	SOC calculated from Table 4 and Section 2.1 Hu 2018, see Supplementary file		Yes	Yes	No	No	BACI	ELCI	Denmark	Flakkebjerg	55.318	11.388	Fully factorial		169	8	2 replicates of each phase of 4-course rotation, where each phase of rotation present every year, so 8 replicates overall	3		8		Typic Agrudalf	15.5			1.702	7.4	NS		2	0	2	0	1	4	High	1997	2008
2020UPDTCCLA061	T. Hu; P. Sorensen; J. E. Olesen	2018	Soil carbon varies between different organic and conventional management schemes in arable agriculture	The effects of organic versus conventional farming systems on changes in soil organic carbon (SOC) has long been debated. The effects of such comparisons may depend considerably on the design of the respective systems and climate and soil conditions under which they are performed. Here, we compare a range of arable organic and conventional crop systems at three sites (Jyndevad, Foulum and Flakkeb…	European Journal of Agronomy	94		79-88		A. Shah, M. Askegaard, I. A. Rasmussen, E. M. Cordoba Jimenez, J. E. Olesen (2017) Productivity of organic and conventional arable cropping systems in long- term experiments in Denmark. European Journal of Agronomy 90: 12-22; J. E. Olesen, E. M. Hansen, M. Askegaard, I. A. Rasmussen (2007) The value of catch crops and organic manures for spring barley in organic arable farming. Field Crops Resear…	2020UPDTCCLA061c	SOC calculated from Table 4 and Section 2.1 Hu 2018, see Supplementary file		Yes	Yes	No	No	BACI	ELCI	Denmark	Flakkebjerg	55.318	11.388	Fully factorial		169	8	2 replicates of each phase of 4-course rotation, where each phase of rotation present every year, so 8 replicates overall	3		8		Typic Agrudalf	15.5			1.702	7.4	NS		2	0	2	0	1	4	High	1997	2008
2020UPDTCCLA061	T. Hu; P. Sorensen; J. E. Olesen	2018	Soil carbon varies between different organic and conventional management schemes in arable agriculture	The effects of organic versus conventional farming systems on changes in soil organic carbon (SOC) has long been debated. The effects of such comparisons may depend considerably on the design of the respective systems and climate and soil conditions under which they are performed. Here, we compare a range of arable organic and conventional crop systems at three sites (Jyndevad, Foulum and Flakkeb…	European Journal of Agronomy	94		79-88		A. Shah, M. Askegaard, I. A. Rasmussen, E. M. Cordoba Jimenez, J. E. Olesen (2017) Productivity of organic and conventional arable cropping systems in long- term experiments in Denmark. European Journal of Agronomy 90: 12-22; J. E. Olesen, E. M. Hansen, M. Askegaard, I. A. Rasmussen (2007) The value of catch crops and organic manures for spring barley in organic arable farming. Field Crops Resear…	2020UPDTCCLA061c	SOC calculated from Table 4 and Section 2.1 Hu 2018, see Supplementary file		Yes	Yes	No	No	BACI	ELCI	Denmark	Flakkebjerg	55.318	11.388	Fully factorial		169	8	2 replicates of each phase of 4-course rotation, where each phase of rotation present every year, so 8 replicates overall	3		8		Typic Agrudalf	15.5			1.702	7.4	NS		2	0	2	0	1	4	High	1997	2008
2020UPDTCCLA061	T. Hu; P. Sorensen; J. E. Olesen	2018	Soil carbon varies between different organic and conventional management schemes in arable agriculture	The effects of organic versus conventional farming systems on changes in soil organic carbon (SOC) has long been debated. The effects of such comparisons may depend considerably on the design of the respective systems and climate and soil conditions under which they are performed. Here, we compare a range of arable organic and conventional crop systems at three sites (Jyndevad, Foulum and Flakkeb…	European Journal of Agronomy	94		79-88		A. Shah, M. Askegaard, I. A. Rasmussen, E. M. Cordoba Jimenez, J. E. Olesen (2017) Productivity of organic and conventional arable cropping systems in long- term experiments in Denmark. European Journal of Agronomy 90: 12-22; J. E. Olesen, E. M. Hansen, M. Askegaard, I. A. Rasmussen (2007) The value of catch crops and organic manures for spring barley in organic arable farming. Field Crops Resear…	2020UPDTCCLA061c	SOC calculated from Table 4 and Section 2.1 Hu 2018, see Supplementary file		Yes	Yes	No	No	BACI	ELCI	Denmark	Flakkebjerg	55.318	11.388	Fully factorial		169	8	2 replicates of each phase of 4-course rotation, where each phase of rotation present every year, so 8 replicates overall	3		8		Typic Agrudalf	15.5			1.702	7.4	NS		2	0	2	0	1	4	High	1997	2004
2020UPDTCCLA061	T. Hu; P. Sorensen; J. E. Olesen	2018	Soil carbon varies between different organic and conventional management schemes in arable agriculture	The effects of organic versus conventional farming systems on changes in soil organic carbon (SOC) has long been debated. The effects of such comparisons may depend considerably on the design of the respective systems and climate and soil conditions under which they are performed. Here, we compare a range of arable organic and conventional crop systems at three sites (Jyndevad, Foulum and Flakkeb…	European Journal of Agronomy	94		79-88		A. Shah, M. Askegaard, I. A. Rasmussen, E. M. Cordoba Jimenez, J. E. Olesen (2017) Productivity of organic and conventional arable cropping systems in long- term experiments in Denmark. European Journal of Agronomy 90: 12-22; J. E. Olesen, E. M. Hansen, M. Askegaard, I. A. Rasmussen (2007) The value of catch crops and organic manures for spring barley in organic arable farming. Field Crops Resear…	2020UPDTCCLA061c	SOC calculated from Table 4 and Section 2.1 Hu 2018, see Supplementary file		Yes	Yes	No	No	BACI	ELCI	Denmark	Flakkebjerg	55.318	11.388	Fully factorial		169	8	2 replicates of each phase of 4-course rotation, where each phase of rotation present every year, so 8 replicates overall	3		8		Typic Agrudalf	15.5			1.702	7.4	NS		2	0	2	0	1	4	High	1997	2008
2020UPDTCCLA061	T. Hu; P. Sorensen; J. E. Olesen	2018	Soil carbon varies between different organic and conventional management schemes in arable agriculture	The effects of organic versus conventional farming systems on changes in soil organic carbon (SOC) has long been debated. The effects of such comparisons may depend considerably on the design of the respective systems and climate and soil conditions under which they are performed. Here, we compare a range of arable organic and conventional crop systems at three sites (Jyndevad, Foulum and Flakkeb…	European Journal of Agronomy	94		79-88		A. Shah, M. Askegaard, I. A. Rasmussen, E. M. Cordoba Jimenez, J. E. Olesen (2017) Productivity of organic and conventional arable cropping systems in long- term experiments in Denmark. European Journal of Agronomy 90: 12-22; J. E. Olesen, E. M. Hansen, M. Askegaard, I. A. Rasmussen (2007) The value of catch crops and organic manures for spring barley in organic arable farming. Field Crops Resear…	2020UPDTCCLA061c	SOC calculated from Table 4 and Section 2.1 Hu 2018, see Supplementary file		Yes	Yes	No	No	BACI	ELCI	Denmark	Flakkebjerg	55.318	11.388	Fully factorial		169	8	2 replicates of each phase of 4-course rotation, where each phase of rotation present every year, so 8 replicates overall	3		8		Typic Agrudalf	15.5			1.702	7.4	NS		2	0	2	0	1	4	High	1997	2008
2020UPDTCCLA061	T. Hu; P. Sorensen; J. E. Olesen	2018	Soil carbon varies between different organic and conventional management schemes in arable agriculture	The effects of organic versus conventional farming systems on changes in soil organic carbon (SOC) has long been debated. The effects of such comparisons may depend considerably on the design of the respective systems and climate and soil conditions under which they are performed. Here, we compare a range of arable organic and conventional crop systems at three sites (Jyndevad, Foulum and Flakkeb…	European Journal of Agronomy	94		79-88		A. Shah, M. Askegaard, I. A. Rasmussen, E. M. Cordoba Jimenez, J. E. Olesen (2017) Productivity of organic and conventional arable cropping systems in long- term experiments in Denmark. European Journal of Agronomy 90: 12-22; J. E. Olesen, E. M. Hansen, M. Askegaard, I. A. Rasmussen (2007) The value of catch crops and organic manures for spring barley in organic arable farming. Field Crops Resear…	2020UPDTCCLA061c	SOC calculated from Table 4 and Section 2.1 Hu 2018, see Supplementary file		Yes	Yes	No	No	BACI	ELCI	Denmark	Flakkebjerg	55.318	11.388	Fully factorial		169	8	2 replicates of each phase of 4-course rotation, where each phase of rotation present every year, so 8 replicates overall	3		8		Typic Agrudalf	15.5			1.702	7.4	NS		2	0	2	0	1	4	High	1997	2008
2020UPDTCCLA061	T. Hu; P. Sorensen; J. E. Olesen	2018	Soil carbon varies between different organic and conventional management schemes in arable agriculture	The effects of organic versus conventional farming systems on changes in soil organic carbon (SOC) has long been debated. The effects of such comparisons may depend considerably on the design of the respective systems and climate and soil conditions under which they are performed. Here, we compare a range of arable organic and conventional crop systems at three sites (Jyndevad, Foulum and Flakkeb…	European Journal of Agronomy	94		79-88		A. Shah, M. Askegaard, I. A. Rasmussen, E. M. Cordoba Jimenez, J. E. Olesen (2017) Productivity of organic and conventional arable cropping systems in long- term experiments in Denmark. European Journal of Agronomy 90: 12-22; J. E. Olesen, E. M. Hansen, M. Askegaard, I. A. Rasmussen (2007) The value of catch crops and organic manures for spring barley in organic arable farming. Field Crops Resear…	2020UPDTCCLA061c	SOC calculated from Table 4 and Section 2.1 Hu 2018, see Supplementary file		Yes	Yes	No	No	BACI	ELCI	Denmark	Flakkebjerg	55.318	11.388	Fully factorial		169	8	2 replicates of each phase of 4-course rotation, where each phase of rotation present every year, so 8 replicates overall	3		8		Typic Agrudalf	15.5			1.702	7.4	NS		2	0	2	0	1	4	High	2005	2008
2020UPDTCCLA061	T. Hu; P. Sorensen; J. E. Olesen	2018	Soil carbon varies between different organic and conventional management schemes in arable agriculture	The effects of organic versus conventional farming systems on changes in soil organic carbon (SOC) has long been debated. The effects of such comparisons may depend considerably on the design of the respective systems and climate and soil conditions under which they are performed. Here, we compare a range of arable organic and conventional crop systems at three sites (Jyndevad, Foulum and Flakkeb…	European Journal of Agronomy	94		79-88		A. Shah, M. Askegaard, I. A. Rasmussen, E. M. Cordoba Jimenez, J. E. Olesen (2017) Productivity of organic and conventional arable cropping systems in long- term experiments in Denmark. European Journal of Agronomy 90: 12-22; J. E. Olesen, E. M. Hansen, M. Askegaard, I. A. Rasmussen (2007) The value of catch crops and organic manures for spring barley in organic arable farming. Field Crops Resear…	2020UPDTCCLA061c	SOC calculated from Table 4 and Section 2.1 Hu 2018, see Supplementary file		Yes	Yes	No	No	BACI	ELCI	Denmark	Flakkebjerg	55.318	11.388	Fully factorial		169	8	2 replicates of each phase of 4-course rotation, where each phase of rotation present every year, so 8 replicates overall	3		8		Typic Agrudalf	15.5			1.702	7.4	NS		2	0	2	0	1	4	High	2005	2008
2020UPDTCCLA071	A. E. Johnston; J. McEwen; P. W. Lane; M. V. Hewitt; P. R. Poulton; D. P. Yeoman	1994	Effects of one to six year old ryegrass-clover leys on soil nitrogen and on the subsequent yields and fertilizer nitrogen requirements of the arable sequence winter wheat, potatoes, winter wheat, winter beans (Vicia faba) grown on a sandy loam soil	In a trial at Woburn, England established in 1980, the largest yields of wheat and potatoes came from the combination of longer Lolium perenne-Trifolium repens ley (at least 3 years) + optimum fertilizer N but yields of V. faba were decreased where N had been given to the previous crops. Without fertilizer N, 2-year-old leys significantly increased yields compared with 1-year leys and the effect …	Journal of Agricultural Science	122	1	73-89			2020UPDTCCLA071				Yes	Yes	Yes	CI	CI	England	Woburn	52.015	-0.596	Randomised split-plot	8x20	160	4		1	SOC measured once when leys terminated; yield measured for 4 years after termination	12	2 per subplot, 6 subplots per plots, so 12 samples per LA treatment	Sandy loam	13.5			1.65	6.4	H2O	Bulk density for 0-30cm depth. Clay value from Johnston et al. 2017 (2020UPDTCCLA072)	1	0	2	0	1	3	High	1980	1990
2020UPDTCCLA071	A. E. Johnston; J. McEwen; P. W. Lane; M. V. Hewitt; P. R. Poulton; D. P. Yeoman	1994	Effects of one to six year old ryegrass-clover leys on soil nitrogen and on the subsequent yields and fertilizer nitrogen requirements of the arable sequence winter wheat, potatoes, winter wheat, winter beans (Vicia faba) grown on a sandy loam soil	In a trial at Woburn, England established in 1980, the largest yields of wheat and potatoes came from the combination of longer Lolium perenne-Trifolium repens ley (at least 3 years) + optimum fertilizer N but yields of V. faba were decreased where N had been given to the previous crops. Without fertilizer N, 2-year-old leys significantly increased yields compared with 1-year leys and the effect …	Journal of Agricultural Science	122	1	73-89			2020UPDTCCLA071				Yes	Yes	Yes	CI	CI	England	Woburn	52.015	-0.596	Randomised split-plot	8x20	160	4		1	SOC measured once when leys terminated; yield measured for 4 years after termination	12	2 per subplot, 6 subplots per plots, so 12 samples per LA treatment	Sandy loam	13.5			1.65	6.4	H2O	Bulk density for 0-30cm depth. Clay value from Johnston et al. 2017 (2020UPDTCCLA072)	1	0	2	0	1	3	High	1980	1990
2020UPDTCCLA071	A. E. Johnston; J. McEwen; P. W. Lane; M. V. Hewitt; P. R. Poulton; D. P. Yeoman	1994	Effects of one to six year old ryegrass-clover leys on soil nitrogen and on the subsequent yields and fertilizer nitrogen requirements of the arable sequence winter wheat, potatoes, winter wheat, winter beans (Vicia faba) grown on a sandy loam soil	In a trial at Woburn, England established in 1980, the largest yields of wheat and potatoes came from the combination of longer Lolium perenne-Trifolium repens ley (at least 3 years) + optimum fertilizer N but yields of V. faba were decreased where N had been given to the previous crops. Without fertilizer N, 2-year-old leys significantly increased yields compared with 1-year leys and the effect …	Journal of Agricultural Science	122	1	73-89			2020UPDTCCLA071				Yes	Yes	Yes	CI	CI	England	Woburn	52.015	-0.596	Randomised split-plot	8x20	160	4		1	SOC measured once when leys terminated; yield measured for 4 years after termination	12	2 per subplot, 6 subplots per plots, so 12 samples per LA treatment	Sandy loam	13.5			1.65	6.4	H2O	Bulk density for 0-30cm depth. Clay value from Johnston et al. 2017 (2020UPDTCCLA072)	1	0	2	0	1	3	High	1980	1990
2020UPDTCCLA071	A. E. Johnston; J. McEwen; P. W. Lane; M. V. Hewitt; P. R. Poulton; D. P. Yeoman	1994	Effects of one to six year old ryegrass-clover leys on soil nitrogen and on the subsequent yields and fertilizer nitrogen requirements of the arable sequence winter wheat, potatoes, winter wheat, winter beans (Vicia faba) grown on a sandy loam soil	In a trial at Woburn, England established in 1980, the largest yields of wheat and potatoes came from the combination of longer Lolium perenne-Trifolium repens ley (at least 3 years) + optimum fertilizer N but yields of V. faba were decreased where N had been given to the previous crops. Without fertilizer N, 2-year-old leys significantly increased yields compared with 1-year leys and the effect …	Journal of Agricultural Science	122	1	73-89			2020UPDTCCLA071				Yes	Yes	Yes	CI	CI	England	Woburn	52.015	-0.596	Randomised split-plot	8x20	160	4		1	SOC measured once when leys terminated; yield measured for 4 years after termination	12	2 per subplot, 6 subplots per plots, so 12 samples per LA treatment	Sandy loam	13.5			1.65	6.4	H2O	Bulk density for 0-30cm depth. Clay value from Johnston et al. 2017 (2020UPDTCCLA072)	1	0	2	0	1	3	High	1980	1990
2020UPDTCCLA071	A. E. Johnston; J. McEwen; P. W. Lane; M. V. Hewitt; P. R. Poulton; D. P. Yeoman	1994	Effects of one to six year old ryegrass-clover leys on soil nitrogen and on the subsequent yields and fertilizer nitrogen requirements of the arable sequence winter wheat, potatoes, winter wheat, winter beans (Vicia faba) grown on a sandy loam soil	In a trial at Woburn, England established in 1980, the largest yields of wheat and potatoes came from the combination of longer Lolium perenne-Trifolium repens ley (at least 3 years) + optimum fertilizer N but yields of V. faba were decreased where N had been given to the previous crops. Without fertilizer N, 2-year-old leys significantly increased yields compared with 1-year leys and the effect …	Journal of Agricultural Science	122	1	73-89			2020UPDTCCLA071				Yes	Yes	Yes	CI	CI	England	Woburn	52.015	-0.596	Randomised split-plot	8x20	160	4		1	SOC measured once when leys terminated; yield measured for 4 years after termination	12	2 per subplot, 6 subplots per plots, so 12 samples per LA treatment	Sandy loam	13.5			1.65	6.4	H2O	Bulk density for 0-30cm depth. Clay value from Johnston et al. 2017 (2020UPDTCCLA072)	1	0	2	0	1	3	High	1980	1990
2020UPDTCCLA071	A. E. Johnston; J. McEwen; P. W. Lane; M. V. Hewitt; P. R. Poulton; D. P. Yeoman	1994	Effects of one to six year old ryegrass-clover leys on soil nitrogen and on the subsequent yields and fertilizer nitrogen requirements of the arable sequence winter wheat, potatoes, winter wheat, winter beans (Vicia faba) grown on a sandy loam soil	In a trial at Woburn, England established in 1980, the largest yields of wheat and potatoes came from the combination of longer Lolium perenne-Trifolium repens ley (at least 3 years) + optimum fertilizer N but yields of V. faba were decreased where N had been given to the previous crops. Without fertilizer N, 2-year-old leys significantly increased yields compared with 1-year leys and the effect …	Journal of Agricultural Science	122	1	73-89			2020UPDTCCLA071				Yes	Yes	Yes	CI	CI	England	Woburn	52.015	-0.596	Randomised split-plot	8x20	160	4		1	SOC measured once when leys terminated; yield measured for 4 years after termination	12	2 per subplot, 6 subplots per plots, so 12 samples per LA treatment	Sandy loam	13.5			1.65	6.4	H2O	Bulk density for 0-30cm depth. Clay value from Johnston et al. 2017 (2020UPDTCCLA072)	1	0	2	0	1	3	High	1980	1990
2020UPDTCCLA072	A. E. Johnston; P. R. Poulton; K. Coleman; A. J. Macdonald; R. P. White	2017	Changes in soil organic matter over 70 years in continuous arable and ley-arable rotations on a sandy loam soil in England	The sequestration in soil of organic carbon (SOC) derived from atmospheric carbon dioxide (CO<sub>2</sub>) by replacing arable crops with leys, has been measured over 70 years on a sandy loam soil. The experiment was designed initially to test the effect of leys on the yields of arable crops. A 3-year grazed grass with clover (grass + clover) ley in a 5-year rotation with arable crops increased p…	European Journal of Soil Science	68	3	305-316			2020UPDTCCLA072	Calculated bulk density from total soil mass in main text			Yes	Yes	No	BACI	ELCI	England	Woburn	52.015	-0.596	Blocked	8.5x19.7	167.45	5		12		16-25	cores per plot	Cambric Arenosol	13.5			1.508			Clay 11-16%, averaged to 13.5 here	2	2	2	2	2	4	High	1938	2007
2020UPDTCCLA072	A. E. Johnston; P. R. Poulton; K. Coleman; A. J. Macdonald; R. P. White	2017	Changes in soil organic matter over 70 years in continuous arable and ley-arable rotations on a sandy loam soil in England	The sequestration in soil of organic carbon (SOC) derived from atmospheric carbon dioxide (CO<sub>2</sub>) by replacing arable crops with leys, has been measured over 70 years on a sandy loam soil. The experiment was designed initially to test the effect of leys on the yields of arable crops. A 3-year grazed grass with clover (grass + clover) ley in a 5-year rotation with arable crops increased p…	European Journal of Soil Science	68	3	305-316			2020UPDTCCLA072	Calculated bulk density from total soil mass in main text			Yes	Yes	No	BACI	ELCI	England	Woburn	52.015	-0.596	Blocked	8.5x19.7	167.45	5		12		16-25	cores per plot	Cambric Arenosol	13.5			1.508			Clay 11-16%, averaged to 13.5 here	2	2	2	2	2	4	High	1938	2007
2020UPDTCCLA072	A. E. Johnston; P. R. Poulton; K. Coleman; A. J. Macdonald; R. P. White	2017	Changes in soil organic matter over 70 years in continuous arable and ley-arable rotations on a sandy loam soil in England	The sequestration in soil of organic carbon (SOC) derived from atmospheric carbon dioxide (CO<sub>2</sub>) by replacing arable crops with leys, has been measured over 70 years on a sandy loam soil. The experiment was designed initially to test the effect of leys on the yields of arable crops. A 3-year grazed grass with clover (grass + clover) ley in a 5-year rotation with arable crops increased p…	European Journal of Soil Science	68	3	305-316			2020UPDTCCLA072	Calculated bulk density from total soil mass in main text			Yes	Yes	No	BACI	ELCI	England	Woburn	52.015	-0.596	Blocked	8.5x19.7	167.45	5		12		16-25	cores per plot	Cambric Arenosol	13.5			1.388			Clay 11-16%, averaged to 13.5 here	2	2	2	2	2	4	High	1938	2007
2020UPDTCCLA072	A. E. Johnston; P. R. Poulton; K. Coleman; A. J. Macdonald; R. P. White	2017	Changes in soil organic matter over 70 years in continuous arable and ley-arable rotations on a sandy loam soil in England	The sequestration in soil of organic carbon (SOC) derived from atmospheric carbon dioxide (CO<sub>2</sub>) by replacing arable crops with leys, has been measured over 70 years on a sandy loam soil. The experiment was designed initially to test the effect of leys on the yields of arable crops. A 3-year grazed grass with clover (grass + clover) ley in a 5-year rotation with arable crops increased p…	European Journal of Soil Science	68	3	305-316			2020UPDTCCLA072	Calculated bulk density from total soil mass in main text			Yes	Yes	No	BACI	ELCI	England	Woburn	52.015	-0.596	Blocked	8.5x19.7	167.45	5		12		16-25	cores per plot	Cambric Arenosol	13.5			1.388			Clay 11-16%, averaged to 13.5 here	2	2	2	2	2	4	High	1938	2007
2020UPDTCCLA074	T. Kautz; C. Stumm; R. Kosters; U. Koepke	2010	Effects of perennial fodder crops on soil structure in agricultural headlands	In agricultural headlands, rooting and yield of crops may be limited because of soil-structure changes as a consequence of multiple passes Of turning machinery We hypothesized that perennial forage crops can substantially alter soil structure in agricultural headlands. On one experimental field and two commercial farms on Haplic Luvisols from respectively loess and sandy loess in the Lower Rhine …	Journal of Plant Nutrition and Soil Science	173	4	490-501			2020UPDTCCLA074a				Yes	Yes	Yes	CI	CI	Germany	Klein-Altendorf	50.619	6.994	Randomised block	15x15m		4		1		4		Haplic Luvisol from loess (loamy silt)	17.6	75.5	7	1.19	6.4	CaCl2	Soil properties for 0-31 cm	1	0	2	-1	1	3	High	2004	2008
2020UPDTCCLA074	T. Kautz; C. Stumm; R. Kosters; U. Koepke	2010	Effects of perennial fodder crops on soil structure in agricultural headlands	In agricultural headlands, rooting and yield of crops may be limited because of soil-structure changes as a consequence of multiple passes Of turning machinery We hypothesized that perennial forage crops can substantially alter soil structure in agricultural headlands. On one experimental field and two commercial farms on Haplic Luvisols from respectively loess and sandy loess in the Lower Rhine …	Journal of Plant Nutrition and Soil Science	173	4	490-501			2020UPDTCCLA074a				Yes	Yes	Yes	CI	CI	Germany	Klein-Altendorf	50.619	6.994	Randomised block	15x15m		4		1		4		Haplic Luvisol from loess (loamy silt)	17.6	75.5	7	1.19	6.4	CaCl2	Soil properties for 0-31 cm	1	0	2	-1	1	3	High	2004	2008
2020UPDTCCLA074	T. Kautz; C. Stumm; R. Kosters; U. Koepke	2010	Effects of perennial fodder crops on soil structure in agricultural headlands	In agricultural headlands, rooting and yield of crops may be limited because of soil-structure changes as a consequence of multiple passes Of turning machinery We hypothesized that perennial forage crops can substantially alter soil structure in agricultural headlands. On one experimental field and two commercial farms on Haplic Luvisols from respectively loess and sandy loess in the Lower Rhine …	Journal of Plant Nutrition and Soil Science	173	4	490-501			2020UPDTCCLA074a				Yes	Yes	Yes	CI	CI	Germany	Klein-Altendorf	50.619	6.994	Randomised block	15x15m		4		1		4		Haplic Luvisol from loess (loamy silt)	17.6	75.5	7	1.19	6.4	CaCl2	Soil properties for 0-31 cm	1	0	2	-1	1	3	High	2004	2008
2020UPDTCCLA074	T. Kautz; C. Stumm; R. Kosters; U. Koepke	2010	Effects of perennial fodder crops on soil structure in agricultural headlands	In agricultural headlands, rooting and yield of crops may be limited because of soil-structure changes as a consequence of multiple passes Of turning machinery We hypothesized that perennial forage crops can substantially alter soil structure in agricultural headlands. On one experimental field and two commercial farms on Haplic Luvisols from respectively loess and sandy loess in the Lower Rhine …	Journal of Plant Nutrition and Soil Science	173	4	490-501			2020UPDTCCLA074b				Yes	Yes	Yes	CI	CI	Germany	Kaarst	51.191	6.611	Randomised block	15x15m		3		1		4		Haplic Luvisol from sandy loess (sandy loam)	21						Clay 17-25%, averaged to 21 here	1	0	2	-1	1	3	High	2004	2008
2020UPDTCCLA074	T. Kautz; C. Stumm; R. Kosters; U. Koepke	2010	Effects of perennial fodder crops on soil structure in agricultural headlands	In agricultural headlands, rooting and yield of crops may be limited because of soil-structure changes as a consequence of multiple passes Of turning machinery We hypothesized that perennial forage crops can substantially alter soil structure in agricultural headlands. On one experimental field and two commercial farms on Haplic Luvisols from respectively loess and sandy loess in the Lower Rhine …	Journal of Plant Nutrition and Soil Science	173	4	490-501			2020UPDTCCLA074b				Yes	Yes	Yes	CI	CI	Germany	Kaarst	51.191	6.611	Randomised block	15x15m		3		1		4		Haplic Luvisol from sandy loess (sandy loam)	21						Clay 17-25%, averaged to 21 here	1	0	2	-1	1	3	High	2004	2008
2020UPDTCCLA074	T. Kautz; C. Stumm; R. Kosters; U. Koepke	2010	Effects of perennial fodder crops on soil structure in agricultural headlands	In agricultural headlands, rooting and yield of crops may be limited because of soil-structure changes as a consequence of multiple passes Of turning machinery We hypothesized that perennial forage crops can substantially alter soil structure in agricultural headlands. On one experimental field and two commercial farms on Haplic Luvisols from respectively loess and sandy loess in the Lower Rhine …	Journal of Plant Nutrition and Soil Science	173	4	490-501			2020UPDTCCLA074b				Yes	Yes	Yes	CI	CI	Germany	Kaarst	51.191	6.611	Randomised block	15x15m		3		1		4		Haplic Luvisol from sandy loess (sandy loam)	21						Clay 17-25%, averaged to 21 here	1	0	2	-1	1	3	High	2004	2008
2020UPDTCCLA074	T. Kautz; C. Stumm; R. Kosters; U. Koepke	2010	Effects of perennial fodder crops on soil structure in agricultural headlands	In agricultural headlands, rooting and yield of crops may be limited because of soil-structure changes as a consequence of multiple passes Of turning machinery We hypothesized that perennial forage crops can substantially alter soil structure in agricultural headlands. On one experimental field and two commercial farms on Haplic Luvisols from respectively loess and sandy loess in the Lower Rhine …	Journal of Plant Nutrition and Soil Science	173	4	490-501			2020UPDTCCLA074c				Yes	Yes	Yes	CI	CI	Germany	Willich	51.283	6.474	Randomised block	15x15m		3		1		4		Haplic Luvisol from sandy loess (sandy loam)	21						Clay 17-25%, averaged to 21 here	1	0	2	-1	1	3	High	2004	2008
2020UPDTCCLA074	T. Kautz; C. Stumm; R. Kosters; U. Koepke	2010	Effects of perennial fodder crops on soil structure in agricultural headlands	In agricultural headlands, rooting and yield of crops may be limited because of soil-structure changes as a consequence of multiple passes Of turning machinery We hypothesized that perennial forage crops can substantially alter soil structure in agricultural headlands. On one experimental field and two commercial farms on Haplic Luvisols from respectively loess and sandy loess in the Lower Rhine …	Journal of Plant Nutrition and Soil Science	173	4	490-501			2020UPDTCCLA074c				Yes	Yes	Yes	CI	CI	Germany	Willich	51.283	6.474	Randomised block	15x15m		3		1		4		Haplic Luvisol from sandy loess (sandy loam)	21						Clay 17-25%, averaged to 21 here	1	0	2	-1	1	3	High	2004	2008
2020UPDTCCLA074	T. Kautz; C. Stumm; R. Kosters; U. Koepke	2010	Effects of perennial fodder crops on soil structure in agricultural headlands	In agricultural headlands, rooting and yield of crops may be limited because of soil-structure changes as a consequence of multiple passes Of turning machinery We hypothesized that perennial forage crops can substantially alter soil structure in agricultural headlands. On one experimental field and two commercial farms on Haplic Luvisols from respectively loess and sandy loess in the Lower Rhine …	Journal of Plant Nutrition and Soil Science	173	4	490-501			2020UPDTCCLA074c				Yes	Yes	Yes	CI	CI	Germany	Willich	51.283	6.474	Randomised block	15x15m		3		1		4		Haplic Luvisol from sandy loess (sandy loam)	21						Clay 17-25%, averaged to 21 here	1	0	2	-1	1	3	High	2004	2008
2020UPDTCCLA081	S. Landschoot; K. Dewitte; B. Marynissen; V. Derycke; J. Latre; G. Haesaert	2019	Does shifting from conventional to zero tillage in combination with a cover crop offers opportunities for silage maize cultivation in Flanders?	Tillage is an important agricultural practice, influencing the physical, chemical and biological soil characteristics. In this paper the influence of various tillage systems combined with or without a cover crop under different nitrogen fertilization levels on silage maize yield and soil fertility was investigated. Based on a field trial in Bottelare (Belgium), during the period 2007-2015, it was…	Journal of Plant Nutrition and Soil Science	182	6	980-989			2020UPDTCCLA081	SOC endline and yield baseline+endline extracted from figures	Yes	Yes		No	Yes	BACI	ELCI	Belgium	Bottelare	50.96	3.75	Split plot			3		9	i.e. every year	12	"at least"						6.4	NS		1	2	2	-1	2	3	High	2007	2015
2020UPDTCCLA081	S. Landschoot; K. Dewitte; B. Marynissen; V. Derycke; J. Latre; G. Haesaert	2019	Does shifting from conventional to zero tillage in combination with a cover crop offers opportunities for silage maize cultivation in Flanders?	Tillage is an important agricultural practice, influencing the physical, chemical and biological soil characteristics. In this paper the influence of various tillage systems combined with or without a cover crop under different nitrogen fertilization levels on silage maize yield and soil fertility was investigated. Based on a field trial in Bottelare (Belgium), during the period 2007-2015, it was…	Journal of Plant Nutrition and Soil Science	182	6	980-989			2020UPDTCCLA081	SOC endline and yield baseline+endline extracted from figures	Yes	Yes		No	Yes	BACI	ELCI	Belgium	Bottelare	50.96	3.75	Split plot			3		9	i.e. every year	12	"at least"						6.4	NS		1	2	2	-1	2	3	High	2007	2015
2020UPDTCCLA081	S. Landschoot; K. Dewitte; B. Marynissen; V. Derycke; J. Latre; G. Haesaert	2019	Does shifting from conventional to zero tillage in combination with a cover crop offers opportunities for silage maize cultivation in Flanders?	Tillage is an important agricultural practice, influencing the physical, chemical and biological soil characteristics. In this paper the influence of various tillage systems combined with or without a cover crop under different nitrogen fertilization levels on silage maize yield and soil fertility was investigated. Based on a field trial in Bottelare (Belgium), during the period 2007-2015, it was…	Journal of Plant Nutrition and Soil Science	182	6	980-989			2020UPDTCCLA081	SOC endline and yield baseline+endline extracted from figures	Yes	Yes		No	Yes	BACI	ELCI	Belgium	Bottelare	50.96	3.75	Split plot			3		9	i.e. every year	12	"at least"						6.4	NS		1	2	2	-1	2	3	High	2007	2015
2020UPDTCCLA081	S. Landschoot; K. Dewitte; B. Marynissen; V. Derycke; J. Latre; G. Haesaert	2019	Does shifting from conventional to zero tillage in combination with a cover crop offers opportunities for silage maize cultivation in Flanders?	Tillage is an important agricultural practice, influencing the physical, chemical and biological soil characteristics. In this paper the influence of various tillage systems combined with or without a cover crop under different nitrogen fertilization levels on silage maize yield and soil fertility was investigated. Based on a field trial in Bottelare (Belgium), during the period 2007-2015, it was…	Journal of Plant Nutrition and Soil Science	182	6	980-989			2020UPDTCCLA081	SOC endline and yield baseline+endline extracted from figures	Yes	Yes		No	Yes	BACI	ELCI	Belgium	Bottelare	50.96	3.75	Split plot			3		9	i.e. every year	12	"at least"						6.4	NS		1	2	2	-1	2	3	High	2007	2015
2020UPDTCCLA081	S. Landschoot; K. Dewitte; B. Marynissen; V. Derycke; J. Latre; G. Haesaert	2019	Does shifting from conventional to zero tillage in combination with a cover crop offers opportunities for silage maize cultivation in Flanders?	Tillage is an important agricultural practice, influencing the physical, chemical and biological soil characteristics. In this paper the influence of various tillage systems combined with or without a cover crop under different nitrogen fertilization levels on silage maize yield and soil fertility was investigated. Based on a field trial in Bottelare (Belgium), during the period 2007-2015, it was…	Journal of Plant Nutrition and Soil Science	182	6	980-989			2020UPDTCCLA081	SOC endline and yield baseline+endline extracted from figures	Yes	Yes		No	Yes	BACI	ELCI	Belgium	Bottelare	50.96	3.75	Split plot			3		9	i.e. every year	12	"at least"						6.4	NS		1	2	2	-1	2	3	High	2007	2015
2020UPDTCCLA081	S. Landschoot; K. Dewitte; B. Marynissen; V. Derycke; J. Latre; G. Haesaert	2019	Does shifting from conventional to zero tillage in combination with a cover crop offers opportunities for silage maize cultivation in Flanders?	Tillage is an important agricultural practice, influencing the physical, chemical and biological soil characteristics. In this paper the influence of various tillage systems combined with or without a cover crop under different nitrogen fertilization levels on silage maize yield and soil fertility was investigated. Based on a field trial in Bottelare (Belgium), during the period 2007-2015, it was…	Journal of Plant Nutrition and Soil Science	182	6	980-989			2020UPDTCCLA081	SOC endline and yield baseline+endline extracted from figures	Yes	Yes		No	Yes	BACI	ELCI	Belgium	Bottelare	50.96	3.75	Split plot			3		9	i.e. every year	12	"at least"						6.4	NS		1	2	2	-1	2	3	High	2007	2015
2020UPDTCCLA114	D. Plaza-Bonilla; J.-M. Nolot; S. Passot; D. Raffaillac; E. Justes	2016	Grain legume-based rotations managed under conventional tillage need cover crops to mitigate soil organic matter losses	Inserting legumes in low-input innovative cropping systems can represent a good strategy to reduce current N fertilizer dependency while enhancing ecosystem services. However, although the impact of the use of legumes as cover crops has been broadly studied, very little is known about the effects of grain legume-based rotations on soil organic carbon (SOC) and nitrogen (SON). A cropping system ex…	Soil & Tillage Research	156		33-43			2020UPDTCCLA114	SOC data extracted from figure		Yes		Yes	Yes	BACI	ELCI	France	Institut National de la Recherche Agronomique (INRA)	43.527	1.501	Split plot	200x15	3000	3		3	2003, 2006, 2009	10	2 areas sampled per subplot, not clear whether 5 or 10 samples taken from each of the 2 areas		25.6	36.8	25.6	1.55	7	H2O	Measured 30-60cm layer as well, but found no effect of treatment so only present 0-30 results	1	0	2	-1	2	3	High	2003	2009
2020UPDTCCLA114	D. Plaza-Bonilla; J.-M. Nolot; S. Passot; D. Raffaillac; E. Justes	2016	Grain legume-based rotations managed under conventional tillage need cover crops to mitigate soil organic matter losses	Inserting legumes in low-input innovative cropping systems can represent a good strategy to reduce current N fertilizer dependency while enhancing ecosystem services. However, although the impact of the use of legumes as cover crops has been broadly studied, very little is known about the effects of grain legume-based rotations on soil organic carbon (SOC) and nitrogen (SON). A cropping system ex…	Soil & Tillage Research	156		33-43			2020UPDTCCLA114	SOC data extracted from figure		Yes		Yes	Yes	BACI	ELCI	France	Institut National de la Recherche Agronomique (INRA)	43.527	1.501	Split plot	200x15	3000	3		3	2003, 2006, 2009	10	2 areas sampled per subplot, not clear whether 5 or 10 samples taken from each of the 2 areas		25.6	36.8	25.6	1.55	7	H2O	Measured 30-60cm layer as well, but found no effect of treatment so only present 0-30 results	1	0	2	-1	2	3	High	2003	2009
2020UPDTCCLA114	D. Plaza-Bonilla; J.-M. Nolot; S. Passot; D. Raffaillac; E. Justes	2016	Grain legume-based rotations managed under conventional tillage need cover crops to mitigate soil organic matter losses	Inserting legumes in low-input innovative cropping systems can represent a good strategy to reduce current N fertilizer dependency while enhancing ecosystem services. However, although the impact of the use of legumes as cover crops has been broadly studied, very little is known about the effects of grain legume-based rotations on soil organic carbon (SOC) and nitrogen (SON). A cropping system ex…	Soil & Tillage Research	156		33-43			2020UPDTCCLA114	SOC data extracted from figure		Yes		Yes	Yes	BACI	ELCI	France	Institut National de la Recherche Agronomique (INRA)	43.527	1.501	Split plot	200x15	3000	3		3	2003, 2006, 2009	10	2 areas sampled per subplot, not clear whether 5 or 10 samples taken from each of the 2 areas		25.6	36.8	25.6	1.55	7	H2O	Measured 30-60cm layer as well, but found no effect of treatment so only present 0-30 results	1	0	2	-1	2	3	High	2003	2009
2020UPDTCCLA114	D. Plaza-Bonilla; J.-M. Nolot; S. Passot; D. Raffaillac; E. Justes	2016	Grain legume-based rotations managed under conventional tillage need cover crops to mitigate soil organic matter losses	Inserting legumes in low-input innovative cropping systems can represent a good strategy to reduce current N fertilizer dependency while enhancing ecosystem services. However, although the impact of the use of legumes as cover crops has been broadly studied, very little is known about the effects of grain legume-based rotations on soil organic carbon (SOC) and nitrogen (SON). A cropping system ex…	Soil & Tillage Research	156		33-43			2020UPDTCCLA114	SOC data extracted from figure		Yes		Yes	Yes	BACI	ELCI	France	Institut National de la Recherche Agronomique (INRA)	43.527	1.501	Split plot	200x15	3000	3		3	2003, 2006, 2009	10	2 areas sampled per subplot, not clear whether 5 or 10 samples taken from each of the 2 areas		25.6	36.8	25.6	1.55	7	H2O	Measured 30-60cm layer as well, but found no effect of treatment so only present 0-30 results	1	0	2	-1	2	3	High	2003	2009
2020UPDTCCLA114	D. Plaza-Bonilla; J.-M. Nolot; S. Passot; D. Raffaillac; E. Justes	2016	Grain legume-based rotations managed under conventional tillage need cover crops to mitigate soil organic matter losses	Inserting legumes in low-input innovative cropping systems can represent a good strategy to reduce current N fertilizer dependency while enhancing ecosystem services. However, although the impact of the use of legumes as cover crops has been broadly studied, very little is known about the effects of grain legume-based rotations on soil organic carbon (SOC) and nitrogen (SON). A cropping system ex…	Soil & Tillage Research	156		33-43			2020UPDTCCLA114	SOC data extracted from figure		Yes		Yes	Yes	BACI	ELCI	France	Institut National de la Recherche Agronomique (INRA)	43.527	1.501	Split plot	200x15	3000	3		3	2003, 2006, 2009	10	2 areas sampled per subplot, not clear whether 5 or 10 samples taken from each of the 2 areas		25.6	36.8	25.6	1.55	7	H2O	Measured 30-60cm layer as well, but found no effect of treatment so only present 0-30 results	1	0	2	-1	2	3	High	2003	2009
2020UPDTCCLA114	D. Plaza-Bonilla; J.-M. Nolot; S. Passot; D. Raffaillac; E. Justes	2016	Grain legume-based rotations managed under conventional tillage need cover crops to mitigate soil organic matter losses	Inserting legumes in low-input innovative cropping systems can represent a good strategy to reduce current N fertilizer dependency while enhancing ecosystem services. However, although the impact of the use of legumes as cover crops has been broadly studied, very little is known about the effects of grain legume-based rotations on soil organic carbon (SOC) and nitrogen (SON). A cropping system ex…	Soil & Tillage Research	156		33-43			2020UPDTCCLA114	SOC data extracted from figure		Yes		Yes	Yes	BACI	ELCI	France	Institut National de la Recherche Agronomique (INRA)	43.527	1.501	Split plot	200x15	3000	3		3	2003, 2006, 2009	10	2 areas sampled per subplot, not clear whether 5 or 10 samples taken from each of the 2 areas		25.6	36.8	25.6	1.55	7	H2O	Measured 30-60cm layer as well, but found no effect of treatment so only present 0-30 results	1	0	2	-1	2	3	High	2003	2009
2020UPDTCCLA116	J. Rasmussen; J. Eriksen; E. M. Hansen; B. T. Christensen	2008	Carbon sequestration and residual effect of differently aged grass leys	In this study, the C sequestration and residual N effect of grass leys without legumes and grazing animals were investigated to understand the basic processes under grasslands. The experiment area was located at Askov Experimental Station in Jutland, Denmark. The soil is a light sandy loam classified as an Alfisol (Typic Hapludalf). In spring 1996, the first plots were established with a grass mi…	DJF Rapport, Markbrug	137		40-43		B. T. Christensen, J. Rasmussen, J. Eriksen, E. M. Hansen (2009) Soil carbon storage and yields of spring barley following grass leys of different age. European Journal of Agronomy 31: 29-35	2020UPDTCCLA116	SOC & yield data extracted from figures			Yes	Yes	No	BACI	CI	Denmark	Askov Experimental Station	55.471	9.111	Randomised split plot	6x54	324	3		3	Immediately before sown to grass (1996-2001), before ploughed (2002) and after last crop (2004)	20	per plot	Typic Hapludalf	10	11	79	1.55			Bulk density assumed not measured	1	0	2	-1	1	3	High	1996	2004
2020UPDTCCLA116	J. Rasmussen; J. Eriksen; E. M. Hansen; B. T. Christensen	2008	Carbon sequestration and residual effect of differently aged grass leys	In this study, the C sequestration and residual N effect of grass leys without legumes and grazing animals were investigated to understand the basic processes under grasslands. The experiment area was located at Askov Experimental Station in Jutland, Denmark. The soil is a light sandy loam classified as an Alfisol (Typic Hapludalf). In spring 1996, the first plots were established with a grass mi…	DJF Rapport, Markbrug	137		40-43		B. T. Christensen, J. Rasmussen, J. Eriksen, E. M. Hansen (2009) Soil carbon storage and yields of spring barley following grass leys of different age. European Journal of Agronomy 31: 29-35	2020UPDTCCLA116	SOC & yield data extracted from figures			Yes	Yes	No	BACI	CI	Denmark	Askov Experimental Station	55.471	9.111	Randomised split plot	6x54	324	3		3	Immediately before sown to grass (1996-2001), before ploughed (2002) and after last crop (2004)	20	per plot	Typic Hapludalf	10	11	79	1.55			Bulk density assumed not measured	1	0	2	-1	1	3	High	1997	2004
2020UPDTCCLA116	J. Rasmussen; J. Eriksen; E. M. Hansen; B. T. Christensen	2008	Carbon sequestration and residual effect of differently aged grass leys	In this study, the C sequestration and residual N effect of grass leys without legumes and grazing animals were investigated to understand the basic processes under grasslands. The experiment area was located at Askov Experimental Station in Jutland, Denmark. The soil is a light sandy loam classified as an Alfisol (Typic Hapludalf). In spring 1996, the first plots were established with a grass mi…	DJF Rapport, Markbrug	137		40-43		B. T. Christensen, J. Rasmussen, J. Eriksen, E. M. Hansen (2009) Soil carbon storage and yields of spring barley following grass leys of different age. European Journal of Agronomy 31: 29-35	2020UPDTCCLA116	SOC & yield data extracted from figures			Yes	Yes	No	BACI	CI	Denmark	Askov Experimental Station	55.471	9.111	Randomised split plot	6x54	324	3		3	Immediately before sown to grass (1996-2001), before ploughed (2002) and after last crop (2004)	20	per plot	Typic Hapludalf	10	11	79	1.55			Bulk density assumed not measured	1	0	2	-1	1	3	High	1998	2004
2020UPDTCCLA116	J. Rasmussen; J. Eriksen; E. M. Hansen; B. T. Christensen	2008	Carbon sequestration and residual effect of differently aged grass leys	In this study, the C sequestration and residual N effect of grass leys without legumes and grazing animals were investigated to understand the basic processes under grasslands. The experiment area was located at Askov Experimental Station in Jutland, Denmark. The soil is a light sandy loam classified as an Alfisol (Typic Hapludalf). In spring 1996, the first plots were established with a grass mi…	DJF Rapport, Markbrug	137		40-43		B. T. Christensen, J. Rasmussen, J. Eriksen, E. M. Hansen (2009) Soil carbon storage and yields of spring barley following grass leys of different age. European Journal of Agronomy 31: 29-35	2020UPDTCCLA116	SOC & yield data extracted from figures			Yes	Yes	No	BACI	CI	Denmark	Askov Experimental Station	55.471	9.111	Randomised split plot	6x54	324	3		3	Immediately before sown to grass (1996-2001), before ploughed (2002) and after last crop (2004)	20	per plot	Typic Hapludalf	10	11	79	1.55			Bulk density assumed not measured	1	0	2	-1	1	3	High	1999	2004
2020UPDTCCLA116	J. Rasmussen; J. Eriksen; E. M. Hansen; B. T. Christensen	2008	Carbon sequestration and residual effect of differently aged grass leys	In this study, the C sequestration and residual N effect of grass leys without legumes and grazing animals were investigated to understand the basic processes under grasslands. The experiment area was located at Askov Experimental Station in Jutland, Denmark. The soil is a light sandy loam classified as an Alfisol (Typic Hapludalf). In spring 1996, the first plots were established with a grass mi…	DJF Rapport, Markbrug	137		40-43		B. T. Christensen, J. Rasmussen, J. Eriksen, E. M. Hansen (2009) Soil carbon storage and yields of spring barley following grass leys of different age. European Journal of Agronomy 31: 29-35	2020UPDTCCLA116	SOC & yield data extracted from figures			Yes	Yes	No	BACI	CI	Denmark	Askov Experimental Station	55.471	9.111	Randomised split plot	6x54	324	3		3	Immediately before sown to grass (1996-2001), before ploughed (2002) and after last crop (2004)	20	per plot	Typic Hapludalf	10	11	79	1.55			Bulk density assumed not measured	1	0	2	-1	1	3	High	2000	2004
2020UPDTCCLA116	J. Rasmussen; J. Eriksen; E. M. Hansen; B. T. Christensen	2008	Carbon sequestration and residual effect of differently aged grass leys	In this study, the C sequestration and residual N effect of grass leys without legumes and grazing animals were investigated to understand the basic processes under grasslands. The experiment area was located at Askov Experimental Station in Jutland, Denmark. The soil is a light sandy loam classified as an Alfisol (Typic Hapludalf). In spring 1996, the first plots were established with a grass mi…	DJF Rapport, Markbrug	137		40-43		B. T. Christensen, J. Rasmussen, J. Eriksen, E. M. Hansen (2009) Soil carbon storage and yields of spring barley following grass leys of different age. European Journal of Agronomy 31: 29-35	2020UPDTCCLA116	SOC & yield data extracted from figures			Yes	Yes	No	BACI	CI	Denmark	Askov Experimental Station	55.471	9.111	Randomised split plot	6x54	324	3		3	Immediately before sown to grass (1996-2001), before ploughed (2002) and after last crop (2004)	20	per plot	Typic Hapludalf	10	11	79	1.55			Bulk density assumed not measured	1	0	2	-1	1	3	High	2001	2004
2020UPDTCCLA136	F. Schulz; A. Gattinger; C. Brock; G. Leithold	2017	Organic farming with livestock raising vs. stockless farming - development of soil organic matter stocks and cash crop yields	An organic long-term field experiment with two factors has been carried out since 1998 at the experimental station Gladbacherhof, University of Giebetaen, Germany. The effects of different farm types (with and without livestock raising) combined with tillage treatments on plants, soil and environment have been investigated. This article presents results on soil fertility and cash crop yields acco…	Scientific Track “Innovative Research for Organic Agriculture 3.0” 19th Organic World Congress, New Delhi, India, November 9-11, 2017 Organized by ISOFAR, NCOF and TIPI	1		344-347	2020UPDTCCLA134, 2020UPDTCCLA135, BROCK11V174.3 (2020UPDTCCLA164b)	F. Schulz, C. Brock, G. Leithold (2008) Effects of Farm Type and Different Intensities of Soil Tillage on Cash Crop Yields and Soil Organic Matter. 16th IFOAM Organic World Congress, Modena, Italy, June 16-20, 2008. F. Schulz, C. Brock, H. Schmidt, K-P Franza, G. Leithold (2014) Development of soil organic matter stocks under different farm types and tillage systems in the Organic Arable Farming …	2020UPDTCCLA136	SOC data extracted from figure. Yield baseline data extracted from figure and endline calculated from info in Table 2 Schulz 2017		Yes	Yes	Yes	No	ELCI	ELCI	Germany	Gladbacherhof	50.393	8.193	Split plot	14x36	504	4		14	Every year 1998-2009, plus 2012, 2015	NS		Haplic luvisol	28.5	68	3.5	1.41	7	CaCl2	Bulk density average from 2009. pH range from 6.5-7.5.	1	1	2	0	1	3	High	1998	2015
2020UPDTCCLA136	F. Schulz; A. Gattinger; C. Brock; G. Leithold	2017	Organic farming with livestock raising vs. stockless farming - development of soil organic matter stocks and cash crop yields	An organic long-term field experiment with two factors has been carried out since 1998 at the experimental station Gladbacherhof, University of Giebetaen, Germany. The effects of different farm types (with and without livestock raising) combined with tillage treatments on plants, soil and environment have been investigated. This article presents results on soil fertility and cash crop yields acco…	Scientific Track “Innovative Research for Organic Agriculture 3.0” 19th Organic World Congress, New Delhi, India, November 9-11, 2017 Organized by ISOFAR, NCOF and TIPI	1		344-347	2020UPDTCCLA134, 2020UPDTCCLA135, BROCK11V174.3 (2020UPDTCCLA164b)	F. Schulz, C. Brock, G. Leithold (2008) Effects of Farm Type and Different Intensities of Soil Tillage on Cash Crop Yields and Soil Organic Matter. 16th IFOAM Organic World Congress, Modena, Italy, June 16-20, 2008. F. Schulz, C. Brock, H. Schmidt, K-P Franza, G. Leithold (2014) Development of soil organic matter stocks under different farm types and tillage systems in the Organic Arable Farming …	2020UPDTCCLA136	SOC data extracted from figure. Yield baseline data extracted from figure and endline calculated from info in Table 2 Schulz 2017		Yes	Yes	Yes	No	ELCI	ELCI	Germany	Gladbacherhof	50.393	8.193	Split plot	14x36	504	4		14	Every year 1998-2009, plus 2012, 2015	NS		Haplic luvisol	28.5	68	3.5	1.41	7	CaCl2	Bulk density average from 2009. pH range from 6.5-7.5.	1	1	2	0	1	3	High	1998	2015
2020UPDTCCLA136	F. Schulz; A. Gattinger; C. Brock; G. Leithold	2017	Organic farming with livestock raising vs. stockless farming - development of soil organic matter stocks and cash crop yields	An organic long-term field experiment with two factors has been carried out since 1998 at the experimental station Gladbacherhof, University of Giebetaen, Germany. The effects of different farm types (with and without livestock raising) combined with tillage treatments on plants, soil and environment have been investigated. This article presents results on soil fertility and cash crop yields acco…	Scientific Track “Innovative Research for Organic Agriculture 3.0” 19th Organic World Congress, New Delhi, India, November 9-11, 2017 Organized by ISOFAR, NCOF and TIPI	1		344-347	2020UPDTCCLA134, 2020UPDTCCLA135, BROCK11V174.3 (2020UPDTCCLA164b)	F. Schulz, C. Brock, G. Leithold (2008) Effects of Farm Type and Different Intensities of Soil Tillage on Cash Crop Yields and Soil Organic Matter. 16th IFOAM Organic World Congress, Modena, Italy, June 16-20, 2008. F. Schulz, C. Brock, H. Schmidt, K-P Franza, G. Leithold (2014) Development of soil organic matter stocks under different farm types and tillage systems in the Organic Arable Farming …	2020UPDTCCLA136	SOC data extracted from figure. Yield baseline data extracted from figure and endline calculated from info in Table 2 Schulz 2017		Yes	Yes	Yes	No	ELCI	ELCI	Germany	Gladbacherhof	50.393	8.193	Split plot	14x36	504	4		14	Every year 1998-2009, plus 2012, 2015	NS		Haplic luvisol	28.5	68	3.5	1.41	7	CaCl2	Bulk density average from 2009. pH range from 6.5-7.5.	1	1	2	0	1	3	High	1998	2015
2020UPDTCCLA136	F. Schulz; A. Gattinger; C. Brock; G. Leithold	2017	Organic farming with livestock raising vs. stockless farming - development of soil organic matter stocks and cash crop yields	An organic long-term field experiment with two factors has been carried out since 1998 at the experimental station Gladbacherhof, University of Giebetaen, Germany. The effects of different farm types (with and without livestock raising) combined with tillage treatments on plants, soil and environment have been investigated. This article presents results on soil fertility and cash crop yields acco…	Scientific Track “Innovative Research for Organic Agriculture 3.0” 19th Organic World Congress, New Delhi, India, November 9-11, 2017 Organized by ISOFAR, NCOF and TIPI	1		344-347	2020UPDTCCLA134, 2020UPDTCCLA135, BROCK11V174.3 (2020UPDTCCLA164b)	F. Schulz, C. Brock, G. Leithold (2008) Effects of Farm Type and Different Intensities of Soil Tillage on Cash Crop Yields and Soil Organic Matter. 16th IFOAM Organic World Congress, Modena, Italy, June 16-20, 2008. F. Schulz, C. Brock, H. Schmidt, K-P Franza, G. Leithold (2014) Development of soil organic matter stocks under different farm types and tillage systems in the Organic Arable Farming …	2020UPDTCCLA136	Yield data calculated from info in Table 2 Schulz 2017	Yes			Yes	No	CI	ELCI	Germany	Gladbacherhof	50.393	8.193	Split plot	14x36	504	4		1		NS		Haplic luvisol	28.5	68	3.5	1.41	7	CaCl2	Bulk density average from 2009, but likely to be wrong as Knebl present ANOVA results for bulk density. pH range from 6.5-7.5.	1	0	2	0	2	3	High	1998	2015
2020UPDTCCLA136	F. Schulz; A. Gattinger; C. Brock; G. Leithold	2017	Organic farming with livestock raising vs. stockless farming - development of soil organic matter stocks and cash crop yields	An organic long-term field experiment with two factors has been carried out since 1998 at the experimental station Gladbacherhof, University of Giebetaen, Germany. The effects of different farm types (with and without livestock raising) combined with tillage treatments on plants, soil and environment have been investigated. This article presents results on soil fertility and cash crop yields acco…	Scientific Track “Innovative Research for Organic Agriculture 3.0” 19th Organic World Congress, New Delhi, India, November 9-11, 2017 Organized by ISOFAR, NCOF and TIPI	1		344-347	2020UPDTCCLA134, 2020UPDTCCLA135, BROCK11V174.3 (2020UPDTCCLA164b)	F. Schulz, C. Brock, G. Leithold (2008) Effects of Farm Type and Different Intensities of Soil Tillage on Cash Crop Yields and Soil Organic Matter. 16th IFOAM Organic World Congress, Modena, Italy, June 16-20, 2008. F. Schulz, C. Brock, H. Schmidt, K-P Franza, G. Leithold (2014) Development of soil organic matter stocks under different farm types and tillage systems in the Organic Arable Farming …	2020UPDTCCLA136	Yield data calculated from info in Table 2 Schulz 2017	Yes			Yes	No	CI	ELCI	Germany	Gladbacherhof	50.393	8.193	Split plot	14x36	504	4		1		NS		Haplic luvisol	28.5	68	3.5	1.41	7	CaCl2	Bulk density average from 2009, but likely to be wrong as Knebl present ANOVA results for bulk density. pH range from 6.5-7.5.	1	0	2	0	2	3	High	1998	2015
2020UPDTCCLA136	F. Schulz; A. Gattinger; C. Brock; G. Leithold	2017	Organic farming with livestock raising vs. stockless farming - development of soil organic matter stocks and cash crop yields	An organic long-term field experiment with two factors has been carried out since 1998 at the experimental station Gladbacherhof, University of Giebetaen, Germany. The effects of different farm types (with and without livestock raising) combined with tillage treatments on plants, soil and environment have been investigated. This article presents results on soil fertility and cash crop yields acco…	Scientific Track “Innovative Research for Organic Agriculture 3.0” 19th Organic World Congress, New Delhi, India, November 9-11, 2017 Organized by ISOFAR, NCOF and TIPI	1		344-347	2020UPDTCCLA134, 2020UPDTCCLA135, BROCK11V174.3 (2020UPDTCCLA164b)	F. Schulz, C. Brock, G. Leithold (2008) Effects of Farm Type and Different Intensities of Soil Tillage on Cash Crop Yields and Soil Organic Matter. 16th IFOAM Organic World Congress, Modena, Italy, June 16-20, 2008. F. Schulz, C. Brock, H. Schmidt, K-P Franza, G. Leithold (2014) Development of soil organic matter stocks under different farm types and tillage systems in the Organic Arable Farming …	2020UPDTCCLA136	Yield data calculated from info in Table 2 Schulz 2017	Yes			Yes	No	CI	ELCI	Germany	Gladbacherhof	50.393	8.193	Split plot	14x36	504	4		1		NS		Haplic luvisol	28.5	68	3.5	1.41	7	CaCl2	Bulk density average from 2009, but likely to be wrong as Knebl present ANOVA results for bulk density. pH range from 6.5-7.5.	1	0	2	0	2	3	High	1998	2015
2020UPDTCCLA136	F. Schulz; A. Gattinger; C. Brock; G. Leithold	2017	Organic farming with livestock raising vs. stockless farming - development of soil organic matter stocks and cash crop yields	An organic long-term field experiment with two factors has been carried out since 1998 at the experimental station Gladbacherhof, University of Giebetaen, Germany. The effects of different farm types (with and without livestock raising) combined with tillage treatments on plants, soil and environment have been investigated. This article presents results on soil fertility and cash crop yields acco…	Scientific Track “Innovative Research for Organic Agriculture 3.0” 19th Organic World Congress, New Delhi, India, November 9-11, 2017 Organized by ISOFAR, NCOF and TIPI	1		344-347	2020UPDTCCLA134, 2020UPDTCCLA135, BROCK11V174.3 (2020UPDTCCLA164b)	F. Schulz, C. Brock, G. Leithold (2008) Effects of Farm Type and Different Intensities of Soil Tillage on Cash Crop Yields and Soil Organic Matter. 16th IFOAM Organic World Congress, Modena, Italy, June 16-20, 2008. F. Schulz, C. Brock, H. Schmidt, K-P Franza, G. Leithold (2014) Development of soil organic matter stocks under different farm types and tillage systems in the Organic Arable Farming …	2020UPDTCCLA136	Yield data calculated from info in Table 2 Schulz 2017	Yes			Yes	No	CI	ELCI	Germany	Gladbacherhof	50.393	8.193	Split plot	14x36	504	4		1		NS		Haplic luvisol	28.5	68	3.5	1.41	7	CaCl2	Bulk density average from 2009, but likely to be wrong as Knebl present ANOVA results for bulk density. pH range from 6.5-7.5.	1	0	2	0	2	3	High	1998	2015
2020UPDTCCLAsnowball161	J. Constantin, B. Mary, F. Laurent, G. Aubrion, A. Fontaine, P. Kerveillant, N. Beaudoin	2010	Effects of catch crops, no till and reduced nitrogen fertilization on nitrogen leaching and balance in three long-term experiments	Improved agricultural practices are encouraged to reduce nitrate leaching and greenhouse gas emissions. However, the effects of these practices are often studied at annual or rotation scale without considering their long-term impacts. We have evaluated the effects of catch crops (CC), no-till (NT) and reduced nitrogen fertilization (N􏰀) on nitrogen fate in soil–plant system during 13–17 years in …	Agriculture, Ecosystems & Environment	135		268-278			2020UPDTCCLAsnowball161a		Yes	Yes		Yes	No	CI	ELCI	France	Arvalis-Institut du Végétal, Boigneville	48.33	2.38	NS		432	3		1	sampled 5 times between 2007-08 after 13-17 years of treatment	4		Haplic luvisol				1.42				1	0	0	0	2	1	Low	1991	2007
2020UPDTCCLAsnowball161	J. Constantin, B. Mary, F. Laurent, G. Aubrion, A. Fontaine, P. Kerveillant, N. Beaudoin	2010	Effects of catch crops, no till and reduced nitrogen fertilization on nitrogen leaching and balance in three long-term experiments	Improved agricultural practices are encouraged to reduce nitrate leaching and greenhouse gas emissions. However, the effects of these practices are often studied at annual or rotation scale without considering their long-term impacts. We have evaluated the effects of catch crops (CC), no-till (NT) and reduced nitrogen fertilization (N􏰀) on nitrogen fate in soil–plant system during 13–17 years in …	Agriculture, Ecosystems & Environment	135		268-278			2020UPDTCCLAsnowball161a		Yes	Yes		Yes	No	CI	ELCI	France	Arvalis-Institut du Végétal, Boigneville	48.33	2.38	NS		432	3		1	sampled 5 times between 2007-08 after 13-17 years of treatment	4		Haplic luvisol				1.42				1	0	0	0	2	1	Low	1991	2007
2020UPDTCCLAsnowball161	J. Constantin, B. Mary, F. Laurent, G. Aubrion, A. Fontaine, P. Kerveillant, N. Beaudoin	2010	Effects of catch crops, no till and reduced nitrogen fertilization on nitrogen leaching and balance in three long-term experiments	Improved agricultural practices are encouraged to reduce nitrate leaching and greenhouse gas emissions. However, the effects of these practices are often studied at annual or rotation scale without considering their long-term impacts. We have evaluated the effects of catch crops (CC), no-till (NT) and reduced nitrogen fertilization (N􏰀) on nitrogen fate in soil–plant system during 13–17 years in …	Agriculture, Ecosystems & Environment	135		268-278			2020UPDTCCLAsnowball161a		Yes	Yes		Yes	No	CI	ELCI	France	Arvalis-Institut du Végétal, Boigneville	48.33	2.38	NS		432	3		1	sampled 5 times between 2007-08 after 13-17 years of treatment	4		Haplic luvisol				1.52				1	0	0	0	2	1	Low	1991	2007
2020UPDTCCLAsnowball161	J. Constantin, B. Mary, F. Laurent, G. Aubrion, A. Fontaine, P. Kerveillant, N. Beaudoin	2010	Effects of catch crops, no till and reduced nitrogen fertilization on nitrogen leaching and balance in three long-term experiments	Improved agricultural practices are encouraged to reduce nitrate leaching and greenhouse gas emissions. However, the effects of these practices are often studied at annual or rotation scale without considering their long-term impacts. We have evaluated the effects of catch crops (CC), no-till (NT) and reduced nitrogen fertilization (N􏰀) on nitrogen fate in soil–plant system during 13–17 years in …	Agriculture, Ecosystems & Environment	135		268-278			2020UPDTCCLAsnowball161a		Yes	Yes		Yes	No	CI	ELCI	France	Arvalis-Institut du Végétal, Boigneville	48.33	2.38	NS		432	3		1	sampled 5 times between 2007-08 after 13-17 years of treatment	4		Haplic luvisol				1.52				1	0	0	0	2	1	Low	1991	2007
2020UPDTCCLAsnowball161	J. Constantin, B. Mary, F. Laurent, G. Aubrion, A. Fontaine, P. Kerveillant, N. Beaudoin	2010	Effects of catch crops, no till and reduced nitrogen fertilization on nitrogen leaching and balance in three long-term experiments	Improved agricultural practices are encouraged to reduce nitrate leaching and greenhouse gas emissions. However, the effects of these practices are often studied at annual or rotation scale without considering their long-term impacts. We have evaluated the effects of catch crops (CC), no-till (NT) and reduced nitrogen fertilization (N􏰀) on nitrogen fate in soil–plant system during 13–17 years in …	Agriculture, Ecosystems & Environment	135		268-278			2020UPDTCCLAsnowball161b			Yes		Yes	No	CI	ELCI	France	Kerlavic	48.05	-4.067	NS		260	3		1	sampled 5 times between 2007-08 after 13-17 years of treatment	4		Dystric cambisol				1.26				1	0	0	0	2	1	Low	1994	2007
2020UPDTCCLAsnowball161	J. Constantin, B. Mary, F. Laurent, G. Aubrion, A. Fontaine, P. Kerveillant, N. Beaudoin	2010	Effects of catch crops, no till and reduced nitrogen fertilization on nitrogen leaching and balance in three long-term experiments	Improved agricultural practices are encouraged to reduce nitrate leaching and greenhouse gas emissions. However, the effects of these practices are often studied at annual or rotation scale without considering their long-term impacts. We have evaluated the effects of catch crops (CC), no-till (NT) and reduced nitrogen fertilization (N􏰀) on nitrogen fate in soil–plant system during 13–17 years in …	Agriculture, Ecosystems & Environment	135		268-278			2020UPDTCCLAsnowball161b			Yes		Yes	No	CI	ELCI	France	Kerlavic	48.05	-4.067	NS		260	3		1	sampled 5 times between 2007-08 after 13-17 years of treatment	4		Dystric cambisol				1.26				1	0	0	0	2	1	Low	1994	2007
2020UPDTCCLAsnowball161	J. Constantin, B. Mary, F. Laurent, G. Aubrion, A. Fontaine, P. Kerveillant, N. Beaudoin	2010	Effects of catch crops, no till and reduced nitrogen fertilization on nitrogen leaching and balance in three long-term experiments	Improved agricultural practices are encouraged to reduce nitrate leaching and greenhouse gas emissions. However, the effects of these practices are often studied at annual or rotation scale without considering their long-term impacts. We have evaluated the effects of catch crops (CC), no-till (NT) and reduced nitrogen fertilization (N􏰀) on nitrogen fate in soil–plant system during 13–17 years in …	Agriculture, Ecosystems & Environment	135		268-278			2020UPDTCCLAsnowball161c			Yes		Yes	No	CI	ELCI	France	Thibie	48.933	4.233	NS		1044	3		1	sampled 5 times between 2007-08 after 13-17 years of treatment	4		Rendzina				1.36				1	0	0	0	2	1	Low	1990	2003
2020UPDTCCLAsnowball161	J. Constantin, B. Mary, F. Laurent, G. Aubrion, A. Fontaine, P. Kerveillant, N. Beaudoin	2010	Effects of catch crops, no till and reduced nitrogen fertilization on nitrogen leaching and balance in three long-term experiments	Improved agricultural practices are encouraged to reduce nitrate leaching and greenhouse gas emissions. However, the effects of these practices are often studied at annual or rotation scale without considering their long-term impacts. We have evaluated the effects of catch crops (CC), no-till (NT) and reduced nitrogen fertilization (N􏰀) on nitrogen fate in soil–plant system during 13–17 years in …	Agriculture, Ecosystems & Environment	135		268-278			2020UPDTCCLAsnowball161c			Yes		Yes	No	CI	ELCI	France	Thibie	48.933	4.233	NS		1044	3		1	sampled 5 times between 2007-08 after 13-17 years of treatment	4		Rendzina				1.36				1	0	0	0	2	1	Low	1990	2003
2020UPDTCCLAsnowball161	J. Constantin, B. Mary, F. Laurent, G. Aubrion, A. Fontaine, P. Kerveillant, N. Beaudoin	2010	Effects of catch crops, no till and reduced nitrogen fertilization on nitrogen leaching and balance in three long-term experiments	Improved agricultural practices are encouraged to reduce nitrate leaching and greenhouse gas emissions. However, the effects of these practices are often studied at annual or rotation scale without considering their long-term impacts. We have evaluated the effects of catch crops (CC), no-till (NT) and reduced nitrogen fertilization (N􏰀) on nitrogen fate in soil–plant system during 13–17 years in …	Agriculture, Ecosystems & Environment	135		268-278			2020UPDTCCLAsnowball161c			Yes		Yes	No	CI	ELCI	France	Thibie	48.933	4.233	NS		1044	3		1	sampled 5 times between 2007-08 after 13-17 years of treatment	4		Rendzina				1.36				1	0	0	0	2	1	Low	1990	2003
2020UPDTCCLAsnowball161	J. Constantin, B. Mary, F. Laurent, G. Aubrion, A. Fontaine, P. Kerveillant, N. Beaudoin	2010	Effects of catch crops, no till and reduced nitrogen fertilization on nitrogen leaching and balance in three long-term experiments	Improved agricultural practices are encouraged to reduce nitrate leaching and greenhouse gas emissions. However, the effects of these practices are often studied at annual or rotation scale without considering their long-term impacts. We have evaluated the effects of catch crops (CC), no-till (NT) and reduced nitrogen fertilization (N􏰀) on nitrogen fate in soil–plant system during 13–17 years in …	Agriculture, Ecosystems & Environment	135		268-278			2020UPDTCCLAsnowball161c			Yes		Yes	No	CI	ELCI	France	Thibie	48.933	4.233	NS		1044	3		1	sampled 5 times between 2007-08 after 13-17 years of treatment	4		Rendzina				1.36				1	0	0	0	2	1	Low	1990	2003
2020UPDTCCLAsnowball162_THOMS04V20.1	I.K. Thomsen & B.T. Christensen	2004	Yields of wheat and soil carbon and nitrogen contents following long-term incorporation of barley straw and ryegrass catch crops	Three successive crops of winter wheat were grown on a sandy loam to test the residual effect of long-term annual incorporation of spring barley straw at rates of 0, 4, 8 and 12tha21, and ryegrass catch crops with or without additions of pig slurry. Soil receiving 4, 8 and 12tha21 of straw annually for 18 years contained 12, 21 and 30% more carbon (C), respectively, than soil with straw removal, …	Soil Use and Management	20		432-438	2020UPDTCCLAhdwymissed184a	I. K. Thomsen (1995) Catch crop and animal slurry in spring barley grown with straw incorporation. Acta Agriculturae Scandinavica. Section B, Soil and Plant Science. 45(3) 166-170	2020UPDTCCLAsnowball162_THOMS04V20.1	Pooled SOC values across straw treatments. Endline yield data extracted from figure. Baseline yield data in 3D figure, unable to extract so attempted to contact author.		Yes		Yes	Yes	ELCI	ELCI	Denmark	Askov Experimental Station	55.471	9.111	Split-split plot		45.2	3		2					11.2	16	69.4	1.5	6.5	NS	Bulk density assumed not measured	1	0	2	0	1	3	High	1989	1998
2020UPDTCCLAsnowball162_THOMS04V20.1	I.K. Thomsen & B.T. Christensen	2004	Yields of wheat and soil carbon and nitrogen contents following long-term incorporation of barley straw and ryegrass catch crops	Three successive crops of winter wheat were grown on a sandy loam to test the residual effect of long-term annual incorporation of spring barley straw at rates of 0, 4, 8 and 12tha21, and ryegrass catch crops with or without additions of pig slurry. Soil receiving 4, 8 and 12tha21 of straw annually for 18 years contained 12, 21 and 30% more carbon (C), respectively, than soil with straw removal, …	Soil Use and Management	20		432-438	2020UPDTCCLAhdwymissed184a	I. K. Thomsen (1995) Catch crop and animal slurry in spring barley grown with straw incorporation. Acta Agriculturae Scandinavica. Section B, Soil and Plant Science. 45(3) 166-170	2020UPDTCCLAsnowball162_THOMS04V20.1	Pooled SOC values across straw treatments. Endline yield data extracted from figure. Baseline yield data in 3D figure, unable to extract so attempted to contact author.		Yes		Yes	Yes	ELCI	ELCI	Denmark	Askov Experimental Station	55.471	9.111	Split-split plot		45.2	3		2					11.2	16	69.4	1.5	6.5	NS	Bulk density assumed not measured	1	0	2	0	1	3	High	1989	1998
2020UPDTCCLAsnowball162_THOMS04V20.1	I.K. Thomsen & B.T. Christensen	2004	Yields of wheat and soil carbon and nitrogen contents following long-term incorporation of barley straw and ryegrass catch crops	Three successive crops of winter wheat were grown on a sandy loam to test the residual effect of long-term annual incorporation of spring barley straw at rates of 0, 4, 8 and 12tha21, and ryegrass catch crops with or without additions of pig slurry. Soil receiving 4, 8 and 12tha21 of straw annually for 18 years contained 12, 21 and 30% more carbon (C), respectively, than soil with straw removal, …	Soil Use and Management	20		432-438	2020UPDTCCLAhdwymissed184a	I. K. Thomsen (1995) Catch crop and animal slurry in spring barley grown with straw incorporation. Acta Agriculturae Scandinavica. Section B, Soil and Plant Science. 45(3) 166-170	2020UPDTCCLAsnowball162_THOMS04V20.1	Pooled SOC values across straw treatments. Endline yield data extracted from figure. Baseline yield data in 3D figure, unable to extract so attempted to contact author.		Yes		Yes	Yes	ELCI	ELCI	Denmark	Askov Experimental Station	55.471	9.111	Split-split plot		45.2	3		2					11.2	16	69.4	1.5	6.5	NS	Bulk density assumed not measured	1	0	2	0	1	3	High	1989	1998
2020UPDTCCLAhdwymissed184	I. K. Thomsen	1995	Catch crop and animal slurry in spring barley grown with straw incorporation	In field experiments in 1989-92 on a sandy loam soil and in 1989-91 on a sandy soil in Denmark, barley was grown with incorporation of 0, 4, 8 or 12 t straw ha<sup>-1</sup> year<sup>-1</sup>, combined with 3 catch crop treatments (no catch crop, a catch crop of Lolium perenne, or a catch crop + 35 t pig slurry ha<sup>-1</sup>) and 0, 50, 100 or 125 kg N ha<sup>-1</sup> year<sup>-1</sup>. From 198…	Acta Agriculturae Scandinavica. Section B, Soil and Plant Science	45	3	166-170			2020UPDTCCLAhdwymissed184b			Yes		No	No	CI	CI	Denmark	Lundgard Experimental Station	55.47	9.19	Split-split plot		45.2	3		1					5.5	5.3	86.6				Sampling depth not specified, but assume 20 based on Thomsen 2004	1	0	2	-2	0	3	High	1989	1992
2020UPDTCCLAhdwymissed184	I. K. Thomsen	1995	Catch crop and animal slurry in spring barley grown with straw incorporation	In field experiments in 1989-92 on a sandy loam soil and in 1989-91 on a sandy soil in Denmark, barley was grown with incorporation of 0, 4, 8 or 12 t straw ha<sup>-1</sup> year<sup>-1</sup>, combined with 3 catch crop treatments (no catch crop, a catch crop of Lolium perenne, or a catch crop + 35 t pig slurry ha<sup>-1</sup>) and 0, 50, 100 or 125 kg N ha<sup>-1</sup> year<sup>-1</sup>. From 198…	Acta Agriculturae Scandinavica. Section B, Soil and Plant Science	45	3	166-170			2020UPDTCCLAhdwymissed184b			Yes		No	No	CI	CI	Denmark	Lundgard Experimental Station	55.47	9.19	Split-split plot		45.2	3		1					5.5	5.3	86.6				Sampling depth not specified, but assume 20 based on Thomsen 2004	1	0	2	-2	0	3	High	1989	1992
2020UPDTCCLAhdwymissed184	I. K. Thomsen	1995	Catch crop and animal slurry in spring barley grown with straw incorporation	In field experiments in 1989-92 on a sandy loam soil and in 1989-91 on a sandy soil in Denmark, barley was grown with incorporation of 0, 4, 8 or 12 t straw ha<sup>-1</sup> year<sup>-1</sup>, combined with 3 catch crop treatments (no catch crop, a catch crop of Lolium perenne, or a catch crop + 35 t pig slurry ha<sup>-1</sup>) and 0, 50, 100 or 125 kg N ha<sup>-1</sup> year<sup>-1</sup>. From 198…	Acta Agriculturae Scandinavica. Section B, Soil and Plant Science	45	3	166-170			2020UPDTCCLAhdwymissed184b			Yes		No	No	CI	CI	Denmark	Lundgard Experimental Station	55.47	9.19	Split-split plot		45.2	3		1					5.5	5.3	86.6				Sampling depth not specified, but assume 20 based on Thomsen 2004	1	0	2	-2	0	3	High	1989	1992
2020UPDTCCLAhdwymissed184	I. K. Thomsen	1995	Catch crop and animal slurry in spring barley grown with straw incorporation	In field experiments in 1989-92 on a sandy loam soil and in 1989-91 on a sandy soil in Denmark, barley was grown with incorporation of 0, 4, 8 or 12 t straw ha<sup>-1</sup> year<sup>-1</sup>, combined with 3 catch crop treatments (no catch crop, a catch crop of Lolium perenne, or a catch crop + 35 t pig slurry ha<sup>-1</sup>) and 0, 50, 100 or 125 kg N ha<sup>-1</sup> year<sup>-1</sup>. From 198…	Acta Agriculturae Scandinavica. Section B, Soil and Plant Science	45	3	166-170			2020UPDTCCLAhdwymissed184b			Yes		No	No	CI	CI	Denmark	Lundgard Experimental Station	55.47	9.19	Split-split plot		45.2	3		1					5.5	5.3	86.6				Sampling depth not specified, but assume 20 based on Thomsen 2004	1	0	2	-2	0	3	High	1989	1992
2020UPDTCCLAhdwymissed184	I. K. Thomsen	1995	Catch crop and animal slurry in spring barley grown with straw incorporation	In field experiments in 1989-92 on a sandy loam soil and in 1989-91 on a sandy soil in Denmark, barley was grown with incorporation of 0, 4, 8 or 12 t straw ha<sup>-1</sup> year<sup>-1</sup>, combined with 3 catch crop treatments (no catch crop, a catch crop of Lolium perenne, or a catch crop + 35 t pig slurry ha<sup>-1</sup>) and 0, 50, 100 or 125 kg N ha<sup>-1</sup> year<sup>-1</sup>. From 198…	Acta Agriculturae Scandinavica. Section B, Soil and Plant Science	45	3	166-170			2020UPDTCCLAhdwymissed184b			Yes		No	No	CI	CI	Denmark	Lundgard Experimental Station	55.47	9.19	Split-split plot		45.2	3		1					5.5	5.3	86.6				Sampling depth not specified, but assume 20 based on Thomsen 2004	1	0	2	-2	0	3	High	1989	1992
2020UPDTCCLAhdwymissed184	I. K. Thomsen	1995	Catch crop and animal slurry in spring barley grown with straw incorporation	In field experiments in 1989-92 on a sandy loam soil and in 1989-91 on a sandy soil in Denmark, barley was grown with incorporation of 0, 4, 8 or 12 t straw ha<sup>-1</sup> year<sup>-1</sup>, combined with 3 catch crop treatments (no catch crop, a catch crop of Lolium perenne, or a catch crop + 35 t pig slurry ha<sup>-1</sup>) and 0, 50, 100 or 125 kg N ha<sup>-1</sup> year<sup>-1</sup>. From 198…	Acta Agriculturae Scandinavica. Section B, Soil and Plant Science	45	3	166-170			2020UPDTCCLAhdwymissed184b			Yes		No	No	CI	CI	Denmark	Lundgard Experimental Station	55.47	9.19	Split-split plot		45.2	3		1					5.5	5.3	86.6				Sampling depth not specified, but assume 20 based on Thomsen 2004	1	0	2	-2	0	3	High	1989	1992
2020UPDTCCLAhdwymissed184	I. K. Thomsen	1995	Catch crop and animal slurry in spring barley grown with straw incorporation	In field experiments in 1989-92 on a sandy loam soil and in 1989-91 on a sandy soil in Denmark, barley was grown with incorporation of 0, 4, 8 or 12 t straw ha<sup>-1</sup> year<sup>-1</sup>, combined with 3 catch crop treatments (no catch crop, a catch crop of Lolium perenne, or a catch crop + 35 t pig slurry ha<sup>-1</sup>) and 0, 50, 100 or 125 kg N ha<sup>-1</sup> year<sup>-1</sup>. From 198…	Acta Agriculturae Scandinavica. Section B, Soil and Plant Science	45	3	166-170			2020UPDTCCLAhdwymissed184b			Yes		No	No	CI	CI	Denmark	Lundgard Experimental Station	55.47	9.19	Split-split plot		45.2	3		1					5.5	5.3	86.6				Sampling depth not specified, but assume 20 based on Thomsen 2004	1	0	2	-2	0	3	High	1989	1992
2020UPDTCCLAhdwymissed184	I. K. Thomsen	1995	Catch crop and animal slurry in spring barley grown with straw incorporation	In field experiments in 1989-92 on a sandy loam soil and in 1989-91 on a sandy soil in Denmark, barley was grown with incorporation of 0, 4, 8 or 12 t straw ha<sup>-1</sup> year<sup>-1</sup>, combined with 3 catch crop treatments (no catch crop, a catch crop of Lolium perenne, or a catch crop + 35 t pig slurry ha<sup>-1</sup>) and 0, 50, 100 or 125 kg N ha<sup>-1</sup> year<sup>-1</sup>. From 198…	Acta Agriculturae Scandinavica. Section B, Soil and Plant Science	45	3	166-170			2020UPDTCCLAhdwymissed184b			Yes		No	No	CI	CI	Denmark	Lundgard Experimental Station	55.47	9.19	Split-split plot		45.2	3		1					5.5	5.3	86.6				Sampling depth not specified, but assume 20 based on Thomsen 2004	1	0	2	-2	0	3	High	1989	1992
2020UPDTCCLAhdwymissed184	I. K. Thomsen	1995	Catch crop and animal slurry in spring barley grown with straw incorporation	In field experiments in 1989-92 on a sandy loam soil and in 1989-91 on a sandy soil in Denmark, barley was grown with incorporation of 0, 4, 8 or 12 t straw ha<sup>-1</sup> year<sup>-1</sup>, combined with 3 catch crop treatments (no catch crop, a catch crop of Lolium perenne, or a catch crop + 35 t pig slurry ha<sup>-1</sup>) and 0, 50, 100 or 125 kg N ha<sup>-1</sup> year<sup>-1</sup>. From 198…	Acta Agriculturae Scandinavica. Section B, Soil and Plant Science	45	3	166-170			2020UPDTCCLAhdwymissed184b			Yes		No	No	CI	CI	Denmark	Lundgard Experimental Station	55.47	9.19	Split-split plot		45.2	3		1					5.5	5.3	86.6				Sampling depth not specified, but assume 20 based on Thomsen 2004	1	0	2	-2	0	3	High	1989	1992
2020UPDTCCLAhdwymissed184	I. K. Thomsen	1995	Catch crop and animal slurry in spring barley grown with straw incorporation	In field experiments in 1989-92 on a sandy loam soil and in 1989-91 on a sandy soil in Denmark, barley was grown with incorporation of 0, 4, 8 or 12 t straw ha<sup>-1</sup> year<sup>-1</sup>, combined with 3 catch crop treatments (no catch crop, a catch crop of Lolium perenne, or a catch crop + 35 t pig slurry ha<sup>-1</sup>) and 0, 50, 100 or 125 kg N ha<sup>-1</sup> year<sup>-1</sup>. From 198…	Acta Agriculturae Scandinavica. Section B, Soil and Plant Science	45	3	166-170			2020UPDTCCLAhdwymissed184b			Yes		No	No	CI	CI	Denmark	Lundgard Experimental Station	55.47	9.19	Split-split plot		45.2	3		1					5.5	5.3	86.6				Sampling depth not specified, but assume 20 based on Thomsen 2004	1	0	2	-2	0	3	High	1989	1992
2020UPDTCCLAhdwymissed184	I. K. Thomsen	1995	Catch crop and animal slurry in spring barley grown with straw incorporation	In field experiments in 1989-92 on a sandy loam soil and in 1989-91 on a sandy soil in Denmark, barley was grown with incorporation of 0, 4, 8 or 12 t straw ha<sup>-1</sup> year<sup>-1</sup>, combined with 3 catch crop treatments (no catch crop, a catch crop of Lolium perenne, or a catch crop + 35 t pig slurry ha<sup>-1</sup>) and 0, 50, 100 or 125 kg N ha<sup>-1</sup> year<sup>-1</sup>. From 198…	Acta Agriculturae Scandinavica. Section B, Soil and Plant Science	45	3	166-170			2020UPDTCCLAhdwymissed184b			Yes		No	No	CI	CI	Denmark	Lundgard Experimental Station	55.47	9.19	Split-split plot		45.2	3		1					5.5	5.3	86.6				Sampling depth not specified, but assume 20 based on Thomsen 2004	1	0	2	-2	0	3	High	1989	1992
2020UPDTCCLAhdwymissed184	I. K. Thomsen	1995	Catch crop and animal slurry in spring barley grown with straw incorporation	In field experiments in 1989-92 on a sandy loam soil and in 1989-91 on a sandy soil in Denmark, barley was grown with incorporation of 0, 4, 8 or 12 t straw ha<sup>-1</sup> year<sup>-1</sup>, combined with 3 catch crop treatments (no catch crop, a catch crop of Lolium perenne, or a catch crop + 35 t pig slurry ha<sup>-1</sup>) and 0, 50, 100 or 125 kg N ha<sup>-1</sup> year<sup>-1</sup>. From 198…	Acta Agriculturae Scandinavica. Section B, Soil and Plant Science	45	3	166-170			2020UPDTCCLAhdwymissed184b			Yes		No	No	CI	CI	Denmark	Lundgard Experimental Station	55.47	9.19	Split-split plot		45.2	3		1					5.5	5.3	86.6				Sampling depth not specified, but assume 20 based on Thomsen 2004	1	0	2	-2	0	3	High	1989	1992
TAYLO06V144.2	B. R. Taylor, D. Younie, S. Matheson, M. Coutts, C. Mayer, C. A. Watson, R. L. Walker	2006	Output and sustainability of organic ley/arable crop rotations at two sites in northern Scotland	Trials at Tulloch, Aberdeen (sandy loam soil, 820 mm rainfall) and Woodside, Elgin (light sandy loam, 730 mm) compared organically managed crop rotations containing different proportions of spring oats, swedes, potatoes and grass/clover leys (0.50 and 0.67 of the rotation at Tulloch ; 0.38 and 0.50 at Woodside). The trials simulated farm conditions through the use of grazing animals and the recyc…	Journal of Agricultural Science	144		435-447			TAYLO06V144.2a	SOC data extracted from figure			Yes	No	Yes	ELCI	CI	Scotland	Tulloch	57.183	-2.25	Purposeful	27x30	810	2		12	Annual			Sandy loam								0	2	?	0	0	?	Unclear	1992	2003
TAYLO06V144.2	B. R. Taylor, D. Younie, S. Matheson, M. Coutts, C. Mayer, C. A. Watson, R. L. Walker	2006	Output and sustainability of organic ley/arable crop rotations at two sites in northern Scotland	Trials at Tulloch, Aberdeen (sandy loam soil, 820 mm rainfall) and Woodside, Elgin (light sandy loam, 730 mm) compared organically managed crop rotations containing different proportions of spring oats, swedes, potatoes and grass/clover leys (0.50 and 0.67 of the rotation at Tulloch ; 0.38 and 0.50 at Woodside). The trials simulated farm conditions through the use of grazing animals and the recyc…	Journal of Agricultural Science	144		435-447			TAYLO06V144.2a	SOC data extracted from figure			Yes	No	Yes	ELCI	CI	Scotland	Tulloch	57.183	-2.25	Purposeful	27x30	810	2		12	Annual			Sandy loam								0	2	?	0	0	?	Unclear	1992	2003
TAYLO06V144.2	B. R. Taylor, D. Younie, S. Matheson, M. Coutts, C. Mayer, C. A. Watson, R. L. Walker	2006	Output and sustainability of organic ley/arable crop rotations at two sites in northern Scotland	Trials at Tulloch, Aberdeen (sandy loam soil, 820 mm rainfall) and Woodside, Elgin (light sandy loam, 730 mm) compared organically managed crop rotations containing different proportions of spring oats, swedes, potatoes and grass/clover leys (0.50 and 0.67 of the rotation at Tulloch ; 0.38 and 0.50 at Woodside). The trials simulated farm conditions through the use of grazing animals and the recyc…	Journal of Agricultural Science	144		435-447			TAYLO06V144.2b	SOC data extracted from figure			Yes	No	Yes	ELCI	CI	Scotland	Woodside	57.633	-3.4	Purposeful	28x30	840	2		12	Annual			Loamy sand/sandy loam								0	2	?	0	0	?	Unclear	1992	2003
TAYLO06V144.2	B. R. Taylor, D. Younie, S. Matheson, M. Coutts, C. Mayer, C. A. Watson, R. L. Walker	2006	Output and sustainability of organic ley/arable crop rotations at two sites in northern Scotland	Trials at Tulloch, Aberdeen (sandy loam soil, 820 mm rainfall) and Woodside, Elgin (light sandy loam, 730 mm) compared organically managed crop rotations containing different proportions of spring oats, swedes, potatoes and grass/clover leys (0.50 and 0.67 of the rotation at Tulloch ; 0.38 and 0.50 at Woodside). The trials simulated farm conditions through the use of grazing animals and the recyc…	Journal of Agricultural Science	144		435-447			TAYLO06V144.2b	SOC data extracted from figure			Yes	No	Yes	ELCI	CI	Scotland	Woodside	57.633	-3.4	Purposeful	28x30	840	2		12	Annual			Loamy sand/sandy loam								0	2	?	0	0	?	Unclear	1992	2003
BROCK11V174.3	C. Brock, A. Fließbach, H.R. Oberholzer, F. Schulz, K. Wiesinger, F. Reinicke, W. Koch, B. Pallutt, B. Dittman, J. Zimmer, K.J. Hülsbergen, G. Leithold	2011	Relation between soil organic matter and yield levels of nonlegume crops in organic and conventional farming systems	The aim of this study was to evaluate the interaction between yield levels of nonleguminous crops and soil organic matter (SOM) under the specific conditions of organic and conventional farming, respectively, and to identify implications for SOM management in arable farming con- sidering the farming system (organic vs. conventional). For that purpose, correlations between yield levels of nonlegum…	Journal of Plant Nutrition and Soil Science	174		568-575			2020UPDTCCLA164c				Yes	Yes	Yes	CI	CI	Germany	Bad Lauchstädt, Halle-Wittenberg University, Saxony-Anhalt	51.393	11.878				4						Loamy silt								1	?	?	-1	?	?	Unclear	1998	2003
BROCK11V174.3	C. Brock, A. Fließbach, H.R. Oberholzer, F. Schulz, K. Wiesinger, F. Reinicke, W. Koch, B. Pallutt, B. Dittman, J. Zimmer, K.J. Hülsbergen, G. Leithold	2011	Relation between soil organic matter and yield levels of nonlegume crops in organic and conventional farming systems	The aim of this study was to evaluate the interaction between yield levels of nonleguminous crops and soil organic matter (SOM) under the specific conditions of organic and conventional farming, respectively, and to identify implications for SOM management in arable farming con- sidering the farming system (organic vs. conventional). For that purpose, correlations between yield levels of nonlegum…	Journal of Plant Nutrition and Soil Science	174		568-575			2020UPDTCCLA164c				Yes	Yes	Yes	CI	CI	Germany	Bad Lauchstädt, Halle-Wittenberg University, Saxony-Anhalt	51.393	11.878				4						Loamy silt								1	?	?	-1	?	?	Unclear	1998	2003
BROCK11V174.3	C. Brock, A. Fließbach, H.R. Oberholzer, F. Schulz, K. Wiesinger, F. Reinicke, W. Koch, B. Pallutt, B. Dittman, J. Zimmer, K.J. Hülsbergen, G. Leithold	2011	Relation between soil organic matter and yield levels of nonlegume crops in organic and conventional farming systems	The aim of this study was to evaluate the interaction between yield levels of nonleguminous crops and soil organic matter (SOM) under the specific conditions of organic and conventional farming, respectively, and to identify implications for SOM management in arable farming con- sidering the farming system (organic vs. conventional). For that purpose, correlations between yield levels of nonlegum…	Journal of Plant Nutrition and Soil Science	174		568-575			2020UPDTCCLA164c				Yes	Yes	Yes	CI	CI	Germany	Bad Lauchstädt, Halle-Wittenberg University, Saxony-Anhalt	51.393	11.878				4						Loamy silt								1	?	?	-1	?	?	Unclear	1998	2003
BROCK11V174.3	C. Brock, A. Fließbach, H.R. Oberholzer, F. Schulz, K. Wiesinger, F. Reinicke, W. Koch, B. Pallutt, B. Dittman, J. Zimmer, K.J. Hülsbergen, G. Leithold	2011	Relation between soil organic matter and yield levels of nonlegume crops in organic and conventional farming systems	The aim of this study was to evaluate the interaction between yield levels of nonleguminous crops and soil organic matter (SOM) under the specific conditions of organic and conventional farming, respectively, and to identify implications for SOM management in arable farming con- sidering the farming system (organic vs. conventional). For that purpose, correlations between yield levels of nonlegum…	Journal of Plant Nutrition and Soil Science	174		568-575			2020UPDTCCLA164c				Yes	Yes	Yes	CI	CI	Germany	Bad Lauchstädt, Halle-Wittenberg University, Saxony-Anhalt	51.393	11.878				4						Loamy silt								1	?	?	-1	?	?	Unclear	1998	2003
2020UPDT006	M. Apesteguia; I. Virto; L. Orcaray; P. Bescansa; A. Enrique; M. J. Imaz; D. L. Karlen	2017	Tillage effects on soil quality after three years of irrigation in northern Spain	Irrigation is being initiated on large areas of traditionally rainfed land to meet increasing global demand for food, feed, fiber and fuel. However, the consequences of this transition on soil quality (SQ) have scarcely been studied. Therefore, after previously identifying the most tillage-sensitive SQ indicators under long-term rainfed conditions, conversion of a research site on a Haplic Calcis…	Sustainability	9		1476			2020UPDT006		Yes			Yes	Yes	CI	CI	Spain	Olite	42.481	-1.651	Randomised block	9x24	216	4		3		5		Haplic Calcisol	41.3	41.1	17.1	1.64	8.45	H2O	Clay/silt/sand from Imaz et al (2010)	1	0	2	0	0	3	High	1994	2011
2020UPDT006	M. Apesteguia; I. Virto; L. Orcaray; P. Bescansa; A. Enrique; M. J. Imaz; D. L. Karlen	2017	Tillage effects on soil quality after three years of irrigation in northern Spain	Irrigation is being initiated on large areas of traditionally rainfed land to meet increasing global demand for food, feed, fiber and fuel. However, the consequences of this transition on soil quality (SQ) have scarcely been studied. Therefore, after previously identifying the most tillage-sensitive SQ indicators under long-term rainfed conditions, conversion of a research site on a Haplic Calcis…	Sustainability	9		1476			2020UPDT006		Yes			Yes	Yes	CI	CI	Spain	Olite	42.481	-1.651	Randomised block	9x24	216	4		3		5		Haplic Calcisol	41.3	41.1	17.1	1.51	8.42	H2O	Clay/silt/sand from Imaz et al (2010)	1	0	2	0	0	3	High	1994	2011
2020UPDT006	M. Apesteguia; I. Virto; L. Orcaray; P. Bescansa; A. Enrique; M. J. Imaz; D. L. Karlen	2017	Tillage effects on soil quality after three years of irrigation in northern Spain	Irrigation is being initiated on large areas of traditionally rainfed land to meet increasing global demand for food, feed, fiber and fuel. However, the consequences of this transition on soil quality (SQ) have scarcely been studied. Therefore, after previously identifying the most tillage-sensitive SQ indicators under long-term rainfed conditions, conversion of a research site on a Haplic Calcis…	Sustainability	9		1476			2020UPDT006		Yes			Yes	Yes	CI	CI	Spain	Olite	42.481	-1.651	Randomised block	9x24	216	4		3		5		Haplic Calcisol	41.3	41.1	17.1	1.53	8.56	H2O	Clay/silt/sand from Imaz et al (2010)	1	0	2	0	0	3	High	1994	2011
2020UPDT011	B. C. Ball; R. W. Lang; M. F. O'Sullivan; M. F. Franklin	1989	Cultivation and nitrogen requirements for continuous winter barley on a Gleysol and a Cambisol	Long- and short-term direct-drilling and seed broadcasting plus rotovation were examined as alternatives to conventional mouldboard ploughing and drilling. The broadcasting and the short-term direct-drilling treatments were applied to previously chisel-ploughed and deep mouldboard-ploughed treatments, respectively. Autumn nitrogen treatments of 30 or 60 kg/ha and spring nitrogen treatments of 150…	Soil & Tillage Research	13		333-352	Haddaway_till_yield_MA	Soane, BD; Ball, BC (1998) Review of management and conduct of long-term tillage studies with special reference to a 25-yr experiment on barley in Scotland. Soil & Tillage Research 45:17-37	2020UPDT011	SOC and bulk density data extracted from figure	Yes			No	Yes	CI	ELCI	Scotland		55.84	-3.173	Split-split plot	50x12	600	4	4 on cambisol and 4 on gleysol	1\3	SOC\yield			Eutric Cambisol	15.1	35.1	49.7	1.47			Bulk density at 6cm depth (whole depth profile down to 36cm presented)	1	0	2	-2	0	3	High	1983	1986
2020UPDT011	B. C. Ball; R. W. Lang; M. F. O'Sullivan; M. F. Franklin	1989	Cultivation and nitrogen requirements for continuous winter barley on a Gleysol and a Cambisol	Long- and short-term direct-drilling and seed broadcasting plus rotovation were examined as alternatives to conventional mouldboard ploughing and drilling. The broadcasting and the short-term direct-drilling treatments were applied to previously chisel-ploughed and deep mouldboard-ploughed treatments, respectively. Autumn nitrogen treatments of 30 or 60 kg/ha and spring nitrogen treatments of 150…	Soil & Tillage Research	13		333-352	Haddaway_till_yield_MA	Soane, BD; Ball, BC (1998) Review of management and conduct of long-term tillage studies with special reference to a 25-yr experiment on barley in Scotland. Soil & Tillage Research 45:17-37	2020UPDT011	SOC and bulk density data extracted from figure	Yes			No	Yes	BACI	ELCI	Scotland		55.84	-3.173	Split-split plot	50x12	600	4	4 on cambisol and 4 on gleysol	1\3	SOC\yield			Eutric Cambisol	15.1	35.1	49.7	1.28			Bulk density at 6cm depth (whole depth profile down to 36cm presented)	1	0	2	0	0	3	High	1968	1986
2020UPDT011	B. C. Ball; R. W. Lang; M. F. O'Sullivan; M. F. Franklin	1989	Cultivation and nitrogen requirements for continuous winter barley on a Gleysol and a Cambisol	Long- and short-term direct-drilling and seed broadcasting plus rotovation were examined as alternatives to conventional mouldboard ploughing and drilling. The broadcasting and the short-term direct-drilling treatments were applied to previously chisel-ploughed and deep mouldboard-ploughed treatments, respectively. Autumn nitrogen treatments of 30 or 60 kg/ha and spring nitrogen treatments of 150…	Soil & Tillage Research	13		333-352	Haddaway_till_yield_MA	Soane, BD; Ball, BC (1998) Review of management and conduct of long-term tillage studies with special reference to a 25-yr experiment on barley in Scotland. Soil & Tillage Research 45:17-37	2020UPDT011	SOC and bulk density data extracted from figure	Yes			No	Yes	CI	ELCI	Scotland		55.84	-3.173	Split-split plot	50x12	600	4	4 on cambisol and 4 on gleysol	1\3	SOC\yield			Eutric Cambisol	15.1	35.1	49.7	1.3			Bulk density at 6cm depth (whole depth profile down to 36cm presented)	1	0	2	-2	0	3	High	1983	1986
2020UPDT011	B. C. Ball; R. W. Lang; M. F. O'Sullivan; M. F. Franklin	1989	Cultivation and nitrogen requirements for continuous winter barley on a Gleysol and a Cambisol	Long- and short-term direct-drilling and seed broadcasting plus rotovation were examined as alternatives to conventional mouldboard ploughing and drilling. The broadcasting and the short-term direct-drilling treatments were applied to previously chisel-ploughed and deep mouldboard-ploughed treatments, respectively. Autumn nitrogen treatments of 30 or 60 kg/ha and spring nitrogen treatments of 150…	Soil & Tillage Research	13		333-352	Haddaway_till_yield_MA	Soane, BD; Ball, BC (1998) Review of management and conduct of long-term tillage studies with special reference to a 25-yr experiment on barley in Scotland. Soil & Tillage Research 45:17-37	2020UPDT011	SOC and bulk density data extracted from figure	Yes			No	Yes	BACI	ELCI	Scotland		55.84	-3.173	Split-split plot	50x12	600	4	4 on cambisol and 4 on gleysol	1\3	SOC\yield			Eutric Cambisol	15.1	35.1	49.7	1.24			Bulk density at 6cm depth (whole depth profile down to 36cm presented)	1	0	2	0	0	3	High	1968	1986
2020UPDT011	B. C. Ball; R. W. Lang; M. F. O'Sullivan; M. F. Franklin	1989	Cultivation and nitrogen requirements for continuous winter barley on a Gleysol and a Cambisol	Long- and short-term direct-drilling and seed broadcasting plus rotovation were examined as alternatives to conventional mouldboard ploughing and drilling. The broadcasting and the short-term direct-drilling treatments were applied to previously chisel-ploughed and deep mouldboard-ploughed treatments, respectively. Autumn nitrogen treatments of 30 or 60 kg/ha and spring nitrogen treatments of 150…	Soil & Tillage Research	13		333-352	Haddaway_till_yield_MA	Soane, BD; Ball, BC (1998) Review of management and conduct of long-term tillage studies with special reference to a 25-yr experiment on barley in Scotland. Soil & Tillage Research 45:17-37	2020UPDT011	SOC and bulk density data extracted from figure	Yes			No	Yes	CI	ELCI	Scotland		55.84	-3.173	Split-split plot	50x12	600	4	4 on cambisol and 4 on gleysol	1\3	SOC\yield			Gleysol	16.6	36.2	47.1	1.53			Bulk density at 6cm depth (whole depth profile down to 36cm presented)	1	0	2	-2	0	3	High	1983	1986
2020UPDT011	B. C. Ball; R. W. Lang; M. F. O'Sullivan; M. F. Franklin	1989	Cultivation and nitrogen requirements for continuous winter barley on a Gleysol and a Cambisol	Long- and short-term direct-drilling and seed broadcasting plus rotovation were examined as alternatives to conventional mouldboard ploughing and drilling. The broadcasting and the short-term direct-drilling treatments were applied to previously chisel-ploughed and deep mouldboard-ploughed treatments, respectively. Autumn nitrogen treatments of 30 or 60 kg/ha and spring nitrogen treatments of 150…	Soil & Tillage Research	13		333-352	Haddaway_till_yield_MA	Soane, BD; Ball, BC (1998) Review of management and conduct of long-term tillage studies with special reference to a 25-yr experiment on barley in Scotland. Soil & Tillage Research 45:17-37	2020UPDT011	SOC and bulk density data extracted from figure	Yes			No	Yes	BACI	ELCI	Scotland		55.84	-3.173	Split-split plot	50x12	600	4	4 on cambisol and 4 on gleysol	1\3	SOC\yield			Gleysol	16.6	36.2	47.1	1.42			Bulk density at 6cm depth (whole depth profile down to 36cm presented)	1	0	2	0	0	3	High	1968	1986
2020UPDT011	B. C. Ball; R. W. Lang; M. F. O'Sullivan; M. F. Franklin	1989	Cultivation and nitrogen requirements for continuous winter barley on a Gleysol and a Cambisol	Long- and short-term direct-drilling and seed broadcasting plus rotovation were examined as alternatives to conventional mouldboard ploughing and drilling. The broadcasting and the short-term direct-drilling treatments were applied to previously chisel-ploughed and deep mouldboard-ploughed treatments, respectively. Autumn nitrogen treatments of 30 or 60 kg/ha and spring nitrogen treatments of 150…	Soil & Tillage Research	13		333-352	Haddaway_till_yield_MA	Soane, BD; Ball, BC (1998) Review of management and conduct of long-term tillage studies with special reference to a 25-yr experiment on barley in Scotland. Soil & Tillage Research 45:17-37	2020UPDT011	SOC and bulk density data extracted from figure	Yes			No	Yes	CI	ELCI	Scotland		55.84	-3.173	Split-split plot	50x12	600	4	4 on cambisol and 4 on gleysol	1\3	SOC\yield			Gleysol	16.6	36.2	47.1	1.42			Bulk density at 6cm depth (whole depth profile down to 36cm presented)	1	0	2	-2	0	3	High	1983	1986
2020UPDT011	B. C. Ball; R. W. Lang; M. F. O'Sullivan; M. F. Franklin	1989	Cultivation and nitrogen requirements for continuous winter barley on a Gleysol and a Cambisol	Long- and short-term direct-drilling and seed broadcasting plus rotovation were examined as alternatives to conventional mouldboard ploughing and drilling. The broadcasting and the short-term direct-drilling treatments were applied to previously chisel-ploughed and deep mouldboard-ploughed treatments, respectively. Autumn nitrogen treatments of 30 or 60 kg/ha and spring nitrogen treatments of 150…	Soil & Tillage Research	13		333-352	Haddaway_till_yield_MA	Soane, BD; Ball, BC (1998) Review of management and conduct of long-term tillage studies with special reference to a 25-yr experiment on barley in Scotland. Soil & Tillage Research 45:17-37	2020UPDT011	SOC and bulk density data extracted from figure	Yes			No	Yes	BACI	ELCI	Scotland		55.84	-3.173	Split-split plot	50x12	600	4	4 on cambisol and 4 on gleysol	1\3	SOC\yield			Gleysol	16.6	36.2	47.1	1.32			Bulk density at 6cm depth (whole depth profile down to 36cm presented)	1	0	2	0	0	3	High	1968	1986
2020UPDT012	B. C. Ball; M. F. O'Sullivan; R. W. Lang	1985	Cultivation and nitrogen requirement for winter barley as assessed from a reduced-tillage experiment on a brown forest soil	Direct drilling, spring-time cultivation to 60 mm and shallow mouldboard ploughing to 100 mm depth were examined as possible quick and cheap alternatives to mouldboard ploughing to 250 mm depth. Nitrogen was top-dressed either at the recommended rate or at 40% greater than the recommended rate. The experiment was on a well-drained sandy loam containing 3.8% easily oxidisable organic matter, repre…	Soil & Tillage Research	6		95-19			2020UPDT012	SOC data extracted from figure	Yes			No	Yes	CI	ELCI	Scotland	Thornton Mains, Rosewell	55.842	-3.13	Split plot	25x7.9	197.5	4		1\3	SOC\yield	Not specified		Eutric Cambisol	8.4	13.8	77.9	1.3	Fig 5		Bulk density data available for each tillage treatments but 1-6cm. pH data available if extracted from Fig 5	1	0	2	-2	1	3	High	1980	1983
2020UPDT012	B. C. Ball; M. F. O'Sullivan; R. W. Lang	1985	Cultivation and nitrogen requirement for winter barley as assessed from a reduced-tillage experiment on a brown forest soil	Direct drilling, spring-time cultivation to 60 mm and shallow mouldboard ploughing to 100 mm depth were examined as possible quick and cheap alternatives to mouldboard ploughing to 250 mm depth. Nitrogen was top-dressed either at the recommended rate or at 40% greater than the recommended rate. The experiment was on a well-drained sandy loam containing 3.8% easily oxidisable organic matter, repre…	Soil & Tillage Research	6		95-19			2020UPDT012	SOC data extracted from figure	Yes			No	Yes	CI	ELCI	Scotland	Thornton Mains, Rosewell	55.842	-3.13	Split plot	25x7.9	197.5	4		1\3	SOC\yield	Not specified		Eutric Cambisol	8.4	13.8	77.9	1.28	Fig 5		Bulk density data available for each tillage treatments but 1-6cm. pH data available if extracted from Fig 5	1	0	2	-2	1	3	High	1980	1983
2020UPDT012	B. C. Ball; M. F. O'Sullivan; R. W. Lang	1985	Cultivation and nitrogen requirement for winter barley as assessed from a reduced-tillage experiment on a brown forest soil	Direct drilling, spring-time cultivation to 60 mm and shallow mouldboard ploughing to 100 mm depth were examined as possible quick and cheap alternatives to mouldboard ploughing to 250 mm depth. Nitrogen was top-dressed either at the recommended rate or at 40% greater than the recommended rate. The experiment was on a well-drained sandy loam containing 3.8% easily oxidisable organic matter, repre…	Soil & Tillage Research	6		95-19			2020UPDT012	SOC data extracted from figure	Yes			No	Yes	CI	ELCI	Scotland	Thornton Mains, Rosewell	55.842	-3.13	Split plot	25x7.9	197.5	4		1\3	SOC\yield	Not specified		Eutric Cambisol	8.4	13.8	77.9	1.37	Fig 5		Bulk density data available for each tillage treatments but 1-6cm. pH data available if extracted from Fig 5	1	0	2	-2	1	3	High	1980	1983
2020UPDT012	B. C. Ball; M. F. O'Sullivan; R. W. Lang	1985	Cultivation and nitrogen requirement for winter barley as assessed from a reduced-tillage experiment on a brown forest soil	Direct drilling, spring-time cultivation to 60 mm and shallow mouldboard ploughing to 100 mm depth were examined as possible quick and cheap alternatives to mouldboard ploughing to 250 mm depth. Nitrogen was top-dressed either at the recommended rate or at 40% greater than the recommended rate. The experiment was on a well-drained sandy loam containing 3.8% easily oxidisable organic matter, repre…	Soil & Tillage Research	6		95-19			2020UPDT012	SOC data extracted from figure	Yes			No	Yes	CI	ELCI	Scotland	Thornton Mains, Rosewell	55.842	-3.13	Split plot	25x7.9	197.5	4		1\3	SOC\yield	Not specified		Eutric Cambisol	8.4	13.8	77.9	1.37	Fig 5		Bulk density data available for each tillage treatments but 1-6cm. pH data available if extracted from Fig 5	1	0	2	-2	1	3	High	1980	1983
2020UPDT038	S. J. Crittenden; N. Poot; M. Heinen; D. J. M. v. Balen; M. M. Pulleman	2015	Soil physical quality in contrasting tillage systems in organic and conventional farming	Reduced tillage can improve soil physical quality relative to mouldboard ploughing by lessening soil disturbance, leaving organic matter at the soil surface, and stimulating soil biological activity. In organic farming, continuous ploughing may negate benefits to soil structure and function from increased use of manures and more diverse crop rotations, which are particularly important components …	Soil & Tillage Research	154		136-144			2020UPDT038		Yes			Yes	Yes	CI	CI	Netherlands	Lelystad	52.539	5.562	Randomised complete block			4		1		Not specified			22	10	68	1.42	7.9	NS		1	0	2	-2	1	3	High	2008	2012
2020UPDT038	S. J. Crittenden; N. Poot; M. Heinen; D. J. M. v. Balen; M. M. Pulleman	2015	Soil physical quality in contrasting tillage systems in organic and conventional farming	Reduced tillage can improve soil physical quality relative to mouldboard ploughing by lessening soil disturbance, leaving organic matter at the soil surface, and stimulating soil biological activity. In organic farming, continuous ploughing may negate benefits to soil structure and function from increased use of manures and more diverse crop rotations, which are particularly important components …	Soil & Tillage Research	154		136-144			2020UPDT038		Yes			Yes	Yes	CI	CI	Netherlands	Lelystad	52.539	5.562	Randomised complete block			4		1		Not specified			22	10	68	1.4	7.9	NS		1	0	2	-2	1	3	High	2008	2012
2020UPDT038	S. J. Crittenden; N. Poot; M. Heinen; D. J. M. v. Balen; M. M. Pulleman	2015	Soil physical quality in contrasting tillage systems in organic and conventional farming	Reduced tillage can improve soil physical quality relative to mouldboard ploughing by lessening soil disturbance, leaving organic matter at the soil surface, and stimulating soil biological activity. In organic farming, continuous ploughing may negate benefits to soil structure and function from increased use of manures and more diverse crop rotations, which are particularly important components …	Soil & Tillage Research	154		136-144			2020UPDT038		Yes			Yes	Yes	CI	CI	Netherlands	Lelystad	52.539	5.562	Randomised complete block			4		1		Not specified			22	10	68	1.34	7.9	NS		1	0	2	-2	1	3	High	2008	2012
2020UPDT038	S. J. Crittenden; N. Poot; M. Heinen; D. J. M. v. Balen; M. M. Pulleman	2015	Soil physical quality in contrasting tillage systems in organic and conventional farming	Reduced tillage can improve soil physical quality relative to mouldboard ploughing by lessening soil disturbance, leaving organic matter at the soil surface, and stimulating soil biological activity. In organic farming, continuous ploughing may negate benefits to soil structure and function from increased use of manures and more diverse crop rotations, which are particularly important components …	Soil & Tillage Research	154		136-144			2020UPDT038		Yes			Yes	Yes	CI	CI	Netherlands	Lelystad	52.539	5.562	Randomised complete block			4		1		Not specified			22	10	68	1.29	7.9	NS		1	0	2	-2	1	3	High	2008	2012
2020UPDT038	S. J. Crittenden; N. Poot; M. Heinen; D. J. M. v. Balen; M. M. Pulleman	2015	Soil physical quality in contrasting tillage systems in organic and conventional farming	Reduced tillage can improve soil physical quality relative to mouldboard ploughing by lessening soil disturbance, leaving organic matter at the soil surface, and stimulating soil biological activity. In organic farming, continuous ploughing may negate benefits to soil structure and function from increased use of manures and more diverse crop rotations, which are particularly important components …	Soil & Tillage Research	154		136-144			2020UPDT038		Yes			Yes	Yes	CI	CI	Netherlands	Lelystad	52.539	5.562	Randomised complete block			4		1		Not specified			22	10	68	1.38	7.9	NS	Didn't measure bulk density for conv treatment in study, therefore averaged bulk density from Org CT treatments	1	0	2	-2	1	3	High	2008	2012
2020UPDT038	S. J. Crittenden; N. Poot; M. Heinen; D. J. M. v. Balen; M. M. Pulleman	2015	Soil physical quality in contrasting tillage systems in organic and conventional farming	Reduced tillage can improve soil physical quality relative to mouldboard ploughing by lessening soil disturbance, leaving organic matter at the soil surface, and stimulating soil biological activity. In organic farming, continuous ploughing may negate benefits to soil structure and function from increased use of manures and more diverse crop rotations, which are particularly important components …	Soil & Tillage Research	154		136-144			2020UPDT038		Yes			Yes	Yes	CI	CI	Netherlands	Lelystad	52.539	5.562	Randomised complete block			4		1		Not specified			22	10	68	1.35	7.9	NS	Didn't measure bulk density for conv treatment in study, therefore averaged bulk density from Org NT treatments	1	0	2	-2	1	3	High	2008	2012
2020UPDT043	J. Deru; H. v. Schooten; H. Huiting; R. v. d. Weide	2015	Reduced tillage for silage maize on sand and clay soils: effect on yield and soil organic matter. (Grassland Science in Europe, Volume 20)	Maize (Zea mays) cultivation for silage has negative impacts on soil and water quality: reduced soil organic matter, nitrate leaching, soil-biota decline, etc. These problems can be caused partly by intensive soil tillage, like ploughing. The suitability of less-intensive tillage alternatives for farmers, in terms of effects on yield and soil quality, is unknown. On three field experiments, two o…	Grassland Science in Europe	20	Grassland and forages in high output dairy farming systems	398-400			2020UPDT043a		Yes			No	No	CI	ELCI	Netherlands	Lelystad	52.539	5.562				3		1\3	SOM\yield			Young marine clay								?	0	?	-1	1	?	Unclear	2009	2014
2020UPDT043	J. Deru; H. v. Schooten; H. Huiting; R. v. d. Weide	2015	Reduced tillage for silage maize on sand and clay soils: effect on yield and soil organic matter. (Grassland Science in Europe, Volume 20)	Maize (Zea mays) cultivation for silage has negative impacts on soil and water quality: reduced soil organic matter, nitrate leaching, soil-biota decline, etc. These problems can be caused partly by intensive soil tillage, like ploughing. The suitability of less-intensive tillage alternatives for farmers, in terms of effects on yield and soil quality, is unknown. On three field experiments, two o…	Grassland Science in Europe	20	Grassland and forages in high output dairy farming systems	398-400			2020UPDT043a		Yes			No	No	CI	ELCI	Netherlands	Lelystad	52.539	5.562				3		1\3	SOM\yield			Young marine clay								?	0	?	-1	1	?	Unclear	2009	2014
2020UPDT043	J. Deru; H. v. Schooten; H. Huiting; R. v. d. Weide	2015	Reduced tillage for silage maize on sand and clay soils: effect on yield and soil organic matter. (Grassland Science in Europe, Volume 20)	Maize (Zea mays) cultivation for silage has negative impacts on soil and water quality: reduced soil organic matter, nitrate leaching, soil-biota decline, etc. These problems can be caused partly by intensive soil tillage, like ploughing. The suitability of less-intensive tillage alternatives for farmers, in terms of effects on yield and soil quality, is unknown. On three field experiments, two o…	Grassland Science in Europe	20	Grassland and forages in high output dairy farming systems	398-400			2020UPDT043a		Yes			No	No	CI	ELCI	Netherlands	Lelystad	52.539	5.562				3		1\3	SOM\yield			Young marine clay								?	0	?	-1	1	?	Unclear	2009	2014
2020UPDT043	J. Deru; H. v. Schooten; H. Huiting; R. v. d. Weide	2015	Reduced tillage for silage maize on sand and clay soils: effect on yield and soil organic matter. (Grassland Science in Europe, Volume 20)	Maize (Zea mays) cultivation for silage has negative impacts on soil and water quality: reduced soil organic matter, nitrate leaching, soil-biota decline, etc. These problems can be caused partly by intensive soil tillage, like ploughing. The suitability of less-intensive tillage alternatives for farmers, in terms of effects on yield and soil quality, is unknown. On three field experiments, two o…	Grassland Science in Europe	20	Grassland and forages in high output dairy farming systems	398-400			2020UPDT043b		Yes			No	No	CI	ELCI	Netherlands	Rolde	52.986	6.647				3		1\3	SOM\yield			Sand								?	0	?	-2	1	?	Unclear	2012	2014
2020UPDT043	J. Deru; H. v. Schooten; H. Huiting; R. v. d. Weide	2015	Reduced tillage for silage maize on sand and clay soils: effect on yield and soil organic matter. (Grassland Science in Europe, Volume 20)	Maize (Zea mays) cultivation for silage has negative impacts on soil and water quality: reduced soil organic matter, nitrate leaching, soil-biota decline, etc. These problems can be caused partly by intensive soil tillage, like ploughing. The suitability of less-intensive tillage alternatives for farmers, in terms of effects on yield and soil quality, is unknown. On three field experiments, two o…	Grassland Science in Europe	20	Grassland and forages in high output dairy farming systems	398-400			2020UPDT043b		Yes			No	No	CI	ELCI	Netherlands	Rolde	52.986	6.647				3		1\3	SOM\yield			Sand								?	0	?	-2	1	?	Unclear	2012	2014
2020UPDT043	J. Deru; H. v. Schooten; H. Huiting; R. v. d. Weide	2015	Reduced tillage for silage maize on sand and clay soils: effect on yield and soil organic matter. (Grassland Science in Europe, Volume 20)	Maize (Zea mays) cultivation for silage has negative impacts on soil and water quality: reduced soil organic matter, nitrate leaching, soil-biota decline, etc. These problems can be caused partly by intensive soil tillage, like ploughing. The suitability of less-intensive tillage alternatives for farmers, in terms of effects on yield and soil quality, is unknown. On three field experiments, two o…	Grassland Science in Europe	20	Grassland and forages in high output dairy farming systems	398-400			2020UPDT043b		Yes			No	No	CI	ELCI	Netherlands	Rolde	52.986	6.647				3		1\3	SOM\yield			Sand								?	0	?	-2	1	?	Unclear	2012	2014
2020UPDT043	J. Deru; H. v. Schooten; H. Huiting; R. v. d. Weide	2015	Reduced tillage for silage maize on sand and clay soils: effect on yield and soil organic matter. (Grassland Science in Europe, Volume 20)	Maize (Zea mays) cultivation for silage has negative impacts on soil and water quality: reduced soil organic matter, nitrate leaching, soil-biota decline, etc. These problems can be caused partly by intensive soil tillage, like ploughing. The suitability of less-intensive tillage alternatives for farmers, in terms of effects on yield and soil quality, is unknown. On three field experiments, two o…	Grassland Science in Europe	20	Grassland and forages in high output dairy farming systems	398-400			2020UPDT043c	Calculated mean and SE for SOC and yield from author data	Yes			Yes	Yes	BACI	ELCI	Netherlands	De Moer	51.624	5.012				4		1\3	SOM\yield			Sand	1			1.4			Clay <1% according to author; bulk density assumed by author not measured	?	0	?	-2	1	?	Unclear	2012	2014
2020UPDT043	J. Deru; H. v. Schooten; H. Huiting; R. v. d. Weide	2015	Reduced tillage for silage maize on sand and clay soils: effect on yield and soil organic matter. (Grassland Science in Europe, Volume 20)	Maize (Zea mays) cultivation for silage has negative impacts on soil and water quality: reduced soil organic matter, nitrate leaching, soil-biota decline, etc. These problems can be caused partly by intensive soil tillage, like ploughing. The suitability of less-intensive tillage alternatives for farmers, in terms of effects on yield and soil quality, is unknown. On three field experiments, two o…	Grassland Science in Europe	20	Grassland and forages in high output dairy farming systems	398-400			2020UPDT043c	Calculated mean and SE for SOC and yield from author data	Yes			Yes	Yes	BACI	ELCI	Netherlands	De Moer	51.624	5.012				4		1\3	SOM\yield			Sand	1			1.4			Clay <1% according to author; bulk density assumed by author not measured	?	0	?	-2	1	?	Unclear	2012	2014
2020UPDT043	J. Deru; H. v. Schooten; H. Huiting; R. v. d. Weide	2015	Reduced tillage for silage maize on sand and clay soils: effect on yield and soil organic matter. (Grassland Science in Europe, Volume 20)	Maize (Zea mays) cultivation for silage has negative impacts on soil and water quality: reduced soil organic matter, nitrate leaching, soil-biota decline, etc. These problems can be caused partly by intensive soil tillage, like ploughing. The suitability of less-intensive tillage alternatives for farmers, in terms of effects on yield and soil quality, is unknown. On three field experiments, two o…	Grassland Science in Europe	20	Grassland and forages in high output dairy farming systems	398-400			2020UPDT043c	Calculated mean and SE for SOC and yield from author data	Yes			Yes	Yes	BACI	ELCI	Netherlands	De Moer	51.624	5.012				4		1\3	SOM\yield			Sand	1			1.4			Clay <1% according to author; bulk density assumed by author not measured	?	0	?	-2	1	?	Unclear	2012	2014
2020UPDT058	G. S. Francis; R. J. Haynes; T. L. Knight	1992	An overview of results from the long-term no-tillage trials at Winchmore	Field experiments comparing soil properties, earthworm populations and crop yields under conventional tillage ((CT), involving mouldboard ploughing to about 150 mm depth followed by at least 2 secondary tillage operations) and no-tillage (NT) were conducted for 9 consecutive years at 2 sites in Canterbury, New Zealand. The Lismore silt loam had been under long-term pasture before the experiment, …	Proceedings Annual Conference Agronomy Society of New Zealand	22		97-101			2020UPDT058a	Yield data extracted from figures	Yes			Yes	Yes	BACI	ELCI	New Zealand	Lismore	-43.924	171.49		30x90	2700	3		2\9	Implied SOC measured every year, but only baseline&endline results presented. Therefore CA_temporal averaged between 0 and 2, i.e. 1			Silt loam				1.07				1	1	?	-1	0	?	Unclear	1978	1987
2020UPDT058	G. S. Francis; R. J. Haynes; T. L. Knight	1992	An overview of results from the long-term no-tillage trials at Winchmore	Field experiments comparing soil properties, earthworm populations and crop yields under conventional tillage ((CT), involving mouldboard ploughing to about 150 mm depth followed by at least 2 secondary tillage operations) and no-tillage (NT) were conducted for 9 consecutive years at 2 sites in Canterbury, New Zealand. The Lismore silt loam had been under long-term pasture before the experiment, …	Proceedings Annual Conference Agronomy Society of New Zealand	22		97-101			2020UPDT058a	Yield data extracted from figures	Yes			Yes	Yes	BACI	ELCI	New Zealand	Lismore	-43.924	171.49		30x90	2700	3		2\9	Implied SOC measured every year, but only baseline&endline results presented. Therefore CA_temporal averaged between 0 and 2, i.e. 1			Silt loam				1.07				1	1	?	-1	0	?	Unclear	1978	1987
2020UPDT058	G. S. Francis; R. J. Haynes; T. L. Knight	1992	An overview of results from the long-term no-tillage trials at Winchmore	Field experiments comparing soil properties, earthworm populations and crop yields under conventional tillage ((CT), involving mouldboard ploughing to about 150 mm depth followed by at least 2 secondary tillage operations) and no-tillage (NT) were conducted for 9 consecutive years at 2 sites in Canterbury, New Zealand. The Lismore silt loam had been under long-term pasture before the experiment, …	Proceedings Annual Conference Agronomy Society of New Zealand	22		97-101			2020UPDT058b	Yield data extracted from figures	Yes			Yes	Yes	BACI	ELCI	New Zealand	Wakanui	-43.99	171.869		30x90	2700	3		2\9	Implied SOC measured every year, but only baseline&endline results presented			Silt loam				1.18				1	1	?	-1	0	?	Unclear	1980	1989
2020UPDT058	G. S. Francis; R. J. Haynes; T. L. Knight	1992	An overview of results from the long-term no-tillage trials at Winchmore	Field experiments comparing soil properties, earthworm populations and crop yields under conventional tillage ((CT), involving mouldboard ploughing to about 150 mm depth followed by at least 2 secondary tillage operations) and no-tillage (NT) were conducted for 9 consecutive years at 2 sites in Canterbury, New Zealand. The Lismore silt loam had been under long-term pasture before the experiment, …	Proceedings Annual Conference Agronomy Society of New Zealand	22		97-101			2020UPDT058b	Yield data extracted from figures	Yes			Yes	Yes	BACI	ELCI	New Zealand	Wakanui	-43.99	171.869		30x90	2700	3		2\9	Implied SOC measured every year, but only baseline&endline results presented			Silt loam				1.23				1	1	?	-1	0	?	Unclear	1980	1989
2020UPDT066	E. M. Hansen; L. J. Munkholm; J. E. Olesen; B. Melander	2015	Nitrate Leaching, Yields and Carbon Sequestration after Noninversion Tillage, Catch Crops, and Straw Retention	Crop management factors, such as tillage, rotation, and straw retention, need to be long-term to allow conclusions on effects on crop yields, nitrate leaching, and carbon sequestration. In 2002, two field experiments, each including four cash crop rotations, were established on soils with 9 and 15% clay, under temperate, coastal climate conditions. Direct drilling and harrowing to two different d…	Journal of Environmental Quality	44		868-881			2020UPDT066a		Yes			No	No	ELCI	CI	Denmark	Flakkebjerg	55.318	11.388	Randomised complete split plot	6x40	240	4		2\9	SOC\yield	20		Glossic Phaeozem	14.7	13.7	69.6					1	1	2	0	2	3	High	2002	2011
2020UPDT066	E. M. Hansen; L. J. Munkholm; J. E. Olesen; B. Melander	2015	Nitrate Leaching, Yields and Carbon Sequestration after Noninversion Tillage, Catch Crops, and Straw Retention	Crop management factors, such as tillage, rotation, and straw retention, need to be long-term to allow conclusions on effects on crop yields, nitrate leaching, and carbon sequestration. In 2002, two field experiments, each including four cash crop rotations, were established on soils with 9 and 15% clay, under temperate, coastal climate conditions. Direct drilling and harrowing to two different d…	Journal of Environmental Quality	44		868-881			2020UPDT066a		Yes			No	No	ELCI	CI	Denmark	Flakkebjerg	55.318	11.388	Randomised complete split plot	6x40	240	4		2\9	SOC\yield	20		Glossic Phaeozem	14.7	13.7	69.6					1	1	2	0	2	3	High	2002	2011
2020UPDT066	E. M. Hansen; L. J. Munkholm; J. E. Olesen; B. Melander	2015	Nitrate Leaching, Yields and Carbon Sequestration after Noninversion Tillage, Catch Crops, and Straw Retention	Crop management factors, such as tillage, rotation, and straw retention, need to be long-term to allow conclusions on effects on crop yields, nitrate leaching, and carbon sequestration. In 2002, two field experiments, each including four cash crop rotations, were established on soils with 9 and 15% clay, under temperate, coastal climate conditions. Direct drilling and harrowing to two different d…	Journal of Environmental Quality	44		868-881			2020UPDT066a		Yes			No	No	ELCI	CI	Denmark	Flakkebjerg	55.318	11.388	Randomised complete split plot	6x40	240	4		2\9	SOC\yield	20		Glossic Phaeozem	14.7	13.7	69.6					1	1	2	0	2	3	High	2002	2011
2020UPDT066	E. M. Hansen; L. J. Munkholm; J. E. Olesen; B. Melander	2015	Nitrate Leaching, Yields and Carbon Sequestration after Noninversion Tillage, Catch Crops, and Straw Retention	Crop management factors, such as tillage, rotation, and straw retention, need to be long-term to allow conclusions on effects on crop yields, nitrate leaching, and carbon sequestration. In 2002, two field experiments, each including four cash crop rotations, were established on soils with 9 and 15% clay, under temperate, coastal climate conditions. Direct drilling and harrowing to two different d…	Journal of Environmental Quality	44		868-881			2020UPDT066a		Yes			No	No	ELCI	CI	Denmark	Flakkebjerg	55.318	11.388	Randomised complete split plot	6x40	240	4		2\9	SOC\yield	20		Glossic Phaeozem	14.7	13.7	69.6					1	1	2	0	2	3	High	2002	2011
2020UPDT070	M.-P. Hiel; S. Barbieux; J. Pierreux; C. Olivier; G. Lobet; C. Roisin; S. Garre; G. Colinet; B. Bodson; B. Dumont	2018	Impact of crop residue management on crop production and soil chemistry after seven years of crop rotation in temperate climate, loamy soils	Society is increasingly demanding a more sustainable management of agro-ecosystems in a context of climate change and an ever growing global population. The fate of crop residues is one of the important management aspects under debate, since it represents an unneglectable quantity of organic matter which can be kept in or removed from the agro-ecosystem. The topic of residue management is not new…	Peerj						2020UPDT070	SOC & yield data extracted from figures; yield error calculated	Yes			Yes	Yes	ELCI	ELCI	Belgium	Gembloux Agro-Bio Tech experimental farm, University of Liège	50.563	4.713	Latin square	15x40	600	4		10\6	SOC\yield	10		Cutanic Luvisol	20	75	5	1.4	6		Clay, silt, sand averaged from reported range	1	2	2	-1	2	3	High	2008	2015
2020UPDT070	M.-P. Hiel; S. Barbieux; J. Pierreux; C. Olivier; G. Lobet; C. Roisin; S. Garre; G. Colinet; B. Bodson; B. Dumont	2018	Impact of crop residue management on crop production and soil chemistry after seven years of crop rotation in temperate climate, loamy soils	Society is increasingly demanding a more sustainable management of agro-ecosystems in a context of climate change and an ever growing global population. The fate of crop residues is one of the important management aspects under debate, since it represents an unneglectable quantity of organic matter which can be kept in or removed from the agro-ecosystem. The topic of residue management is not new…	Peerj						2020UPDT070	SOC & yield data extracted from figures; yield error calculated	Yes			Yes	Yes	ELCI	ELCI	Belgium	Gembloux Agro-Bio Tech experimental farm, University of Liège	50.563	4.713	Latin square	15x40	600	4		10\6	SOC\yield	10		Cutanic Luvisol	20	75	5	1.4	6		Clay, silt, sand averaged from reported range	1	2	2	-1	2	3	High	2008	2015
2020UPDT070	M.-P. Hiel; S. Barbieux; J. Pierreux; C. Olivier; G. Lobet; C. Roisin; S. Garre; G. Colinet; B. Bodson; B. Dumont	2018	Impact of crop residue management on crop production and soil chemistry after seven years of crop rotation in temperate climate, loamy soils	Society is increasingly demanding a more sustainable management of agro-ecosystems in a context of climate change and an ever growing global population. The fate of crop residues is one of the important management aspects under debate, since it represents an unneglectable quantity of organic matter which can be kept in or removed from the agro-ecosystem. The topic of residue management is not new…	Peerj						2020UPDT070	SOC & yield data extracted from figures; yield error calculated	Yes			Yes	Yes	ELCI	ELCI	Belgium	Gembloux Agro-Bio Tech experimental farm, University of Liège	50.563	4.713	Latin square	15x40	600	4		10\6	SOC\yield	10		Cutanic Luvisol	20	75	5	1.4	6		Clay, silt, sand averaged from reported range	1	2	2	-1	2	3	High	2008	2015
2020UPDT070	M.-P. Hiel; S. Barbieux; J. Pierreux; C. Olivier; G. Lobet; C. Roisin; S. Garre; G. Colinet; B. Bodson; B. Dumont	2018	Impact of crop residue management on crop production and soil chemistry after seven years of crop rotation in temperate climate, loamy soils	Society is increasingly demanding a more sustainable management of agro-ecosystems in a context of climate change and an ever growing global population. The fate of crop residues is one of the important management aspects under debate, since it represents an unneglectable quantity of organic matter which can be kept in or removed from the agro-ecosystem. The topic of residue management is not new…	Peerj						2020UPDT070	SOC & yield data extracted from figures; yield error calculated	Yes			Yes	Yes	ELCI	ELCI	Belgium	Gembloux Agro-Bio Tech experimental farm, University of Liège	50.563	4.713	Latin square	15x40	600	4		10\6	SOC\yield	10		Cutanic Luvisol	20	75	5	1.4	6		Clay, silt, sand averaged from reported range	1	2	2	-1	2	3	High	2008	2015
2020UPDT126	J. Peigne; J.-F. Vian; V. Payet; N. P. A. Saby	2018	Soil fertility after 10 years of conservation tillage in organic farming	It has become commonplace to consider ploughing as an agricultural practice that destroys soil fertility. Organic farmers have traditionally used the plough to till their soil and control weeds. However, there is a growing interest in adopting tillage practices without ploughing to preserve long-term soil fertility and in the hope, subsequently, of increasing crop yields. The aim of this paper is…	Soil & Tillage Research	175		194-204			2020UPDT126	SOC data extracted from figure, error calculated from box plot values	Yes			Yes	Yes	BACI	CI	France		45.819	5.034	Randomised	80x12	960	3		2\1	SOC\yield	12			15	32	53	1.5	8.2			1	0	2	0	2	3	High	2005	2015
2020UPDT126	J. Peigne; J.-F. Vian; V. Payet; N. P. A. Saby	2018	Soil fertility after 10 years of conservation tillage in organic farming	It has become commonplace to consider ploughing as an agricultural practice that destroys soil fertility. Organic farmers have traditionally used the plough to till their soil and control weeds. However, there is a growing interest in adopting tillage practices without ploughing to preserve long-term soil fertility and in the hope, subsequently, of increasing crop yields. The aim of this paper is…	Soil & Tillage Research	175		194-204			2020UPDT126	SOC data extracted from figure, error calculated from box plot values	Yes			No (box plot tails)	Yes	BACI	CI	France		45.819	5.034	Randomised	80x12	960	3		2\1	SOC\yield	12			15	32	53	1.5	8.2			1	0	2	0	2	3	High	2005	2015
2020UPDT126	J. Peigne; J.-F. Vian; V. Payet; N. P. A. Saby	2018	Soil fertility after 10 years of conservation tillage in organic farming	It has become commonplace to consider ploughing as an agricultural practice that destroys soil fertility. Organic farmers have traditionally used the plough to till their soil and control weeds. However, there is a growing interest in adopting tillage practices without ploughing to preserve long-term soil fertility and in the hope, subsequently, of increasing crop yields. The aim of this paper is…	Soil & Tillage Research	175		194-204			2020UPDT126	SOC data extracted from figure, error calculated from box plot values	Yes			No (box plot tails)	Yes	BACI	CI	France		45.819	5.034	Randomised	80x12	960	3		2\1	SOC\yield	12			15	32	53	1.4	8.2			1	0	2	0	2	3	High	2005	2015
2020UPDT126	J. Peigne; J.-F. Vian; V. Payet; N. P. A. Saby	2018	Soil fertility after 10 years of conservation tillage in organic farming	It has become commonplace to consider ploughing as an agricultural practice that destroys soil fertility. Organic farmers have traditionally used the plough to till their soil and control weeds. However, there is a growing interest in adopting tillage practices without ploughing to preserve long-term soil fertility and in the hope, subsequently, of increasing crop yields. The aim of this paper is…	Soil & Tillage Research	175		194-204			2020UPDT126	SOC data extracted from figure, error calculated from box plot values	Yes			No (box plot tails)	Yes	BACI	CI	France		45.819	5.034	Randomised	80x12	960	3		2\1	SOC\yield	12			15	32	53	1.6	8.2			1	0	2	0	2	3	High	2005	2015
2020UPDT199	S. Zikeli; S. Gruber; C. F. Teufel; K. Hartung; W. Claupein	2013	Effects of reduced tillage on crop yield, plant available nutrients and soil organic matter in a 12-year long-term trial under organic management	A field experiment was performed in Southwest Germany to examine the effects of long-term reduced tillage (2000-2012). Tillage treatments were deep moldboard plow: DP, 25 cm; double-layer plow; DLP, 15+10 cm, shallow moldboard plow: SP, 15 cm and chisel plow: CP, 15 cm, each of them with or without preceding stubble tillage. The mean yields of a typical eight-year crop rotation were 22% lower wit…	Sustainability						2020UPDT199	SOC & yield data extracted from figures; additional yield calculations	Yes			Yes	Yes	CI	ELCI	Germany	Kleinhohenheim	48.738	9.201	Factorial	20x40	800	4		1\8	SOC\yield	5		Haplic Luvisol				1.5	6.3		Only present lowest and highest bulk density values (corresponding to SP and CP treatments, respectively), so average these for the other two treatments, as values assumed to be intermediate.	1	1	2	0	2	3	High	1999	2012
2020UPDT199	S. Zikeli; S. Gruber; C. F. Teufel; K. Hartung; W. Claupein	2013	Effects of reduced tillage on crop yield, plant available nutrients and soil organic matter in a 12-year long-term trial under organic management	A field experiment was performed in Southwest Germany to examine the effects of long-term reduced tillage (2000-2012). Tillage treatments were deep moldboard plow: DP, 25 cm; double-layer plow; DLP, 15+10 cm, shallow moldboard plow: SP, 15 cm and chisel plow: CP, 15 cm, each of them with or without preceding stubble tillage. The mean yields of a typical eight-year crop rotation were 22% lower wit…	Sustainability						2020UPDT199	SOC & yield data extracted from figures; additional yield calculations	Yes			Yes	Yes	CI	ELCI	Germany	Kleinhohenheim	48.738	9.201	Factorial	20x40	800	4		1\8	SOC\yield	5		Haplic Luvisol				1.5	6.3		Only present lowest and highest bulk density values (corresponding to SP and CP treatments, respectively), so average these for the other two treatments, as values assumed to be intermediate.	1	1	2	0	2	3	High	1999	2012
2020UPDT199	S. Zikeli; S. Gruber; C. F. Teufel; K. Hartung; W. Claupein	2013	Effects of reduced tillage on crop yield, plant available nutrients and soil organic matter in a 12-year long-term trial under organic management	A field experiment was performed in Southwest Germany to examine the effects of long-term reduced tillage (2000-2012). Tillage treatments were deep moldboard plow: DP, 25 cm; double-layer plow; DLP, 15+10 cm, shallow moldboard plow: SP, 15 cm and chisel plow: CP, 15 cm, each of them with or without preceding stubble tillage. The mean yields of a typical eight-year crop rotation were 22% lower wit…	Sustainability						2020UPDT199	SOC & yield data extracted from figures; additional yield calculations	Yes			Yes	Yes	CI	ELCI	Germany	Kleinhohenheim	48.738	9.201	Factorial	20x40	800	4		1\8	SOC\yield	5		Haplic Luvisol				1.4	6.3			1	1	2	0	2	3	High	1999	2012
2020UPDT199	S. Zikeli; S. Gruber; C. F. Teufel; K. Hartung; W. Claupein	2013	Effects of reduced tillage on crop yield, plant available nutrients and soil organic matter in a 12-year long-term trial under organic management	A field experiment was performed in Southwest Germany to examine the effects of long-term reduced tillage (2000-2012). Tillage treatments were deep moldboard plow: DP, 25 cm; double-layer plow; DLP, 15+10 cm, shallow moldboard plow: SP, 15 cm and chisel plow: CP, 15 cm, each of them with or without preceding stubble tillage. The mean yields of a typical eight-year crop rotation were 22% lower wit…	Sustainability						2020UPDT199	SOC & yield data extracted from figures; additional yield calculations	Yes			Yes	Yes	CI	ELCI	Germany	Kleinhohenheim	48.738	9.201	Factorial	20x40	800	4		1\8	SOC\yield	5		Haplic Luvisol				1.6	6.3			1	1	2	0	2	3	High	1999	2012
10245926	Dimassi B ; Cohan J P; Labreuche J ; Mary B ;	2013	Changes in soil carbon and nitrogen following tillage conversion in a long-term experiment in Northern France	Although continuous no-till (NT) is recommended for erosion control and carbon sequestration, it often has a limited duration since farmers alternate between NT and full inversion tillage (FIT) to control weed infestation and avoid soil compaction. In this paper, we evaluate the effect of continuous tillage and tillage conversion of NT to FIT and vice versa on SOC and SON stocks, in a long-term e…	Agriculture Ecosystems & Environment	169		12--20			10245926	Bulk density values averaged across depths	Yes			Yes	Yes	ELCI	ELCI	France	Arvalis-Institut du Végétal, Boigneville	48.33	2.38	Randomised block		202.5	3		3\20	SOC\Yield	9\3	SOC\Yield	Haplic Luvisol	22.7	68.7	6.7	1.4675	7.03	H2O		1	1	2	1	2	3	High	1991	2011
10245926	Dimassi B ; Cohan J P; Labreuche J ; Mary B ;	2013	Changes in soil carbon and nitrogen following tillage conversion in a long-term experiment in Northern France	Although continuous no-till (NT) is recommended for erosion control and carbon sequestration, it often has a limited duration since farmers alternate between NT and full inversion tillage (FIT) to control weed infestation and avoid soil compaction. In this paper, we evaluate the effect of continuous tillage and tillage conversion of NT to FIT and vice versa on SOC and SON stocks, in a long-term e…	Agriculture Ecosystems & Environment	169		12--20			10245926	Bulk density values averaged across depths	Yes			Yes	Yes	ELCI	CI	France	Arvalis-Institut du Végétal, Boigneville	48.33	2.38	Randomised block		202.5	3		3\20	SOC\Yield	9\3	SOC\Yield	Haplic Luvisol	22.7	68.7	6.7	1.4375	7.03	H2O		1	1	2	-1	2	3	High	2005	2011
10245926	Dimassi B ; Cohan J P; Labreuche J ; Mary B ;	2013	Changes in soil carbon and nitrogen following tillage conversion in a long-term experiment in Northern France	Although continuous no-till (NT) is recommended for erosion control and carbon sequestration, it often has a limited duration since farmers alternate between NT and full inversion tillage (FIT) to control weed infestation and avoid soil compaction. In this paper, we evaluate the effect of continuous tillage and tillage conversion of NT to FIT and vice versa on SOC and SON stocks, in a long-term e…	Agriculture Ecosystems & Environment	169		12--20			10245926	Bulk density values averaged across depths	Yes			Yes	Yes	ELCI	ELCI	France	Arvalis-Institut du Végétal, Boigneville	48.33	2.38	Randomised block		202.5	3		3\20	SOC\Yield	9\3	SOC\Yield	Haplic Luvisol	23.9	68.3	5.8	1.475	6.93	H2O		1	1	2	1	2	3	High	1991	2011
10245926	Dimassi B ; Cohan J P; Labreuche J ; Mary B ;	2013	Changes in soil carbon and nitrogen following tillage conversion in a long-term experiment in Northern France	Although continuous no-till (NT) is recommended for erosion control and carbon sequestration, it often has a limited duration since farmers alternate between NT and full inversion tillage (FIT) to control weed infestation and avoid soil compaction. In this paper, we evaluate the effect of continuous tillage and tillage conversion of NT to FIT and vice versa on SOC and SON stocks, in a long-term e…	Agriculture Ecosystems & Environment	169		12--20			10245926	Bulk density values averaged across depths	Yes			Yes	Yes	ELCI	CI	France	Arvalis-Institut du Végétal, Boigneville	48.33	2.38	Randomised block		202.5	3		3\20	SOC\Yield	9\3	SOC\Yield	Haplic Luvisol	23.9	68.3	5.8	1.46875	6.93	H2O		1	1	2	-1	2	3	High	2005	2011
2016UPDT018	Jacobs, A;, Stefan Jungertb and Heinz-Josef Kocha	2015	Soil organic carbon as affected by direct drilling and mulching in sugar beet–wheat rotations		Archives of Agronomy and Soil Science	61		1079-1087	2016UPDT004, 2016UPDT031		2016UPDT018b		Yes			No	No	ELCI	CI	Germany	Grombach	48.572	8.546	Purposive		16000	1		2\8	SOC\Yield			Leptic/Haplic Luvisol	26	72	2	1.48	6.4		Clay/silt/sand from author	-1	0	0	0	2	-1	Low	1991	2010
2016UPDT018	Jacobs, A;, Stefan Jungertb and Heinz-Josef Kocha	2015	Soil organic carbon as affected by direct drilling and mulching in sugar beet–wheat rotations		Archives of Agronomy and Soil Science	61		1079-1087	2016UPDT004, 2016UPDT031		2016UPDT018b		Yes			No	No	ELCI	CI	Germany	Grombach	48.572	8.546	Purposive		16000	1		2\8	SOC\Yield			Leptic/Haplic Luvisol	26	72	2	1.4	6.4		Clay/silt/sand from author	-1	0	0	0	2	-1	Low	1991	2010
2016UPDT018	Jacobs, A;, Stefan Jungertb and Heinz-Josef Kocha	2015	Soil organic carbon as affected by direct drilling and mulching in sugar beet–wheat rotations		Archives of Agronomy and Soil Science	61		1079-1087	2016UPDT004, 2016UPDT031		2016UPDT018b		Yes			No	No	ELCI	CI	Germany	Grombach	48.572	8.546	Purposive		16000	1		2\8	SOC\Yield			Leptic/Haplic Luvisol	26	72	2	1.53	6.4		Clay/silt/sand from author	-1	0	0	0	2	-1	Low	1991	2010
2016UPDT018	Jacobs, A;, Stefan Jungertb and Heinz-Josef Kocha	2015	Soil organic carbon as affected by direct drilling and mulching in sugar beet–wheat rotations		Archives of Agronomy and Soil Science	61		1079-1087	2016UPDT004, 2016UPDT031		2016UPDT018c		Yes			No	No	ELCI	CI	Germany	Insultheim	49.033	8.05	Purposive		16000	1		2\7	SOC\Yield			Gleyic Cambisol	30	52	18	1.52	7.6		Clay/silt/sand from author	-1	0	0	0	2	-1	Low	1992	2010
2016UPDT018	Jacobs, A;, Stefan Jungertb and Heinz-Josef Kocha	2015	Soil organic carbon as affected by direct drilling and mulching in sugar beet–wheat rotations		Archives of Agronomy and Soil Science	61		1079-1087	2016UPDT004, 2016UPDT031		2016UPDT018c		Yes			No	No	ELCI	CI	Germany	Insultheim	49.033	8.05	Purposive		16000	1		2\7	SOC\Yield			Gleyic Cambisol	30	52	18	1.41	7.6		Clay/silt/sand from author	-1	0	0	0	2	-1	Low	1992	2010
2016UPDT018	Jacobs, A;, Stefan Jungertb and Heinz-Josef Kocha	2015	Soil organic carbon as affected by direct drilling and mulching in sugar beet–wheat rotations		Archives of Agronomy and Soil Science	61		1079-1087	2016UPDT004, 2016UPDT031		2016UPDT018c		Yes			No	No	ELCI	CI	Germany	Insultheim	49.033	8.05	Purposive		16000	1		2\7	SOC\Yield			Gleyic Cambisol	30	52	18	1.25	7.6		Clay/silt/sand from author	-1	0	0	0	2	-1	Low	1992	2010
2016UPDT018	Jacobs, A;, Stefan Jungertb and Heinz-Josef Kocha	2015	Soil organic carbon as affected by direct drilling and mulching in sugar beet–wheat rotations		Archives of Agronomy and Soil Science	61		1079-1087	2016UPDT004, 2016UPDT031		2016UPDT018e		Yes			No	No	ELCI	CI	Germany	Sailtheim	49.05	9.083	Purposive		16000	1		2\8	SOC\Yield			Haplic Luvisol	19	78	3	1.59	7.3		Clay/silt/sand from author	-1	0	0	0	2	-1	Low	1991	2010
2016UPDT018	Jacobs, A;, Stefan Jungertb and Heinz-Josef Kocha	2015	Soil organic carbon as affected by direct drilling and mulching in sugar beet–wheat rotations		Archives of Agronomy and Soil Science	61		1079-1087	2016UPDT004, 2016UPDT031		2016UPDT018e		Yes			No	No	ELCI	CI	Germany	Sailtheim	49.05	9.083	Purposive		16000	1		2\8	SOC\Yield			Haplic Luvisol	19	78	3	1.21	7.3		Clay/silt/sand from author	-1	0	0	0	2	-1	Low	1991	2010
2016UPDT018	Jacobs, A;, Stefan Jungertb and Heinz-Josef Kocha	2015	Soil organic carbon as affected by direct drilling and mulching in sugar beet–wheat rotations		Archives of Agronomy and Soil Science	61		1079-1087	2016UPDT004, 2016UPDT031		2016UPDT018e		Yes			No	No	ELCI	CI	Germany	Sailtheim	49.05	9.083	Purposive		16000	1		2\8	SOC\Yield			Haplic Luvisol	19	78	3	1.35	7.3		Clay/silt/sand from author	-1	0	0	0	2	-1	Low	1991	2010
[truncated: 78 more columns]
